# Supplementary material for: Reliable Identification of Environmental Pseudomonas Isolates Using the rpoD Gene
Source: Microorganisms. 2020 Jul 31;8(8):1166. doi: 10.3390/microorganisms8081166 (PMC7463772; doi:10.3390/microorganisms8081166)
Supplement: Supplementary file 1 [file microorganisms-08-01166-s001.xlsx]

## Sheet: TableS1_AccessionNumberTypeStra
Species	Type strain	rpoD gene	Genome
Pseudomonas abietaniphila	ATCC 700689 = CIP 106708	FN554447.1	FNCO00000000.1
Pseudomonas abyssi	MT5 = KCTC 62295	NTMR00000000.1	NTMR00000000.1
Pseudomonas aeruginosa	ATCC 10145 = LMG 1242 = DSM 50071	AB039607.1	CP012001.1
Pseudomonas aestusnigri	VGXO14 = CECT 8317	FN994281.2	NBYK00000000.1
Pseudomonas agarici	ATCC 25941 = LMG 2112	AB039563.1	FOAR00000000.1
Pseudomonas alcaligenes	ATCC 14909 = NBRC 14159	AB039606.1	BATI00000000.1
Pseudomonas alcaliphila	LMG 23134 = JCM 10630	FN554448.1	FNAE00000000.1
Pseudomonas alkylphenolica	KL28 = JCM 16553	HE577794.1	CP009048.1
Pseudomonas alloputida	LMG 29756	OLKK00000000.1	OLKK00000000.1
Pseudomonas amygdali	CFBP 3205 = NCPPB 2607 = LMG 13184	AB039509.1	JYHB00000000.1
Pseudomonas anguilliseptica	DSM 12111 = LMG 21629	FN554449.1	FNSC00000000.1
Pseudomonas antarctica	BS2772 = LMG 22709	FN554450.1	LT629704.1
Pseudomonas argentinensis	LMG 22563	FN554451.1	FORC00000000.1
Pseudomonas arsenicoxydans	CECT 7543	HE800488.1	LT629705.1
Pseudomonas asiatica	RYU5 = DSM 107182 = JCM 32716	LC435053.1	BLJF00000000.1
Pseudomonas asplenii	LMG 2137 = ATCC 23835	AB039593.1	LT629777.1
Pseudomonas asturiensis	LMG 26898	FRDA00000000.1	FRDA00000000.1
Pseudomonas avellanae	BPIC 631 = CIP 105176	FN554454.1	AKBS00000000.1
Pseudomonas aylmerense	S1E40 = LMG 30784	MAUE00000000.1	MAUE00000000.1
Pseudomonas azotifigens	6H33b = DSM 17556	AUDU00000000.1	AUDU00000000.1
Pseudomonas azotoformans	IAM 1603 = LMG 21611	AB039547.1	LT629702.1
Pseudomonas baetica	a390 = CECT 7720	FN678357.1	PHHE00000000.1
Pseudomonas balearica	DSM 6083 = CIP 105297	AB039605.1	CP007511.1
Pseudomonas batumici	UCM_B-321	JXDG00000000.1	JXDG00000000.1
Pseudomonas bauzanensis	BZ93 = DSM 22558	HE800489.1	FOGN00000000.1
Pseudomonas benzenivorans	DSM 8628	HE800490.1	FNCT00000000.1
Pseudomonas bohemica	IA19 = LMG 30182	NKHL00000000.1	NKHL00000000.1
Pseudomonas borbori	DSM 17834 = LMG 23199	FN554456.1	FOWX00000000.1
Pseudomonas brassicacearum subsp. brassicacearum	DBK11 = DSM 13227 = CFBP 11706	AM084334.1	LT629713.1
Pseudomonas brenneri	DSM 15294	FN554457.1	LT629800.1
Pseudomonas caeni	HY-14 = CECT 7778 = LMG 24390	HE800491.1	ATXQ00000000.1
Pseudomonas canadensis	2-92 = LMG 28499	AYTD00000000.1	AYTD00000000.1
Pseudomonas cannabina	CFBP 2341 = LMG 5096 = ICMP 2823	FN554458.1	LJPX00000000.1
Pseudomonas caricapapayae	LMG 2152 = ICMP 2855	AB039507.1	LJPW00000000.1
Pseudomonas caspiana	FBF102 = CECT 9164	HG805592.1	LOHF00000000.1
Pseudomonas cedrina subsp. cedrina	CFML 96-198 = DSM 17516	FN554459.1	LT629753.1
Pseudomonas cedrina subsp. fulgida	DSM 14938 = LMG 21467	HE586449.1	-
Pseudomonas cerasi	LMG 28609	LT222319.1	LT222319.1
Pseudomonas chengduensis	MBR = DSM 26382	JX042517.1	FMZQ00000000.1
Pseudomonas chloritidismutans	AW-1 = DSM 13592	AOFQ00000000.1	AOFQ00000000.1
Pseudomonas chlororaphis subsp. aurantiaca	NCIB 10068 = LMG 21630	FN554452.1	LT629747.1
Pseudomonas chlororaphis subsp. aureofaciens	DSM 6698 = LMG 1245 = ATCC 13985	FN554453.1	LT629738.1
Pseudomonas chlororaphis subsp. chlororaphis	DSM 50083 = ATCC 9446	AB039549.1	CP027712.1
Pseudomonas chlororaphis subsp. piscium	DSM 21509	LT629761.1	LT629761.1
Pseudomonas cichorii	ATCC 10857	AB039526.1	FNIK00000000.1
Pseudomonas citronellolis	LMG 18378	AB039604.1	FOLS00000000.1
Pseudomonas coleopterorum	CECT 8695 = LMG 28558	KM888187.1	FNTZ00000000.1
Pseudomonas composti	C2 = CCUG 59231	FR716577.1	FOWP00000000.1
Pseudomonas congelans	LMG 21466 = DSM 14939	FN554460.1	FNJH00000000.1
Pseudomonas coronafaciens	NCPPB 600 = LMG 5060	JSED00000000.1	JSED00000000.1
Pseudomonas corrugata	ATCC 29736 = NCPPB 2445	AB039566.1	LIGR00000000.1
Pseudomonas costantinii	LMG 22119	FN554461.1	MDDR00000000.1
Pseudomonas cremoricolorata	DSM 17059	FN554462.1	AUEA00000000.1
Pseudomonas crudilactis	UCMA 17988	WXVV00000000.1	WXVV00000000.1
Pseudomonas cuatrocienegasensis	CIP 109853	FOFP00000000.1	FOFP00000000.1
Pseudomonas deceptionensis	DSM 26521 = CECT 7677	GU936596.1	JYKX00000000.1
Pseudomonas delhiensis	RLD-1 = MTCC 7601	HE800493.1	FNEC00000000.1
Pseudomonas donghuensis	HYS = DSM 101685	AJJP00000000.1	AJJP00000000.1
Pseudomonas duriflava	CGMCC 1.6858 = KCTC 22129	HE800494.1	VLKY00000000.1
Pseudomonas endophytica	BSTT44;CECT 8691T	LN624763.1	LLWH00000000.1
Pseudomonas entomophila	L48T	CT573326.1	CT573326.1
Pseudomonas extremaustralis	DSM 17835	JN814374.1/HE800495.1	LT629689.1
Pseudomonas extremorientalis	LMG 19695	FN554464.1	MDGK00000000.1
Pseudomonas ficuserectae	ICMP 7848 = CCUG 32779	AB039501.1	LJQJ00000000.1
Pseudomonas flavescens	LMG 18387	FN554465.1	FNDG00000000.1
Pseudomonas flexibilis	ATCC 29606	JRUD00000000.1	JRUD00000000.1
Pseudomonas floridensis	GEV388 = LMG 30013	MUIO00000000.1	MUIO00000000.1
Pseudomonas fluorescens	DSM 50090 = ATCC 13525	AB039545.1	LHVP00000000.1
Pseudomonas fluvialis	ASS-1 = KCTC 52437	NMQV00000000.1	NMQV00000000.1
Pseudomonas formosensis	JCM 18415	FOYD00000000.1	FOYD00000000.1
Pseudomonas fragi	CECT 446	FN554466.1	LT629783.1
Pseudomonas frederiksbergensis	LMG 19851 = DSM 13022	AM084335.2	FNTF00000000.1
Pseudomonas fulva	ATCC 31418 = CIP 106765	AB039586.1	BBIQ00000000.1
Pseudomonas furukawaii	KF707 = DSM 10086	AP014862.1	AP014862.1
Pseudomonas fuscovaginae	LMG 2158	FN554467.1	LT629972.1
Pseudomonas gallaeciencis	V113	FN994225.2	LMAZ00000000.1
Pseudomonas gessardii	LMG 21604 = DSM 105469	FN554468.1	FNKR00000000.1
Pseudomonas graminis	LMG 21661	FN554469.1	FOHW00000000.1
Pseudomonas granadensis	DSM 28040 = LMG 27940	HG764748.1	LT629778.1
Pseudomonas grimontii	ATCC BAA-140	FN554470.1	FNKM00000000.1
Pseudomonas guangdongensis	CCTCC 2012022	LT629780.1	LT629780.1
Pseudomonas guariconensis	PCAVU11 = LMG 27394	HF674460.1/LN851842.1	FMYX00000000.1
Pseudomonas guguanensis	CC-G9V = JCM 18416	FNJJ00000000.1	FNJJ00000000.1
Pseudomonas guineae	M8 = LMG 24016	FN554471.1	FOQL00000000.1
Pseudomonas haemolytica	DSM 108988	VOIX00000000.1	VOIX00000000.1
Pseudomonas helleri	DSM 29165	JYLD00000000.1	JYLD00000000.1
Pseudomonas helmanticensis	LMG 28168 = CECT 8548	HG940517.1	2617270757*
Pseudomonas humi	CCA1 = HUT 8136	BDGS00000000.1	BDGS00000000.1
Pseudomonas hussainii	JCM 19513	FOAS00000000.1	FOAS00000000.1
Pseudomonas indica	LMG 23066	FN554472.1	FNFD00000000.1
Pseudomonas indoloxydans	JCM 14246	AB548146/HE800496.1	QASO00000000.1
Pseudomonas inefficax	DSM 108619	OPYN00000000.1	OPYN00000000.1
Pseudomonas japonica	JCM 21532	HE577795.1	FZOL00000000.1
Pseudomonas jessenii	ATCC 700870 = CIP 105274	FN554473.1	FNTC00000000.1
Pseudomonas jinjuensis	JCM 21621 = LMG 21316	FN554474.1	FNIJ00000000.1
Pseudomonas kairouanensis	KC12 = CECT 9766	LR130152.1	QUZU00000000.1
Pseudomonas kilonensis	DSM 13647	AM084336.1	LHVH00000000.1
Pseudomonas knackmussii	LMG 23759	FN554475.1	HG322950.1
Pseudomonas koreensis	LMG 21318	FN554476.1	LT629687.1
Pseudomonas kribbensis	DSM 100278	CP029608.1	CP029608.1
Pseudomonas kunmingensis	DSM 25974	FORS00000000.1	FORS00000000.1
Pseudomonas kuykendallii	NRRL B-59562	FNNU00000000.1	FNNU00000000.1
Pseudomonas lactis	DSM 29167	JYLO00000000.1	JYLO00000000.1
Pseudomonas laurylsulfatiphila	AP3_16 = DSM 105097	NIRS00000000.1	NIRS00000000.1
Pseudomonas laurylsulfatovorans	AP3_22 = DSM 105098	MUJK00000000.1	MUJK00000000.1
Pseudomonas libanensis	CIP 105460	FN554477.1	LT629699.1
Pseudomonas lini	CFBP 5737 = CIP 107460	FN554478.1	LT629746.1
Pseudomonas linyingensis	LMG 25967	FNZE00000000.1	FNZE00000000.1
Pseudomonas litoralis	2SM5 = CECT 7670	FN908485.1	LT629748.1
Pseudomonas lundensis	ATCC 49968 = LMG 13517	FN554479.1	JYKY00000000.1
Pseudomonas lurida	P 513/18 = DSM 15835 = LMG 21995	HE800497.1	PDJB00000000.1
Pseudomonas lutea	DSM 17257	-	JRMB00000000.1
Pseudomonas luteola	JCM 3352	FN554481.1	FOEV00000000.1
Pseudomonas mandelii	LMG 21607	FN554482.1	LT629796.1
Pseudomonas mangrovi	TC-11 = KCTC 62159	QASN00000000.1	QASN00000000.1
Pseudomonas marginalis	ATCC 10844	AB039575.1	FNSU00000000.1
Pseudomonas marincola	JCM 14761	FN554483.1	FPBC00000000.1
Pseudomonas massiliensis	CB1 = DSM 29075	CCYK00000000.1	CCYK00000000.1
Pseudomonas mediterranea	CFBP 5447 = DSM 16733	AM084337.1	LT629790.1
Pseudomonas meliae	ICMP 6289	LJQT00000000.1	LJQT00000000.1
Pseudomonas mendocina	ATCC 25411 = NCTC 10897	AJ633567.1	BBQC00000000.1
Pseudomonas migulae	CCUG 43165	FN554486.1	FNTY00000000.1
Pseudomonas mohnii	DSM 18327 = CCUG 53115	FN554487.1	FNRV00000000.1
Pseudomonas monteilii	ATCC 700476 = DSM 14164	FN554488.1	JHYV00000000.1
Pseudomonas moorei	CCUG 53114	FN554489.1	FNKJ00000000.1
Pseudomonas moraviensis	DSM 16007	FN554490.1	LT629788.1
Pseudomonas mosselii	ATCC BAA-99	FN554491.1	JHYW00000000.1
Pseudomonas mucidolens	LMG 2223	AB039546.1	LT629802.1
Pseudomonas nabeulensis	E10B = CECT 9765	LR130158.1	QUZT00000000.1
Pseudomonas nitroreducens	LMG 21614 = ATCC 33634	FN554492.1	FZOM00000000.1
Pseudomonas oceani	DSM 100277	KU187948.1	PPSK00000000.1
Pseudomonas oleovorans subsp. oleovorans	DSM 1095 = ATCC 8062	AB039601.1	NIUB00000000.1
Pseudomonas orientalis	BS2775 = DSM 17489	FN554493.1	LT629782.1
Pseudomonas oryzae	KCTC 32247	LT629751.1	LT629751.1
Pseudomonas oryzihabitans	NBRC 102199 = ATCC 43272	FN554494.1	BBIT00000000.1
Pseudomonas otitidis	DSM 17224	FN554495.1	FOJP00000000.1
Pseudomonas pachastrellae	JCM 12285 = CCUG 46540	FN554496.1	FOUD00000000.1
Pseudomonas palleroniana	BS3265 = LMG 23076	FN554497.1	FNUA00000000.1
Pseudomonas panacis	BS2778 = CIP 108524	FN554498.1	FNSP00000000.1
Pseudomonas panipatensis	CCM 7469	FN554499.1	FNDS00000000.1
Pseudomonas parafulva	DSM 17004	FN554500.1	AUEB00000000.1
Pseudomonas paralactis	DSM 29164	JYLN00000000.1	JYLN00000000.1
Pseudomonas pelagia	CL-AP6 = JCM 15562	FN908495.1	AROI00000000.1
Pseudomonas peli	DSM 17833 = LMG 23201	FN554501.1	FMTL00000000.1
Pseudomonas perfectomarina	ATCC 14405 = CCUG 16156	AGSL00000000.1	AGSL00000000.1
Pseudomonas persica	LMG 29757	OLKL00000000.1	OLKL00000000.1
Pseudomonas pertucinogena	LMG 1874	FN554502.1	2571042921*
Pseudomonas pharmacofabricae	ZYSR67-Z	PIYS00000000.1	PIYS00000000.1
Pseudomonas plecoglossicida	DSM 15088 = ATCC 700383 = CIP 106493	FN554503.1	BBIV00000000.1
Pseudomonas poae	BS2776 = LMG 21465 = DSM 14936	FN554504.1	LT629706.1
Pseudomonas pohangensis	DSM 17875	LT629785.1	LT629785.1
Pseudomonas profundi	M5 = KCTC 62119	VTPZ00000000.1	VTPZ00000000.1
Pseudomonas prosekii	LMG 26867	JN814373.1	LT629762.1
Pseudomonas protegens	CHA0 = DSM 19095	X84416.1	CP003190.1
Pseudomonas proteolytica	BS2985 = CIP 108464	FN554505.1	FNTR00000000.1
Pseudomonas pseudoalcaligenes subsp. pseudoalcaligenes	NBRC 14167	AB039602.1	BDAJ00000000.1
Pseudomonas psychrophila	BS3667 = DSM 17535	FN554506.1	LT629795.1
Pseudomonas psychrotolerans	DSM 15758 = LMG 21977	FN554507.1	FMWB00000000.1
Pseudomonas punonensis	CECT 8089	FRBQ00000000.1	FRBQ00000000.1
Pseudomonas putida	NBRC 14164 = ATCC 12633	AB039581.1	AP013070.1
Pseudomonas pyomelaminifaciens	MR 02	PESJ00000000.1	PESJ00000000.1
Pseudomonas qingdaonensis	JJ3 = JCM 32579	PHTD00000000.1	PHTD00000000.1
Pseudomonas reidholzensis	CCOS 865	LT009713.1	UNOZ00000000.1
Pseudomonas reinekei	MT1 = CCUG 53116	FN554508.1	MSTQ00000000.1
Pseudomonas resinovorans	DSM 21078 = LMG 2274	FN554509.1	AUIE00000000.1
Pseudomonas rhizosphaerae	DSM 16299 = LMG 21640	FN554510.1	CP009533.1
Pseudomonas rhodesiae	BS2777 = LMG 17764	FN554511.1	LT629801.1
Pseudomonas sabulinigri	JCM 14963 = KCTC 22137	FN908492.1	LT629763.1
Pseudomonas sagittaria	JCM 18195	FOXM00000000.1	FOXM00000000.1
Pseudomonas salegens	CECT 8338	LT629787.1	LT629787.1
Pseudomonas salina	XCD-X85 = JCM 19469	KP075009.1	VTTI00000000.1
Pseudomonas salomonii	LMG 22120	FN554512.1	MDFI00000000.1
Pseudomonas saponiphila	DSM 9751	HE800499.1	FNTJ00000000.1
Pseudomonas saudimassiliensis	12M76 = CSUR P1220	LK391969.1	LK391969.1
Pseudomonas saudiphocaensis	20 BN = CSUR P1224	CCSF00000000.1	CCSF00000000.1
Pseudomonas savastanoi	ICMP4352 = LMG 2209	AB039514.1	LJRJ00000000.1
Pseudomonas sediminis	PI11 = DSM 100245	NIQU00000000.1	NIQU01000000.1
Pseudomonas segetis	CIP 108523 = IMSNU 14101	HE800500.1	FZOG00000000.1
Pseudomonas seleniipraecipitans	LMG 25475	HE800501.1	FNBM00000000.1
Pseudomonas shirazica	LMG 29953	OLKI00000000.1	OLKI00000000.1
Pseudomonas sichuanensis	WCHPs060039 = TC-11	QKVM00000000.1	QKVM00000000.1
Pseudomonas sihuiensis	KCTC 32246	LT629797.1	LT629797.1
Pseudomonas silesiensis	A3 = DSM 103370	CP014870.1	CP014870.1
Pseudomonas simiae	Oli = CCUG 50988	FN554513.1	MDFH00000000.1
Pseudomonas soli	LMG 27941	HF930597.1	FOEQ00000000.1
Pseudomonas songnenensis	NEAU-ST5-5	KP151498.1	RFFN00000000.1
Pseudomonas straminea	JCM 2783 = LMG 21615	AB039600.1	FOMO00000000.1
Pseudomonas stutzeri	CGMCC 1.1803 = ATCC 17588	AJ631316.1	CP002881.1
Pseudomonas synxantha	LMG 2190 = ATCC 9890	AB039550.1	LT629786.1
Pseudomonas syringae	NCPPB 281	AB039516.1	JALK00000000.1
Pseudomonas taeanensis	MS-3 = KCTC 22612	HE800502.1	AWSQ00000000.1
Pseudomonas taetrolens	LMG 2336	AB039523.1	JYLA00000000.1
Pseudomonas taiwanensis	DSM 21245	HE577796.1	AUEC00000000.1
Pseudomonas thermotolerans	DSM 14292 = CIP 107795	FN554514.1	AQPA00000000.1
Pseudomonas thivervalensis	DSM 13194 = CFBP 11261	AM084338.2	LHVE00000000.1
Pseudomonas tolaasii	ATCC 33618 = NCPPB 2192	AB039561.1	PHHD00000000.1
Pseudomonas toyotomiensis	NCIMB 14511 = JCM 15604	AB548145.1	FOXK00000000.1
Pseudomonas tremae	ICMP 9151 = LMG 22121	DQ072714.1/FN554463.1	LJRO00000000.1
Pseudomonas trivialis	DSM 14937 = LMG 21464	FN554515.1	JYLK00000000.1
Pseudomonas tuomuerensis	JCM 14085 = CECT 7766	AB571152.1	JTAK00000000.1
Pseudomonas turukhanskensis	IB-1.1 = CECT 9091	LT219438.1	-
Pseudomonas umsongensis	BS3657 = LMG 21317	FN554516.1	LT629767.1
Pseudomonas urumqiensis	T3 = JCM 32830	RBZQ00000000.1	RBZQ00000000.1
Pseudomonas vancouverensis	BS3656 = ATCC 700688	FN554517.1	LT629803.1
Pseudomonas veronii	DSM 11331 = LMG 17761	FN554518.1	JYLL00000000.1
Pseudomonas versuta	L10.10 = LMG 29628	KY264773.1	CP012676.1
Pseudomonas viridiflava	ICMP 2848 = ATCC 13223	AB039520.1	LJRS00000000.1
Pseudomonas vranovensis	DSM 16006	HE577793.1	AUED00000000.1
Pseudomonas wadenswillerensis	CCOS 864	UIDD00000000.1	UIDD00000000.1
Pseudomonas weihenstephanensis	DSM 29166	JYLF00000000.1	JYLF00000000.1
Pseudomonas xanthomarina	LMG 23572 = CCUG 46543	AM905872.1	LT629970.1
Pseudomonas xiamenensis	JCM 13530	EF596884.1	2576861402*
Pseudomonas xinjiangensis	NRRLB-51270	LT629736.1	LT629736.1
Pseudomonas yamanorum	LMG 27247	LT629793.1	LT629793.1
Pseudomonas yangmingensis	DSM 24213	FOUI00000000.1	FOUI00000000.1
Pseudomonas zeshuii	KACC 15471	FQYS00000000.1	FQYS00000000.1
Pseudomonas zhaodongensis	DSM 27559	KP151499.1	RFFM00000000.1
Azomonas agilis	DSM 375	VLKG00000000.1	VLKG00000000.1
Azotobacter beijerinckii	ICMP 8673	FOFJ00000000.1	FOFJ00000000.1
Azotobacter chroococcum	ATCC 9043	SJAA00000000.1	SJAA00000000.1
Cellvibrio japonicus	Ueda107	CP000934.1	CP000934.1
Entomomonas moraniae	QZS01	CP029822.1	CP029822.1
Escherichia coli	ATCC 11775 = DSM 30083	CP033092.2	CP033092.2
Oblitimonas alkaliphila	B4199	CP012358.1	CP012358.1
Thiopseudomonas denitrificans	DSM 28679	SNYK00000000.1	SNYK00000000.1
Ventosimonas gracilis	CV58	LSZO00000000.1	LSZO00000000.1
* IMG genome ID

## Sheet: TableS2_IDRpoDEnvStrains
Isolate	Origin	Group/Subgroup	Closest species	% Similarity rpoD	Classification	NCBI Accession number
RD4SR1	Exorhizosphere rice, Anuradhapura, Sri Lanka	P. putida	P. asiatica	99.69	P. asiatica	MT621463
RD9PR3	Rhizoplane rice, Anuradhapura, Sri Lanka			99.69		MT621464
RD5PR1	Rhizoplane rice, Anuradhapura, Sri Lanka			99.85		MT621465
RD1SR1	Exorhizosphere rice, Anuradhapura, Sri Lanka			99.85		MT621466
RD2SR3	Exorhizosphere rice, Anuradhapura, Sri Lanka			99.54		MT621467
RD7SR1	Exorhizosphere rice, Anuradhapura, Sri Lanka			99.69		MT621468
RD1PR2	Rhizosphere rice, Anuradhapura, Sri Lanka			99.69		MT621469
RD9PR1	Rhizoplane rice, Anuradhapura, Sri Lanka			99.54		MT621470
RD3SR1	Exorhizosphere rice, Anuradhapura, Sri Lanka			99.69		MT621471
RD8SR1	Exorhizosphere rice, Anuradhapura, Sri Lanka		P. inefficax	94.92	Pseudomonas sp. #1	MT621456
RD8PR2	Rhizoplane rice, Anuradhapura, Sri Lanka			94.92		MT621457
RD8PR3	Rhizoplane rice, Anuradhapura, Sri Lanka			94.92		MT621458
RD8MR3*	Endorhizosphere rice, Anuradhapura, Sri Lanka			94.92		MT621460/JABWSA000000000
RD5PR2	Rhizoplane rice, Anuradhapura, Sri Lanka			93.53		MT621459
RD9SR1*	Exorhizosphere rice, Anuradhapura, Sri Lanka		P. inefficax	94.76	Pseudomonas sp. #2	MT621461/JABWRZ000000000
RD6SR1	Exorhizosphere rice, Anuradhapura, Sri Lanka			94.3		MT621462
RW1P2*	Rhizoplane rice, Kurunegala, Sri Lanka		P. monteilii	98	Pseudomonas sp. #3	MT621449/JABWSB000000000
SWRI1	Wheat rhizosphere, Zanjan, Iran		P. alloputida	99.69	P. alloputida	MT621450
SWRI115	Wheat rhizosphere, Kermanshah, Iran			100		MT621451
SWRI39	Wheat rhizosphere, Kermanshah, Iran			100		MT621452
SWRI182	Wheat rhizosphere, Tehran, Iran			100		MT621455
SWRI90	Wheat rhizosphere, Zanjan, Iran			99.85		MT621453
SWRI91	Wheat rhizosphere, Zanjan, Iran			99.85		MT621454
SWRI35	Wheat rhizosphere, Kermanshah, Iran		P. putida	98.92	P. putida	MT621447
SWRI78	Wheat rhizosphere, Zanjan, Iran			98.77		MT621448
SWRI67*	Wheat rhizosphere, Hamedan, Iran		P. plecoglossicida	87.52	Pseudomonas sp. #4	MT621422/JABWRX000000000
SWRI100*	Wheat rhizosphere, Kermanshah, Iran			87.52		MT621423/JABWRY000000000
SWRI50*	Wheat rhizosphere, Zanjan, Iran			87.52		MT621424/JABWRW000000000
SWRI68*	Wheat rhizosphere, Shiraz, Iran		P. monteilii	88.29	Pseudomonas sp. #5	MT621425/JABWRU000000000
SWRI77*	Wheat rhizosphere, Zanjan, Iran			88.29		MT621426/JABWRV000000000
SWRI59*	Wheat rhizosphere, Salmas, Iran			88.29		MT621427/JABWRT000000000
RW3S1*	Exorhizosphere rice, Kurunegala, Sri Lanka		P. parafulva	86.98	Pseudomonas sp. #6	MT621434/JABWRN000000000
RW3S2*	Exorhizosphere rice, Kurunegala, Sri Lanka			86.98		MT621435/JABWRM000000000
RW10S2*	Exorhizosphere rice, Kurunegala, Sri Lanka			86.83		MT621436/JABWRO000000000
RW5S2*	Exorhizosphere rice, Kurunegala, Sri Lanka		P. mosselii	99.85	P. mosselli	MT621439/JABWRL000000000
BW11M1*	Banana plant exorhizosphere, Galagedara, Sri Lanka			99.69		MT621440/LSLE00000000.1
BW18S1*	Banana plant rhizosphere, Colombo, Sri Lanka			99.23		MT621441/JABWRK000000000
RW9S1A*	Exorhizosphere rice, Kurunegala, Sri Lanka		P. mosselii	93.25	Pseudomonas sp. #7	MT621442/JABWRH000000000
BW16S1	Banana plant exorhizosphere, Peradeniya, Sri Lanka		P. entomophila	95.84	Pseudomonas sp. #8	MT621443
BW16S3	Banana plant exorhizosphere, Peradeniya, Sri Lanka			95.38		MT621444
BW13M1*	Banana plant endorhizosphere, Peradeniya, Sri Lanka			95.38		MT621446/JABWRJ000000000
BW16M2*	Banana plant endorhizosphere, Peradeniya, Sri Lanka			94.92		MT621445/JABWRI000000000
RW2S1*	Exorhizosphere rice, Kurunegala, Sri Lanka		P. taiwanensis	100	P. taiwanensis	MT621438/JABWRR000000000
RW7P2*	Rhizoplane rice, Kurunegala, Sri Lanka			100		MT621437/JABWRS000000000
RW4S2*	Exorhizosphere rice, Kurunegala, Sri Lanka		P. putida	87.85	Pseudomonas sp. #9	MT621428/JABWRP000000000
RW4P2	Rhizoplane rice, Kurunegala, Sri Lanka			87.85		MT621429
RW10S1*	Exorhizosphere rice, Kurunegala, Sri Lanka		P. putida	86.00	Pseudomonas sp. #10	MT621430/JABWRQ000000000
RW10P3b	Rhizoplane rice, Kurunegala, Sri Lanka			86.00		MT621431
RW9S2	Exorhizosphere rice, Kurunegala, Sri Lanka			86.15		MT621432
RW7S1	Exorhizosphere rice, Kurunegala, Sri Lanka			86.46		MT621433
SWRI10*	Wheat rhizosphere, West Azerbaijan, Iran		P. reidholzensis	92.91	Pseudomonas sp. #11	MT621419/JABWRE000000000
SWRI9	Wheat rhizosphere, West Azerbaijan, Iran			92.91		MT621420
SWRI34	Wheat rhizosphere, Kermanshah, Iran			92.14		MT621421
SWRI53	Wheat rhizosphere, Zanjan, Iran		P. reidholzensis	85.87	Pseudomonas sp. #12	MT621415
SWRI56*	Wheat rhizosphere, Shiraz, Iran			85.56		MT621418/JABWRD000000000
SWRI147	Wheat rhizosphere, Hamedan, Iran			85.87		MT621416
SWRI41	Wheat rhizosphere, Kermanshah, Iran			85.87		MT621417
SWRI97	Wheat rhizosphere, Kermanshah, Iran		P. sichuanensis	83.82	Pseudomonas sp. #13	MT621409
SWRI98	Wheat rhizosphere, Kermanshah, Iran			83.82		MT621410
SWRI107*	Wheat rhizosphere, Shiraz, Iran			83.82		MT621411/JABWRF000000000
SWRI51*	Wheat rhizosphere, Zanjan, Iran			83.82		MT621412/JABWRG000000000
SWRI40	Wheat rhizosphere, Kermanshah, Iran			83.36		MT621413
SWRI101	Wheat rhizosphere, Kermanshah, Iran			84.13		MT621414
RW8P3*	Rhizoplane rice, Kurunegala, Sri Lanka	P. asplenii	P. asplenii	89.55	Pseudomonas sp. #14	MT621472/JABWRC000000000
BW11P2*	Banana plant exorhizosphere, Galagedara, Sri Lanka	P. koreensis	P. kribbensis	91.06	Pseudomonas sp. #15	MT621496/LRUN00000000.1
SWRI54*	Wheat rhizosphere, Shiraz, Iran		P. moraviensis	96.28	Pseudomonas sp. #16	MT621504/JABWQU000000000
SWRI19	Wheat rhizosphere, Kermanshah, Iran			95.98		MT621505
SWRI28	Wheat rhizosphere, Kermanshah, Iran			97.37		MT621506
PGSB 7839	Maize rhizosphere, Belgium		P. moraviensis	100	P. moraviensis	MT621507
SWRI153*	Wheat rhizosphere, Khorasan, Iran		P. moraviensis	97.06	Pseudomonas sp. #17	MT621508/JABWQP000000000
SWRI185	Wheat rhizosphere, Iran			96.75		MT621509
SWRI162	Wheat rhizosphere, Khorasan, Iran			96.75		MT621510
SWRI99*	Wheat rhizosphere, Kermanshah, Iran		P. moraviensis	95.99	Pseudomonas sp. #18	MT621511/JABWQR000000000
SWRI113	Wheat rhizosphere, Kermanshah, Iran			96.44		MT621513
SWRI111*	Wheat rhizosphere, Kermanshah, Iran			96.44		MT621512/JABWQQ000000000
SWRI65*	Wheat rhizosphere, Hamedan, Iran			96.13		MT621514/JABWQT000000000
SWRI200	Wheat rhizosphere, Tehran, Iran			96.59		MT621515
SWRI81*	Wheat rhizosphere, Hamedan, Iran			95.84		MT621516/JABWQS000000000
SWRI33	Wheat rhizosphere, Kermanshah, Iran			95.22		MT621517
OE 48.2*	Maize rhizosphere, Belgium		P. crudilactis	96.74	Pseudomonas sp. #19	MT621498/JABWQO000000000
OE 49.2	Maize rhizosphere, Belgium			96.58		MT621499
PGSB 7947	Maize rhizosphere, Belgium			96.27		MT621500
ZA 5.3*	Wheat rhizosphere, Belgium		P. crudilactis	96.89	Pseudomonas sp. #20	MT621501/JABWQN000000000
PGSB 8569	Maize rhizosphere, Belgium		P. crudilactis	99.38	P. crudilactis	MT621497
SWRI189	Wheat rhizosphere, Tehran, Iran		P. granadensis	99.85	P. granadensis	MT621502
SWRI129	Wheat rhizosphere, Kermanshah, Iran			98.3		MT621503
PGSB 8459*	Maize rhizosphere, Belgium		P. koreensis	94.61	Pseudomonas sp. #21	MT621495/JABXFC000000000
PGSB 8162	Maize rhizosphere, Belgium	P. jessenii	P. jessenii	99.69	P. jessenii	MT621520
OE 47.1	Maize rhizosphere, Belgium		P. umsongensis	98.61	P. umsongensis	MT621518
OE 55.7	Maize rhizosphere, Belgium			98.61		MT621519
SWRI12*	Wheat rhizosphere, Zanjan, Iran	P. corrugata	P. brassicacearum	95.98	Pseudomonas sp. #22	MT621484/JABWRB000000000
SWRI15	Wheat rhizosphere, Zanjan, Iran			95.98		MT621485
SWRI13	Wheat rhizosphere, West Azerbaijan, Iran			96.28		MT621486
SWRI110	Wheat rhizosphere, Kermanshah, Iran			96.13		MT621487
SWRI179*	Wheat rhizosphere, Tehran, Iran			96.13		MT621488/JABWRA000000000
SWRI108*	Wheat rhizosphere, Kermanshah, Iran		P. kilonensis	95.41	Pseudomonas sp. #23	MT621493/JABWQZ000000000
SWRI122	Wheat rhizosphere, East Azerbaijan, Iran			95.41		MT621494
PGSB 8167	Maize rhizosphere, Belgium		P. thivervalensis	99.23	P. thivervalensis	MT621482
PGSB 8423	Maize rhizosphere, Belgium			99.23		MT621483
SWRI196*	Wheat rhizosphere, Tehran, Iran		P. thivervalensis	94.27	Pseudomonas sp. #24	MT621473/JABWQV000000000
SWRI11	Wheat rhizosphere, West Azerbaijan, Iran			94.27		MT621474
SWRI121	Wheat rhizosphere, East Azerbaijan, Iran			93.65		MT621475
SWRI8	Wheat rhizosphere, West Azerbaijan, Iran			94.27		MT621476
SWRI4	Wheat rhizosphere, West Azerbaijan, Iran			94.27		MT621477
SWRI150	Wheat rhizosphere, Khorasan, Iran			93.81		MT621478
SWRI164	Wheat rhizosphere, Khorasan, Iran			93.81		MT621479
SWRI21	Wheat rhizosphere, Kermanshah, Iran			93.96		MT621481
SWRI155	Wheat rhizosphere, Khorasan, Iran			93.81		MT621480
SWRI92*	Wheat rhizosphere, Zanjan, Iran		P. brassicacearum	92.88	Pseudomonas sp. #25	MT621489/JABWQY000000000
SWRI102*	Wheat rhizosphere, Kermanshah, Iran			92.88		MT621490/JABWQX000000000
SWRI16	Wheat rhizosphere, Zanjan, Iran			92.57		MT621491
SWRI154*	Wheat rhizosphere, Khorasan, Iran			92.11		MT621492/JABWQW000000000
SWRI52*	Wheat rhizosphere, Zanjan, Iran	P. gessardii	P. gessardii	96.92	Pseudomonas sp. #26	MT621521/JABWQM000000000
SWRI141	Wheat rhizosphere, Kermanshah, Iran		P. proteolytica	99.08	P. proteolytica	MT621522
SWRI142	Wheat rhizosphere, Kermanshah, Iran			99.08		MT621523
SWRI104*	Wheat rhizosphere, Shiraz, Iran			99.38		MT621524/JABWQL000000000
SWRI86	Wheat rhizosphere, Kermanshah, Iran	P. fluorescens	P. cedrina subsp. cedrina	98.92	P. cedrina subsp. cedrina	MT621532
SWRI172	Wheat rhizosphere, Khorasan, Iran			98.92		MT621533
SWRI188	Wheat rhizosphere, Iran			98.92		MT621534
SWRI18*	Wheat rhizosphere, Kermanshah, Iran			98.92		MT621535/JACCQQ000000000
SWRI103*	Wheat rhizosphere, Shiraz, Iran		P. cedrina subsp. cedrina	98.61	Pseudomonas sp. #27	MT621536/JABBCM000000000
SWRI145*	Wheat rhizosphere, Zanjan, Iran		P. cedrina subsp. fulgida	93.53	Pseudomonas sp. #28	MT621537/JABWQF000000000
SWRI195	Wheat rhizosphere, Iran			93.53		MT621538
SWRI144*	Wheat rhizosphere, Zanjan, Iran			93.53		MT621539/JABWQG000000000
OE 51.3	Maize rhizosphere, Belgium		P. veronii	99.38	P. veronii	MT621551
SWRI2*	Wheat rhizosphere, West Azerbaijan, Iran		P. poae	99.54	P. poae	MT621550/JABWQH000000000
SWRI70*	Wheat rhizosphere, Shiraz, Iran		P. paralactis	99.23	P. paralactis	MT621549/JABWQI000000000
SWRI126*	Wheat rhizosphere, Salmas, Iran		P. lactis	98.92	Pseudomonas sp. #29	MT621526/JABWQJ000000000
SWRI22*	Wheat rhizosphere, Kermanshah, Iran		P. lactis	97.99	Pseudomonas sp. #30	MT621525/JABWQK000000000
OE 28.3*	Wheat rhizosphere, Belgium		P. salomonii	98.31	Pseudomonas sp. #31	MT621540/JABWQB000000000
PGSB 8273*	Maize rhizosphere, Belgium		P. lurida	99.85	P. lurida	MT621527/JABWQE000000000
PGSB 3962*	Maize rhizosphere, Belgium			99.69		MT621530/JABWQC000000000
PGSB 7828*	Maize rhizosphere, Belgium			99.54		MT621528/JABWQD000000000
PGSB 7861	Maize rhizosphere, Belgium			99.38		MT621529
SWRI187	Wheat rhizosphere, Tehran, Iran		P. canadensis	98.46	P. canadensis	MT621531
SWRI177	Wheat rhizosphere, Khorasan, Iran		P. simiae	99.38	P. simiae	MT621541
SWRI201	Wheat rhizosphere, Iran			99.38		MT621542
SWRI128	Wheat rhizosphere, West Azerbaijan, Iran			99.38		MT621543
SWRI5	Wheat rhizosphere, West Azerbaijan, Iran			99.38		MT621544
SWRI83	Wheat rhizosphere, Kermanshah, Iran			98.77		MT621545
SWRI157	Wheat rhizosphere, Khorasan, Iran			99.23		MT621546
SWRI133	Wheat rhizosphere, Khoy, Iran			99.38		MT621547
SWRI175	Wheat rhizosphere, Khorasan, Iran			99.54		MT621548
RW2P1	Rhizoplane rice, Kurunegala, Sri Lanka	P. resinovorans	P. otitidis	98.77	P. otitidis	MT621407
RW2P3	Rhizoplane rice, Kurunegala, Sri Lanka			98.93		MT621408
	* Indicates strains for which the genome was sequenced.

## Sheet: TableS3_%SimilarityRpoD
		1	2	3	4	5	6	7	8	9	10	11	12	13	14	15	16	17	18	19	20	21	22	23	24	25	26	27	28	29	30	31	32	33	34	35	36	37	38	39	40	41	42	43	44	45	46	47	48
1	Escherichia coli DSM 30083		49.7	42.6	43.19	44.07	41.69	43.48	44.44	44.17	45.12	46.38	45.12	44.97	44.12	46.61	46.76	47.57	47.57	47.57	44.97	43.15	45.07	45.96	45.52	44.48	45.45	45.36	48.22	47.56	47.56	49.33	48.52	48.01	48.45	48.3	44.82	45.94	45.27	45.12	45.27	45.87	43.82	45.18	44.61	43.59	43.73	43.59	45.28
2	Cellvibrio japonicus Ueda 107	49.7		43.61	43.76	41.4	46.23	44.07	45.83	45.39	47.91	50.37	49.48	48.44	49.41	50.45	49.11	49.85	48.37	48.67	49.03	47.77	47.55	47.79	47.94	46.13	46.84	47.33	52.17	51.86	51.35	52.84	52.62	51.64	52.24	52.69	50.97	52.39	49.03	47.68	47.98	50.22	48.14	50.3	47.49	48.52	47.34	47.63	47.86
3	Ventosimonas gracilis CV58	42.6	43.61		54.25	52.27	51.99	53.16	55.54	52.86	51.48	51.25	53.91	51.4	52.37	52.28	51.1	52.43	53.17	53.9	51.99	50.44	51.76	51.76	51.91	52.39	54.32	51.76	54.01	56.57	53.63	56.3	55.93	55.24	55.54	55.98	52.14	53.03	54.45	52.52	52.82	55.74	52.86	54.31	52.11	54.73	51.74	51.89	51.38
4	Azomonas agilis DSM 375	43.19	43.76	54.25		56.91	54.29	57.01	54.75	54.77	53.63	51.84	55.16	53.98	55.33	54.4	53.67	53.29	53.44	53.44	53.98	52.86	53.9	53.51	53.95	52.24	52.84	52.86	54.67	56.83	54.59	55.33	57.48	54.28	54.13	54.72	55.6	56.34	54.29	55.47	55.62	56.83	53.51	56.85	56.4	55.09	55.44	54.57	56.54
5	Entomomonas moraniae QZS01	44.07	41.4	52.27	56.91		50.96	54.55	47.23	47.14	46.26	47.45	47.44	45.83	46.4	47.08	46.79	48.18	48.18	48.32	46.71	43.88	47.01	44.98	46.43	42.51	46.81	44.83	46.91	49.93	47.28	46.99	48.82	45.24	45.24	45.1	46.12	46.71	48.9	48.75	48.9	47.96	48.77	45.44	46.46	48.05	50.36	49.35	46.11
6	Oblitimonas alkaliphila B4199	41.69	46.23	51.99	54.29	50.96		65.68	57.65	59.11	53.64	53.77	53.99	54.44	52.82	53.18	51.99	55.23	53.02	53.46	55.03	52.87	54.51	53.67	52.93	53.56	54.6	55.38	55.74	57.02	56.04	57.08	56.33	54.68	55.27	55.42	55.34	55.79	54.38	55.57	55.72	54.98	57.65	55.08	54.28	57.52	56.64	57.67	56.68
7	P. caeni CECT 7778	43.48	44.07	53.16	57.01	54.55	65.68		56.92	55.83	51.57	54.97	53.12	54.09	55.95	52.74	53.64	55.55	54.96	54.96	55.2	52.07	54.53	53.09	53.83	52.11	53.89	51.85	55.46	56.16	56.35	55.68	56.51	55.66	56.26	56.26	56.11	56.56	57.24	55.9	55.9	57.39	54.77	53.69	54.36	56.73	57.26	57.7	57.51
8	Thiopseudomonas denitrificans DSM 28679	44.44	45.83	55.54	54.75	47.23	57.65	56.92		60.53	57.02	57	58.55	56.93	56.21	59.65	57.88	56.47	57.5	57.5	58.11	55.96	57.62	57.5	58.22	59.62	58.22	58.09	58.22	57.71	57.69	59.17	57.48	58.26	58.11	58.41	55.83	55.98	54.88	55.33	55.33	59.14	56.24	59.21	57.14	59.18	57.43	58.02	59.48
9	P. hussainii JCM 19513	44.17	45.39	52.86	54.77	47.14	59.11	55.83	60.53		59.56	59.62	58.24	58.68	61.06	62.59	61.86	63	63.88	63.73	58.24	57.86	58.63	59.22	59.07	60.75	58.93	59.44	63.45	60.97	60.83	60.53	63.45	61.09	61.39	61.24	60.3	60.89	55.93	57.27	57.42	58.37	56.03	58.25	57.6	60.09	59.06	58.19	60.12
10	P. yangmingensis DSM 24213	45.12	47.91	51.48	53.63	46.26	53.64	51.57	57.02	59.56		66.57	65.15	65.2	66.87	67.88	68.03	67.02	67.32	67.32	67.12	66.06	71.3	71.26	73.68	70.45	69.58	67.48	65.45	64.86	63.03	65.15	65.91	64.86	65.31	65.46	62.35	63.25	59.28	59.58	59.88	63.5	59.25	62.63	60.8	61.7	59.46	60.06	62.3
11	P. salegens CECT 8338	46.38	50.37	51.25	51.84	47.45	53.77	54.97	57	59.62	66.57		75.08	74.09	72.4	70.85	70.39	71.21	71.21	71.51	75.68	71.71	70.95	69.57	69.87	69.64	68.22	67.78	67.27	64.71	63.84	67.17	65.76	64.86	65.16	65.01	64.16	65.21	63.55	63.86	63.86	63.76	62.13	65.28	63.95	65.13	64.99	64.84	64.24
12	P. pelagia JCM 15562	45.12	49.48	53.91	55.16	47.44	53.99	53.12	58.55	58.24	65.15	75.08		79.66	72.25	70.48	67.02	69.92	70.83	71.28	76.23	74.2	70.18	70.75	69.4	68.74	65.97	64.31	65.05	62.82	64.2	65.71	65.36	64.76	64.91	65.06	62.71	63.91	61.05	62.5	62.41	62.97	59.82	64.38	63.24	63.84	63.45	62.85	64.34
13	P. salina XCD-X85	44.97	48.44	51.4	53.98	45.83	54.44	54.09	56.93	58.68	65.2	74.09	79.66		71.41	69.49	69.03	69.62	69.47	69.62	76.76	71.23	70.09	69.61	68.11	68.2	66.77	65.11	67.22	64.81	63.03	65.91	63.58	64.8	64.65	65.11	61.99	63.05	59.28	60.63	60.63	61.93	60.42	61.79	61.81	65.23	62.56	62.85	64.84
14	P. sabulinigri KCTC 22137	44.12	49.41	52.37	55.33	46.4	52.82	55.95	56.21	61.06	66.87	72.4	72.25	71.41		72.63	71.58	73.61	73.31	73.31	73.15	71.02	70.68	71.04	69.85	69.44	68.66	68.07	66.62	63.62	66.67	66.97	66.47	67.97	67.82	67.97	65.47	65.92	61.95	62.56	63.01	62.43	61.34	65.23	62.72	62.87	61.69	62.87	64.84
15	P. aestusnigri GXO14	46.61	50.45	52.28	54.4	47.08	53.18	52.74	59.65	62.59	67.88	70.85	70.48	69.49	72.63		88.7	81.97	83.18	83.64	70.78	69.17	72.18	71.15	72.2	71.96	70.85	67.32	65.76	64.36	65.51	66.57	66.67	66.06	66.97	67.12	64.35	64.65	62.29	60.78	60.78	63.44	60.3	64.72	63.34	64.83	64.68	64.23	65.13
16	P. oceani DSM 100277	46.76	49.11	51.1	53.67	46.79	51.99	53.64	57.88	61.86	68.03	70.39	67.02	69.03	71.58	88.7		81.21	81.82	81.82	70.63	69.62	69.77	69.21	70.85	70.92	67.41	65.66	66.82	64.21	65.36	65.66	66.21	65.31	66.06	66.21	63.44	64.5	62.59	61.39	61.39	64.05	58.65	64.42	63.04	62.89	64.68	63.64	63.65
17	P. pachastrellae CCUG 46540	47.57	49.85	52.43	53.29	48.18	55.23	55.55	56.47	63	67.02	71.21	69.92	69.62	73.61	81.97	81.21		92.86	93.01	71.73	69.52	71.64	71.73	71.88	71.75	70.83	66.97	65.01	65.02	66.57	67.17	66.52	66.52	66.97	67.12	64.66	65.26	63.21	61.86	61.86	62.65	57.72	65.18	62.7	63.89	64.64	63.89	64.94
18	P. abyssi MT5	47.57	48.37	53.17	53.44	48.18	53.02	54.96	57.5	63.88	67.32	71.21	70.83	69.47	73.31	83.18	81.82	92.86		99.24	70.68	70.42	72.24	72.62	72.77	72.63	70.68	66.22	66.52	65.77	67.02	68.07	67.27	66.82	67.57	67.72	64.81	65.56	64.11	62.46	62.46	64.61	60.57	66.37	64.78	66.12	67.31	64.04	65.38
19	P. gallaeciencis V113	47.57	48.67	53.9	53.44	48.32	53.46	54.96	57.5	63.73	67.32	71.51	71.28	69.62	73.31	83.64	81.82	93.01	99.24		70.83	70.72	71.94	72.62	72.47	72.49	70.39	65.92	66.52	65.77	66.87	68.37	67.42	67.12	67.72	68.17	65.11	65.86	64.11	62.61	62.61	64.76	60.42	66.52	64.93	66.57	67.61	64.49	65.68
20	P. profundi M5	44.97	49.03	51.99	53.98	46.71	55.03	55.2	58.11	58.24	67.12	75.68	76.23	76.76	73.15	70.78	70.63	71.73	70.68	70.83		79.39	74.85	73.88	73.73	72.74	71.19	68.83	69.59	65.37	67.07	68.28	67.93	67.77	67.47	67.47	63.46	64.36	61.2	61.2	61.35	62.69	59.22	64.73	63.6	64.93	62.26	63.6	63.95
21	P. xinjiangensis NRRLB-51270	43.15	47.77	50.44	52.86	43.88	52.87	52.07	55.96	57.86	66.06	71.71	74.2	71.23	71.02	69.17	69.62	69.52	70.42	70.72	79.39		73.46	71.47	72.36	70.65	69.84	66.42	68.48	64.57	65.06	66.42	67.42	65.92	65.92	65.92	63.36	64.86	59.67	61.32	61.32	62.39	59.07	65.18	64.04	64.49	63.74	62.56	65.43
22	P. litoralis 2SM5	45.07	47.55	51.76	53.9	47.01	54.51	54.53	57.62	58.63	71.3	70.95	70.18	70.09	70.68	72.18	69.77	71.64	72.24	71.94	74.85	73.46		85.17	84.72	79.1	78.31	75.27	65.81	64.18	64.01	66.72	63.7	64.62	64.02	64.62	64.07	64.82	60.72	61.62	61.77	61.14	60.36	62.02	60.12	61.89	61.3	59.97	62.63
23	P. bauzanensis DSM 22558	45.96	47.79	51.76	53.51	44.98	53.67	53.09	57.5	59.22	71.26	69.57	70.75	69.61	71.04	71.15	69.21	71.73	72.62	72.62	73.88	71.47	85.17		90.47	80.75	77.41	74.7	65.17	64.43	63.68	66.67	65.17	65.03	65.18	65.33	63.6	63.89	58.33	59.38	59.38	62.46	60.06	62.59	60.85	60.7	60.41	60.12	62.61
24	P. saudimassiliensis 12M76	45.52	47.94	51.91	53.95	46.43	52.93	53.83	58.22	59.07	73.68	69.87	69.4	68.11	69.85	72.2	70.85	71.88	72.77	72.47	73.73	72.36	84.72	90.47		81.94	78.01	75.6	66.07	64.88	65.02	67.41	67.26	65.92	65.77	65.92	64.49	64.93	61.31	60.42	60.27	62.91	60.06	64.06	62.46	61.73	62.46	61.73	63.64
25	P. xiamenensis JCM 13530	44.48	46.13	52.39	52.24	42.51	53.56	52.11	59.62	60.75	70.45	69.64	68.74	68.2	69.44	71.96	70.92	71.75	72.63	72.49	72.74	70.65	79.1	80.75	81.94		80.75	76.12	66.72	65.24	64.19	66.57	66.12	65.68	65.38	65.53	64.55	64.84	59.76	62.13	61.83	61.95	59.41	63.54	62.68	62.54	60.35	61.66	64.29
26	P. formosensis JCM 18415	45.45	46.84	54.32	52.84	46.81	54.6	53.89	58.22	58.93	69.58	68.22	65.97	66.77	68.66	70.85	67.41	70.83	70.68	70.39	71.19	69.84	78.31	77.41	78.01	80.75		79.97	68.61	65.63	63.38	67.71	65.47	66.37	65.92	65.77	63.89	64.78	59.97	62.5	62.5	60.68	58.88	62.3	61	62.9	59.97	59.53	62.9
27	P. pertucinogena LMG 1874	45.36	47.33	51.76	52.86	44.83	55.38	51.85	58.09	59.44	67.48	67.78	64.31	65.11	68.07	67.32	65.66	66.97	66.22	65.92	68.83	66.42	75.27	74.7	75.6	76.12	79.97		65.16	63.38	63.95	65.76	63.35	63.21	63.36	63.51	64.02	64.47	61.71	63.81	63.81	62.28	58.21	61.52	59.32	61.24	59.02	59.02	63.31
28	P. aeruginosa DSM 50071	48.22	52.17	54.01	54.67	46.91	55.74	55.46	58.22	63.45	65.45	67.27	65.05	67.22	66.62	65.76	66.82	65.01	66.52	66.52	69.59	68.48	65.81	65.17	66.07	66.72	68.61	65.16		82.52	77.49	82.54	80.98	79.85	80.15	80.31	73.02	73.48	67.23	69.21	69.36	68.89	64.8	68.72	68.56	67.22	68.26	66.17	69.75
29	P. nitroreducens ATCC 33634	47.56	51.86	56.57	56.83	49.93	57.02	56.16	57.71	60.97	64.86	64.71	62.82	64.81	63.62	64.36	64.21	65.02	65.77	65.77	65.37	64.57	64.18	64.43	64.88	65.24	65.63	63.38	82.52		79.85	83.97	81.83	82.82	82.14	82.29	73.26	73.41	67.37	69.03	69.03	69.02	64.77	68.11	66.32	67.66	67.01	65.68	69.42
30	P. knackmussii LMG 23759	47.56	51.35	53.63	54.59	47.28	56.04	56.35	57.69	60.83	63.03	63.84	64.2	63.03	66.67	65.51	65.36	66.57	67.02	66.87	67.07	65.06	64.01	63.68	65.02	64.19	63.38	63.95	77.49	79.85		84.37	83.54	85.36	84.9	84.9	71.54	71.99	66.21	69.25	69.41	69.04	62.18	69.32	67.81	65.72	67.17	66.42	67.81
31	P. jinjuensis LMG 21316	49.33	52.84	56.3	55.33	46.99	57.08	55.68	59.17	60.53	65.15	67.17	65.71	65.91	66.97	66.57	65.66	67.17	68.07	68.37	68.28	66.42	66.72	66.67	67.41	66.57	67.71	65.76	82.54	83.97	84.37		84.77	86.13	87.52	87.67	73.06	73.67	70.62	71.39	71.54	67.37	64.75	69.77	68.41	68.26	68.52	67.92	69.9
32	P. panipatensis CCM 7469	48.52	52.62	55.93	57.48	48.82	56.33	56.51	57.48	63.45	65.91	65.76	65.36	63.58	66.47	66.67	66.21	66.52	67.27	67.42	67.93	67.42	63.7	65.17	67.26	66.12	65.47	63.35	80.98	81.83	83.54	84.77		84.2	84.82	84.66	72.87	73.48	67.23	68.9	69.05	69.5	63.9	69.92	69.16	67.81	67.92	68.82	70.64
33	P. delhiensis RLD-1	48.01	51.64	55.24	54.28	45.24	54.68	55.66	58.26	61.09	64.86	64.86	64.76	64.8	67.97	66.06	65.31	66.52	66.82	67.12	67.77	65.92	64.62	65.03	65.92	65.68	66.37	63.21	79.85	82.82	85.36	86.13	84.2		95.99	95.99	70.56	70.56	65.1	66.31	66.46	66.47	63.8	68.11	67.51	66.02	65.37	66.57	67.66
34	P. citronellolis LMG 18378	48.45	52.24	55.54	54.13	45.24	55.27	56.26	58.11	61.39	65.31	65.16	64.91	64.65	67.82	66.97	66.06	66.97	67.57	67.72	67.47	65.92	64.02	65.18	65.77	65.38	65.92	63.36	80.15	82.14	84.9	87.52	84.82	95.99		99.38	71.93	72.08	67.22	67.07	67.22	67.22	64.61	69.16	68.11	66.92	66.12	66.42	68.4
35	P. humi CCA1	48.3	52.69	55.98	54.72	45.1	55.42	56.26	58.41	61.24	65.46	65.01	65.06	65.11	67.97	67.12	66.21	67.12	67.72	68.17	67.47	65.92	64.62	65.33	65.92	65.53	65.77	63.51	80.31	82.29	84.9	87.67	84.66	95.99	99.38		71.93	72.08	67.07	67.22	67.37	67.52	64.76	69.31	67.96	67.06	66.57	66.27	68.55
36	P. oryzihabitans ATCC 43272	44.82	50.97	52.14	55.6	46.12	55.34	56.11	55.83	60.3	62.35	64.16	62.71	61.99	65.47	64.35	63.44	64.66	64.81	65.11	63.46	63.36	64.07	63.6	64.49	64.55	63.89	64.02	73.02	73.26	71.54	73.06	72.87	70.56	71.93	71.93		97.4	70.71	71.95	71.78	69.8	62.9	67.87	66.47	66.17	64.67	63.77	67.51
37	P. psychrotolerans LMG 21977	45.94	52.39	53.03	56.34	46.71	55.79	56.56	55.98	60.89	63.25	65.21	63.91	63.05	65.92	64.65	64.5	65.26	65.56	65.86	64.36	64.86	64.82	63.89	64.93	64.84	64.78	64.47	73.48	73.41	71.99	73.67	73.48	70.56	72.08	72.08	97.4		71.47	72.08	72.69	70.26	62.9	68.47	67.07	66.77	65.72	64.52	68.26
38	P. duriflava KCTC 22129	45.27	49.03	54.45	54.29	48.9	54.38	57.24	54.88	55.93	59.28	63.55	61.05	59.28	61.95	62.29	62.59	63.21	64.11	64.11	61.2	59.67	60.72	58.33	61.31	59.76	59.97	61.71	67.23	67.37	66.21	70.62	67.23	65.1	67.22	67.07	70.71	71.47		80.89	81.97	64.35	60.96	63.27	62.78	64.13	64.72	63.38	63.1
39	P. luteola JCM 3352	45.12	47.68	52.52	55.47	48.75	55.57	55.9	55.33	57.27	59.58	63.86	62.5	60.63	62.56	60.78	61.39	61.86	62.46	62.61	61.2	61.32	61.62	59.38	60.42	62.13	62.5	63.81	69.21	69.03	69.25	71.39	68.9	66.31	67.07	67.22	71.95	72.08	80.89		98.92	65.05	60.96	63.72	62.48	65.17	64.57	64.42	63.84
40	P. zeshuii KACC 15471	45.27	47.98	52.82	55.62	48.9	55.72	55.9	55.33	57.42	59.88	63.86	62.41	60.63	63.01	60.78	61.39	61.86	62.46	62.61	61.35	61.32	61.77	59.38	60.27	61.83	62.5	63.81	69.36	69.03	69.41	71.54	69.05	66.46	67.22	67.37	71.78	72.69	81.97	98.92		65.26	61.11	63.57	62.63	65.47	64.87	64.72	63.99
41	P. mangrovi TC-11	45.87	50.22	55.74	56.83	47.96	54.98	57.39	59.14	58.37	63.5	63.76	62.97	61.93	62.43	63.44	64.05	62.65	64.61	64.76	62.69	62.39	61.14	62.46	62.91	61.95	60.68	62.28	68.89	69.02	69.04	67.37	69.5	66.47	67.22	67.52	69.8	70.26	64.35	65.05	65.26		68.2	74.05	72.6	71.99	70.52	69.6	71.67
42	P. pohangensis DSM 17875	43.82	48.14	52.86	53.51	48.77	57.65	54.77	56.24	56.03	59.25	62.13	59.82	60.42	61.34	60.3	58.65	57.72	60.57	60.42	59.22	59.07	60.36	60.06	60.06	59.41	58.88	58.21	64.8	64.77	62.18	64.75	63.9	63.8	64.61	64.76	62.9	62.9	60.96	60.96	61.11	68.2		67.63	69	70.36	69.3	67.93	69.14
43	P. azotifigens DSM 17556	45.18	50.3	54.31	56.85	45.44	55.08	53.69	59.21	58.25	62.63	65.28	64.38	61.79	65.23	64.72	64.42	65.18	66.37	66.52	64.73	65.18	62.02	62.59	64.06	63.54	62.3	61.52	68.72	68.11	69.32	69.77	69.92	68.11	69.16	69.31	67.87	68.47	63.27	63.72	63.57	74.05	67.63		83.13	74.77	74.74	73.52	77.76
44	P. urumqiensis T3	44.61	47.49	52.11	56.4	46.46	54.28	54.36	57.14	57.6	60.8	63.95	63.24	61.81	62.72	63.34	63.04	62.7	64.78	64.93	63.6	64.04	60.12	60.85	62.46	62.68	61	59.32	68.56	66.32	67.81	68.41	69.16	67.51	68.11	67.96	66.47	67.07	62.78	62.48	62.63	72.6	69	83.13		76.03	75.84	75.53	77.51
45	P. saudiphocaensis 20 BN	43.59	48.52	54.73	55.09	48.05	57.52	56.73	59.18	60.09	61.7	65.13	63.84	65.23	62.87	64.83	62.89	63.89	66.12	66.57	64.93	64.49	61.89	60.7	61.73	62.54	62.9	61.24	67.22	67.66	65.72	68.26	67.81	66.02	66.92	67.06	66.17	66.77	64.13	65.17	65.47	71.99	70.36	74.77	76.03		82.37	80.85	77.05
46	P. xanthomarina CCUG 46543	43.73	47.34	51.74	55.44	50.36	56.64	57.26	57.43	59.06	59.46	64.99	63.45	62.56	61.69	64.68	64.68	64.64	67.31	67.61	62.26	63.74	61.3	60.41	62.46	60.35	59.97	59.02	68.26	67.01	67.17	68.52	67.92	65.37	66.12	66.57	64.67	65.72	64.72	64.57	64.87	70.52	69.3	74.74	75.84	82.37		85.34	78.21
47	P. zhaodongensis DSM 27559	43.59	47.63	51.89	54.57	49.35	57.67	57.7	58.02	58.19	60.06	64.84	62.85	62.85	62.87	64.23	63.64	63.89	64.04	64.49	63.6	62.56	59.97	60.12	61.73	61.66	59.53	59.02	66.17	65.68	66.42	67.92	68.82	66.57	66.42	66.27	63.77	64.52	63.38	64.42	64.72	69.6	67.93	73.52	75.53	80.85	85.34		78.52
48	P. balearica DSM 6083	45.28	47.86	51.38	56.54	46.11	56.68	57.51	59.48	60.12	62.3	64.24	64.34	64.84	64.84	65.13	63.65	64.94	65.38	65.68	63.95	65.43	62.63	62.61	63.64	64.29	62.9	63.31	69.75	69.42	67.81	69.9	70.64	67.66	68.4	68.55	67.51	68.26	63.1	63.84	63.99	71.67	69.14	77.76	77.51	77.05	78.21	78.52
49	P. perfectomarina ATCC 14405	43	47.78	53.5	56.25	47.47	57.16	56.59	56.85	58.63	60.8	64.24	63.39	62.7	65.09	65.13	64.53	65.97	66.72	67.46	64.49	65.08	62.48	61.58	62.76	63.12	61.73	61.24	66.47	66.47	66.32	67.66	67.81	66.17	66.77	67.21	66.62	67.37	64.28	64.42	64.87	72.75	68.84	77.05	76.03	79.08	79.88	79.42	79.79
50	P. songnenensis NEAU-ST5-5	44.31	49.26	53.94	57.27	48.91	56.28	56.37	58.02	59.8	60.8	65.13	64.43	64.64	64.64	65.28	65.13	65.23	65.53	66.27	65.82	64.78	64.11	63.49	63.93	65.74	63.64	62.57	68.56	68.4	68.11	68.86	68.71	67.21	67.81	68.26	68.86	69.46	64.87	65.77	65.77	73.52	70.06	78.57	78.02	80.31	79.88	79.73	80.7
51	P. stutzeri ATCC 17588	44.31	48.52	52.48	56.54	49.2	55.69	56.81	57.58	58.63	60.51	65.43	64.58	64.49	64.79	66.77	66.02	65.53	66.57	66.72	64.78	64.04	63.81	62.17	63.78	63.85	64.81	62.43	68.41	66.91	67.81	69.01	68.41	67.36	67.66	67.81	67.66	68.56	64.72	65.32	65.62	71.84	68.09	77.96	77.56	79.39	80.49	78.66	79.94
52	P. chloritidismutans AW-1	43.44	46.45	53.35	55.96	48.63	56.43	55.7	58.31	59.06	60.51	64.09	64.14	64.64	65.53	65.72	64.53	65.23	65.97	66.12	65.53	64.78	63.66	63.49	63.34	63.85	64.08	62.87	68.26	66.47	66.92	68.56	66.62	66.92	67.66	67.66	66.92	67.81	64.13	65.17	65.47	71.69	69.6	77.66	77.1	79.24	79.73	80.03	80.7
53	P. kunmingensis DSM 25974	43.29	48.22	52.77	55.96	48.05	55.69	55.7	58.45	58.63	59.61	64.24	63.99	64.04	64.79	66.17	64.38	64.64	66.72	66.57	64.78	65.23	64.25	62.9	63.64	63.99	63.64	62.72	69.16	66.17	66.47	67.96	66.77	66.17	67.21	67.21	67.22	68.26	64.57	64.42	64.72	72.15	69.3	77.96	78.17	78.93	80.79	79.12	80.85
54	P. indica LMG 23066	45.53	50.3	54.76	56.16	47.09	55.82	58.27	59.09	60.85	64.86	65.42	62.82	63.47	64.03	63.93	62.15	62.17	62.76	62.61	66.12	64.68	64.33	63.41	64.74	65.1	65.93	63.08	72.29	71.19	71.6	71.45	71.08	69.62	69.47	69.77	68.77	69.37	67.02	68.63	68.67	73.4	65.11	72.67	71.77	71.17	72.41	69.57	72.97
55	P. flexibilis ATCC 29606	46.91	49.11	55.44	55.65	47.08	57.33	56.54	58.74	61.95	61.92	59.82	59.7	59.91	59.49	60.87	61.02	62.39	63.28	63.43	59.88	59.79	57.97	59.02	59.76	61.76	60.5	59.85	71.82	72.07	72.08	71.02	72.27	71.1	71.71	71.71	66.47	67.37	62.58	65.1	65.15	69.6	62.71	68.32	67.87	66.22	67.17	65.82	67.86
56	P. tuomuerensis CECT 7766	46.76	48.66	55.88	55.95	47.08	57.93	56.54	58.3	61.65	62.22	59.37	59.7	59.76	59.34	60.57	60.87	61.64	62.54	62.69	59.58	59.64	57.53	58.88	59.32	61.03	59.91	59.25	70.91	71.77	71.62	71.32	71.67	70.35	71.1	71.1	65.86	66.77	62.73	65.71	65.76	69.91	62.11	67.72	66.67	65.92	66.72	66.27	67.41
57	P. fluvialis ASS-1	45.66	50.74	55.88	56.53	47.52	56.3	56.54	58.44	60.03	62.31	61.77	62.29	60.69	60.39	62.07	61.02	61.64	62.09	62.54	60.96	62.52	60.9	60.44	61.19	62.74	61.19	58.74	72.58	72.14	71.28	72.04	73.79	72.99	73.52	74.13	65.71	66.77	60.76	64.64	64.39	68.85	63.25	68.57	68.72	66.02	67.12	67.12	68.86
58	P. pharmacofabricae ZYSR67-Z	45.8	50.6	55.74	56.09	47.08	57.19	57.13	58.88	60.03	62.61	61.92	62.44	61.6	60.54	61.92	60.87	61.94	62.39	62.84	61.56	62.82	61.19	60.89	61.63	62.89	61.48	59.19	72.88	72.14	71.73	72.34	74.09	73.44	73.98	74.58	66.01	66.92	61.06	64.64	64.39	68.55	64.16	68.57	69.02	65.71	67.27	67.42	69.16
59	Azotobacter beijerinckii ICMP 8673	46.37	48.02	55.18	56.43	46.16	54.41	55.22	58.39	58.69	64.73	62.31	60.36	60.24	62.17	61.3	61.3	60.88	61.91	61.76	61.54	64.11	63.91	62.85	64.46	64.96	65.49	62.81	67.91	67.75	67.66	69.61	69.25	69.3	69.9	70.04	67.41	68.15	63.98	65.92	66.22	68.96	62.93	68.75	67.86	68.45	67.41	68.15	71.58
60	Azotobacter chroococcum ATCC 9043	47.17	47.8	55.69	57.08	48.7	54.19	55.14	59.04	60.64	64.88	63.35	60.95	61.87	63.06	63.96	63.37	62.35	63.53	63.82	63.76	64.55	63.61	63.58	64.61	63.5	64.46	62.96	69.45	68.69	68.31	68.91	69.45	68.45	69.35	69.64	66.72	67.31	63.28	64.63	64.78	70.19	64.63	70.28	68.2	69.99	69.99	68.95	71.62
61	P. alcaligenes ATCC 14909	46.81	53.13	55.74	55.51	46.65	56.68	57.07	58.74	60.47	64.02	63.42	62.56	62.91	64.87	62.97	63.27	63.43	64.33	64.48	64.22	64.42	62.3	61.98	64.05	64.26	64.2	62.54	73.18	73.12	72.38	74.05	72.12	73.37	73.83	73.98	70.24	71.15	66.21	65.71	66.06	73.25	65.01	71.32	70.72	68.77	69.57	68.37	69.51
62	P. otitidis DSM 17224	47.35	50.82	56.09	56.16	48.33	55.49	57.37	59.09	59.38	63.06	63.17	63.4	62.97	63.98	61.83	63.02	62.84	64.18	64.18	64.17	63.77	64.18	62.67	63.56	63.33	65.33	62.63	76.1	74.66	72.69	75.87	73.98	75.23	75.53	75.83	69.23	69.98	68.23	67.73	67.93	73.02	67.52	72.63	72.4	70.59	71.99	71.08	73.57
63	RW2P1	46.85	50.3	55.56	55.47	48.41	55.1	56.96	58.39	58.68	62.63	62.44	62.97	62.54	63.1	61.55	62.59	62.56	63.6	63.6	63.13	63.04	63.45	62.09	62.83	62.9	64.9	61.76	75.15	74.33	71.75	74.92	73.04	74.59	74.89	75.19	68.62	69.37	67.32	66.82	67.02	72.08	66.92	71.71	71.77	69.82	71.06	70.61	72.94
64	RW2P3	47	50.44	55.7	55.62	48.26	55.24	56.96	58.54	58.82	62.78	62.59	63.12	62.69	63.24	61.7	62.74	62.56	63.6	63.6	63.28	63.19	63.6	62.24	62.98	63.05	65.04	61.9	75.3	74.18	71.9	75.08	73.19	74.74	75.04	75.34	68.77	69.52	67.47	66.97	67.17	72.23	67.07	71.86	71.92	69.97	71.21	70.76	73.09
65	P. furukawaii KF707	47.95	49.56	56.43	56.79	47.68	55.75	56.79	57.96	59.32	62.48	61.7	62.18	62.09	64.88	63.49	62.74	61.57	63.06	63.06	62.5	62.41	63.74	62.24	62.98	63.64	65.63	63.99	74.7	73.88	71.45	75.08	72.89	72.48	73.08	73.38	67.42	68.17	65.51	69.08	69.28	69.74	66.22	69.91	68.26	70.06	68.16	68.91	70.94
66	P. resinovorans LMG 2274	47.65	50.37	57.39	57.46	49.49	56.19	58.06	58.63	59.62	63.02	63.58	61.98	64.42	63.93	63.28	62.99	62.11	63.15	63.3	64.08	63.1	63.24	60.86	62.33	64.32	63.96	62.15	73.91	75.34	72.47	74.58	73.15	72.74	73.19	73.49	67.97	68.87	65.16	67.67	67.72	71.52	67.12	70.16	70.61	70.76	69.61	69.91	71.34
67	P. thermotolerans CIP 107795	46.33	50.15	58.39	56.14	46.38	53.45	57.07	59.36	60.38	62.43	63.88	62.33	61.79	61.61	62.85	61.96	62.13	64.64	64.35	62.8	63	63.69	62.33	63.81	64.02	62.63	63.34	72.52	70.83	70.48	71.84	71.32	70.61	70.91	70.76	68.71	69.16	64.56	66.32	66.07	72.7	65.87	71.86	70.06	69.46	69.06	68.01	72.6
68	P. guangdongensis CCTCC 2012022	45.81	50.07	57.92	58.57	47.38	55.1	57.94	60.29	62.15	63.91	61.73	61.49	60.33	64.28	63.91	63.16	61.98	62.72	63.17	63.13	63.34	63.58	63.26	64.74	62.74	64.74	63.98	70.24	72.31	69.79	71	71.6	71.73	71.28	71.58	69.15	68.84	64.65	65.56	65.86	72.73	64.01	69.92	67.52	68.87	67.52	67.07	71.26
69	P. oryzae KCTC 32247	45.67	49.7	56.3	55.93	47.67	55.11	58.02	58.82	61.27	62.91	62.84	62.63	62.57	63.38	62.91	62.46	65.82	65.97	66.12	63.68	63.28	65.13	63.76	64.79	64.41	65.68	62.84	71.79	74.44	71.26	73.83	72.7	73.8	73.34	73.64	72.21	72.36	65.76	64.56	64.4	70	64.05	71.32	69.17	67.97	69.17	68.27	71.71
70	P. linyingensis LMG 25967	46.68	49.26	56.53	57.18	49.05	53.99	57.13	57.73	59.29	62.2	62.43	60.84	62.82	62.72	63.55	64.46	63.42	64.17	64.32	62.63	60.45	61.43	60.68	62.02	62.54	62.76	61.83	70.8	72.41	69.59	70.65	71.41	71.23	70.78	70.93	68.23	68.53	64.3	63.39	63.39	70.41	64.56	71.84	69.43	68.52	69.28	69.13	71.81
71	P. sagittaria JCM 18195	46.23	48.96	56.39	57.18	49.05	53.55	58.17	57.44	59.29	61.3	62.28	61.88	61.47	63.32	63.1	63.86	62.82	64.02	64.17	62.33	61.19	61.88	61.28	62.46	62.54	62.31	61.23	70.8	72.71	70.5	71.1	71.71	71.08	70.93	71.08	68.53	68.99	63.99	64.6	64.45	70.41	65.46	71.54	69.43	68.98	69.58	69.13	71.96
72	P. kuykendallii NRRL B-59562	47.41	50.45	54.63	59.35	47.81	52.76	56.36	55.96	58.43	64.65	63.02	63.66	63.21	64.03	64.76	64.01	65.77	66.22	66.22	64.26	63.42	61.08	61.22	60.77	62.35	60.95	59.55	70.85	70.06	70.09	71	70.69	71.88	72.18	72.18	68.43	69.23	64.71	64.1	64.4	71.23	67.07	72.01	72.78	69.32	69.17	69.77	69.76
73	P. sediminis PI11	46.29	53.09	58.28	55.85	49.12	59.58	60.08	58.49	63.35	64.19	66.26	65.91	65.15	63.55	64.05	64.95	66.27	66.11	66.42	66.21	66.11	64.1	63.62	63.47	64.3	64.98	63.46	73.74	74.74	72.87	74.7	75.42	71.88	72.49	72.95	70.41	71.02	66.16	67.02	67.07	73.81	65.4	69.38	67.92	71.23	69.02	67.07	70.01
74	P. indoloxydans JCM 14246	45.85	51.89	57.4	57.48	48.68	57.93	58.72	56.72	60.39	63.43	65.51	63.62	63.79	64.76	63.44	64.95	65.81	65.51	65.66	65.45	64.75	61.84	62.57	63.62	63.41	63.04	62.11	73.13	74.74	71.65	73.63	73.59	71.28	71.58	71.73	70.07	70.26	67.68	68.24	67.98	74.12	66.01	69.53	67.32	71.39	68.72	68.42	68.52
75	P. oleovorans subsp. oleovorans ATCC 8062	46.88	52.04	57.54	57.78	49.12	58.83	59.62	57.16	60.68	63.58	66.11	64.38	64.39	64.91	63.75	65.26	66.11	65.81	65.96	65.61	64.6	61.99	62.87	63.92	63.7	63.34	62.56	73.28	75.34	71.8	73.78	73.89	71.58	71.88	72.04	70.56	70.86	68.13	69	68.74	74.27	66.62	69.98	67.62	71.69	68.72	68.57	68.52
76	P. pseudoalcaligenes subsp. pseudoalcaligenes LMG 1225	47.03	51.89	57.4	57.63	49.26	58.98	59.47	57.02	60.53	63.43	65.96	64.23	64.24	64.76	63.6	65.11	65.96	65.66	65.81	65.45	64.45	61.84	62.72	63.77	63.56	63.19	62.41	73.13	75.19	71.65	73.63	73.74	71.43	71.73	71.88	70.41	70.71	67.98	68.84	68.59	74.12	66.62	69.98	67.47	71.54	68.57	68.42	68.37
77	P. composti CCUG 59231	46.29	51.28	57.33	56.3	49.04	56.89	58.27	57.16	59.94	62.82	66.26	64.69	65.61	64.46	65.26	66.16	65.81	67.17	67.47	65.91	64.75	63.95	64.22	63.32	64	63.49	62.26	73.28	75.04	73.63	75.3	74.35	72.04	72.64	73.1	71.17	71.78	67.68	67.63	67.68	75.19	66.01	70.14	67.92	71.39	68.72	67.82	69.12
78	P. guguanensis JCM 18416	47.18	53.24	58.28	57.04	48.97	58.53	59.92	58.35	62.76	64.95	67.62	65.14	66.82	65.21	65.86	66.77	67.92	68.07	68.22	67.73	65.81	64.1	64.52	64.97	65.19	65.57	63.31	75.42	77.16	75.3	76.07	76.18	74.01	74.01	74.16	72.99	73.6	68.44	68.54	68.59	75.5	67.22	71.95	70.03	72.44	70.68	69.62	71.36
79	P. mendocina NCTC 10897	47.48	53.24	57.69	57.04	48.97	58.08	59.85	58.05	63.06	64.49	66.72	64.08	66.21	64.91	65.71	66.92	67.62	67.62	67.77	67.12	65.81	63.5	64.52	64.97	65.04	65.42	64.06	75.42	77	75.15	76.07	76.03	73.71	74.01	74.16	73.14	73.75	68.13	68.24	68.29	75.65	66.92	71.79	69.88	72.29	69.92	68.87	70.76
80	P. alcaliphila JCM 10630	47.03	52.19	57.25	56.74	49.12	57.34	59.02	58.35	62.17	65.4	66.11	64.23	66.36	64.31	65.11	66.47	66.87	67.02	67.02	66.82	65.2	63.05	64.22	64.52	65.33	64.98	63.46	74.5	75.79	73.63	75.76	76.49	72.49	73.1	73.25	72.08	72.69	67.68	68.09	68.13	76.42	67.22	71.19	68.98	71.39	69.32	68.57	70.31
81	P. sihuisensis KCTC 32246	47.18	52.49	56.95	56.74	48.82	57.63	59.02	58.35	62.17	64.8	67.02	64.38	65.61	64.61	65.41	66.47	66.72	67.32	67.32	67.27	65.81	63.65	63.92	64.52	65.19	64.53	63.76	74.81	76.1	73.78	75.61	75.73	72.8	73.4	73.56	72.08	72.69	67.83	68.54	68.59	76.26	66.92	71.49	69.58	72.14	69.62	69.02	70.31
82	P. chengduensis DSM 26382	47.03	52.49	57.1	56.74	48.97	57.93	59.17	57.75	61.87	64.64	66.72	64.69	65.91	64.76	64.35	66.31	66.57	66.87	66.87	66.82	65.2	63.2	63.77	64.52	64.89	63.79	63.46	74.05	75.64	73.48	75.3	75.42	72.19	72.8	72.95	71.78	72.38	67.53	67.93	67.98	76.11	66.16	71.19	69.28	71.54	69.17	68.87	70.16
83	P. toyotomiensis JCM 15604	47.18	52.79	57.25	57.33	49.12	57.49	59.02	58.35	62.17	64.64	66.72	64.54	65.61	64.61	65.11	66.77	67.47	67.47	67.47	66.97	65.51	63.5	64.07	64.97	65.19	64.38	63.46	74.66	76.1	73.78	75.76	75.57	72.95	73.56	73.71	72.08	72.69	67.53	67.93	67.98	76.42	66.46	71.49	69.73	71.84	69.62	69.02	70.31
84	P. taeanensis KCTC 22612	46.59	51.06	56.89	57.72	48.53	57.36	57.61	57.9	59.2	62.37	63.24	62.4	64.09	62.5	62.24	62.69	62.8	62.05	62.35	64.85	62.78	62.9	61.98	63.17	63.26	61.7	59.7	70.53	69.85	69.77	70.38	71.1	70.02	69.41	69.56	67.22	67.53	63.13	64.29	64.34	70.29	64.19	66.77	67.57	68.63	66.92	67.52	66.52
85	P. benzenivorans DSM 8628	47.48	52.04	57.84	57.19	48.09	56.74	56.92	60.12	59.79	66.01	64.75	64.69	65	67.17	66.47	65.11	64.76	66.27	65.96	67.42	65.96	65.01	65.12	65.72	65.19	64.08	63.16	74.96	71.86	74.7	74.54	74.2	74.01	74.47	74.62	70.26	70.86	63.28	66.41	66.16	73.97	66.77	72.25	71.23	70.78	70.08	68.12	68.67
86	P. borbori LMG 23199	45.55	52.19	59.02	57.04	49.41	55.39	57.37	59.23	58.61	64.04	63.99	64.08	63.18	63.7	65.11	64.05	64.31	65.06	65.36	65.61	63.39	63.35	61.98	63.77	65.04	62.59	60.75	72.52	70.8	70.12	71.8	71.45	70.21	70.97	71.43	67.07	67.68	63.73	66.11	65.86	72.74	64.49	69.98	69.28	70.48	68.42	67.67	66.72
87	P. cuatrocienegasensis CIP 109853	45.4	51.89	57.84	57.63	49.71	58.98	57.37	58.49	59.64	62.67	66.87	64.38	63.79	64.31	61.03	61.18	62.2	62.35	62.8	65.61	64.45	62.29	61.23	62.28	62.37	61.85	58.95	72.37	72.01	69.82	72.1	71.76	70.97	70.36	70.36	67.83	68.13	64.8	65.96	66.01	70.75	64.64	68.48	67.62	70.63	67.67	66.62	67.32
88	P. guineae M8	42.39	49.62	58.11	56.64	49.93	58.27	58.23	57.5	56.87	59.97	59.49	62.88	62.14	61.02	59.85	59.25	59.37	59.37	59.82	60.78	60.54	59.31	57.82	59.02	58.7	57.72	57.04	65.2	64.46	64.64	64.8	66.11	64.45	64.3	64.6	62.24	62.54	59.21	61.72	61.78	67.53	63.9	63.21	63.72	67.32	63.47	63.62	61.49
89	P. anguilliseptica LMG 21629	43.03	48.87	56.51	56.74	49.85	56.59	58.27	57.75	56.38	61.31	61.88	62.25	61.82	61.45	61.18	59.82	60.09	60.24	60.24	63.94	62.03	61.24	60.03	61.23	61.63	61.55	59.1	69.01	67.62	68.29	66.77	69.31	67.78	68.39	68.39	63.58	64.19	61.31	63.53	63.58	71.06	63.58	65.46	65.21	68.22	64.96	65.71	64.62
90	P. peli LMG 23201	43.62	51.13	57.69	56.89	50.15	58.08	59.02	59.08	57.42	60.55	62.33	62.86	63.03	62.35	61.63	59.82	59.94	60.09	60.39	66.06	63.24	63.35	61.68	62.13	62.22	61.7	59.25	70.08	67.47	67.53	68.14	69.01	67.78	67.78	67.78	64.64	65.55	60.85	63.98	64.04	70.29	63.58	65.91	65.06	68.22	64.06	65.11	63.87
91	P. marincola JCM 14761	45.56	50	56.57	55.26	50.95	55.69	57.37	53.83	57.12	62.33	64.76	63.18	63.95	64.11	59.19	60.24	60.51	60.66	60.81	64.56	61.3	60.9	60	61.49	59.38	59.58	59.07	67.33	65.06	65.25	66.62	67.02	64.75	65.36	65.2	61.63	62.39	64.69	63.47	63.37	68.24	65.2	63.81	65.77	66.97	67.77	66.87	63.98
92	P. segetis IMSNU 1410	46.14	52.72	56.15	57.86	50	55.84	58.42	55.24	58.75	63.73	64.9	63.62	62.73	64.46	60.88	60.57	62.05	62.35	62.65	65	63.54	61.54	61.53	61.98	61.33	60.36	58.2	70.08	68.84	66.77	68.75	70.99	67.48	67.78	67.33	64.19	65.1	63.87	63.97	64.02	69.53	65.4	66.82	66.87	68.22	67.52	68.12	67.02
93	P. seleniipraecipitans LMG 25475	43.18	51.43	57.4	59.41	49.26	56.74	60.38	58.2	60.98	65.25	65.51	64.84	64.39	65.06	63.9	63.9	63.25	63.86	64.01	65.45	64.15	61.39	61.68	63.47	61.48	61.7	61.05	70.38	70.2	68.6	70.73	70.53	68.54	69.45	69.6	65.55	65.71	66.31	65.95	65.85	73.35	65.86	69.08	67.92	70.48	67.52	67.07	67.32
94	P. flavescens LMG 18387	45.25	51.51	58.22	57.57	47.06	56.89	57.22	57.75	60.09	64.49	64.15	62.71	63.94	65.66	63.75	64.65	62.5	63.86	64.16	64.85	64.15	62.9	62.28	63.17	63.26	62.15	62.26	72.82	72.01	70.12	73.48	72.06	70.67	71.73	71.88	68.74	69.35	67.38	68.55	68.75	74.43	67.22	69.38	67.47	72.44	68.42	68.87	68.37
95	P. argentinensis LMG 22563	44.66	50.38	58.58	59.41	48.24	57.34	59.02	59.23	61.28	65.4	65.36	63.17	64.24	64.91	63.9	64.2	62.65	63.1	63.4	65.3	65.05	62.29	63.32	63.62	61.93	61.55	60.45	72.21	72.47	70.27	73.48	72.52	70.06	71.28	71.43	68.89	69.2	66.46	65.5	65.4	74.73	66.62	70.29	69.58	73.49	69.77	69.77	69.27
96	P. punonensis CECT 8089	43.92	50.68	57.69	58.67	48.97	57.63	59.17	57.9	59.5	64.19	65.51	63.77	64.09	64.46	63.75	62.99	62.5	61.75	62.05	65.91	64.75	61.84	62.13	63.47	63.41	62.44	62.41	71.45	71.71	69.82	72.26	72.21	69.6	70.52	70.67	67.53	67.83	66.46	65.5	65.4	73.97	66.31	68.33	68.07	72.29	68.72	70.38	68.52
97	P. straminea LMG 21615	43.47	50.38	58.58	58.07	49.41	56.74	58.57	58.49	60.39	63.73	65.36	65.75	64.24	64.61	64.35	64.05	62.35	63.25	63.55	65.61	65.05	63.5	63.02	64.82	64.59	62.89	62.26	72.67	73.37	70.73	73.32	73.28	70.67	71.58	71.73	69.65	69.8	66.01	66.11	66.16	75.04	67.37	69.53	69.73	74.55	70.23	69.92	69.12
98	P. turukhanskensis IB1.1	46.63	51.95	53	57.77	49.27	55.56	58.26	56.95	57.79	63.16	64.13	62.91	61.23	61.61	62.76	63.96	63.02	63.32	63.92	61.38	61.38	61.85	60.21	61.54	59.88	60.38	61.52	68.67	68.06	69.32	68.87	67.47	66.27	67.32	67.77	66.47	67.67	64.91	66.06	66.27	71.56	64.05	69.07	69.23	68.17	69.98	68.17	68.02
99	P. massiliensis CB1	46.39	49.78	55.01	57.16	48.39	55.59	56.96	58.91	59.06	65.17	62.54	61.56	59.88	61.19	62.33	62.18	61.58	62.78	62.93	61.41	61.83	63.13	63.11	64.3	62.76	60.18	60.86	66.97	68.86	67.72	67.87	69.08	68.22	67.82	68.12	69.23	68.92	65.41	65.56	65.41	70.87	62.52	69.44	67.41	66.37	66.96	65.33	66.81
100	P. rhizosphaerae LMG 21640	46.02	49.03	54.14	56.44	46.54	56.2	56.75	57.08	58.85	62.11	60.69	63.14	60.27	60.69	60.09	60.09	61.14	61.43	61.88	61.05	62.43	59.94	61.42	61.28	61.09	61.3	60.21	67.37	67.22	66.52	67.42	68.88	68.58	67.97	68.57	65.56	65.41	62.54	63.54	63.6	69.34	59.34	66.72	67.96	66.02	64.53	63.34	67.21
101	P. coleopterorum CECT 8695	46.76	50.22	54.14	56.89	47.57	55.75	56.45	58.11	59.14	62.41	62.18	64.2	61.32	61.14	62.18	61.88	62.33	63.23	63.68	62.56	62.87	62.33	62.17	63.2	62.56	61.3	60.95	68.88	68.27	68.02	68.48	69.34	69.34	69.02	69.62	66.92	66.47	63.9	65.36	65.11	69.34	59.49	67.91	68.11	66.47	65.57	64.08	66.92
102	P. japonica JCM 21532	48.6	49.4	55.98	55.62	46.48	57.14	57.99	58.68	60.62	62.26	60.84	61.03	60.12	60.09	62.72	63.62	61.53	63.02	62.87	62.26	62.22	62.78	62.91	63.06	65.35	63.96	62.59	71.75	69.32	68.02	68.78	67.98	69.79	69.62	69.32	67.37	68.27	65.05	66.97	66.57	68.13	60.03	65.77	65.52	64.78	66.47	64.23	65.08
103	P. qingdaonensis JJ3	46.83	48.07	55.98	56.51	46.19	55.13	58.43	58.53	61.06	64.21	60.24	61.93	60.87	61.29	61.38	62.28	61.98	62.43	62.57	62.11	59.82	63.08	62.76	63.35	63.44	61.3	62	68.58	68.07	67.72	67.27	68.88	67.47	67.37	67.37	66.92	67.67	65.51	66.97	66.87	70.69	61.73	66.52	66.42	65.67	66.32	66.47	66.12
104	P. alkylphenolica JCM 16553	46.17	48.07	54.36	55.62	49.05	56.1	56.28	56.7	59.68	61.35	56.5	58.91	55.32	57.7	58.98	59.58	59.13	59.88	60.33	58.35	56.52	58.3	58.9	58.46	60.5	57.9	58.72	61.42	62.61	63.75	62.08	64.9	63.65	63.7	63.86	62.78	62.35	61.72	63.79	63.69	65.66	60.33	63.79	63.08	63.08	62.69	63.58	62.35
105	P. wadenswillerensis CCOS 864	47.64	47.92	54.06	55.47	47.14	57.89	55.9	57.58	59.53	61.35	58.74	59.21	58.32	58.89	58.68	60.33	61.23	61.53	61.98	58.65	58.17	60.54	59.79	60.24	63	60.86	61.25	65.05	65.17	66.01	65.56	67.32	66.52	66.27	66.27	63.69	63.25	62.61	63.58	63.48	67.32	62.57	64.68	65.47	63.83	64.63	64.03	63.84
106	P. donghuensis HYS	47.64	48.21	54.95	56.21	48.75	56.4	57.32	57	59.53	62.26	58	58.76	58.77	57.85	59.13	61.08	61.68	61.98	62.43	58.95	58.02	59.94	59.5	60.83	63.29	62.33	60.66	65.51	65.77	65.86	66.01	67.62	67.42	66.87	66.57	64.45	64.01	61.85	62.97	62.73	66.87	61.68	64.83	65.62	64.13	66.27	64.93	63.39
107	P. vranovensis DSM 16006	46.46	48.21	54.51	57.54	48.46	56.55	56.13	57.29	58.35	60.3	58.15	59.52	56.97	57.4	58.38	59.13	61.53	60.18	60.63	58.5	58.17	60.39	59.05	60.09	61.67	62.04	60.06	64.9	64.41	65.86	64.05	66.26	65.91	65.21	64.91	63.69	63.25	60.67	62.58	62.33	65.81	60.18	64.98	63.83	63.83	65.67	64.63	62.8
108	SWRI97	45.8	48.07	52.44	57.84	50.15	55.57	55.75	55.88	59	61.2	58.74	59.21	56.97	58.45	58.68	60.03	60.63	60.18	60.03	60.6	58.92	60.69	61.72	60.68	59.62	58.94	60.21	63.14	62.82	63.8	61.69	64.8	63.55	63.61	63.61	63.29	62.86	59.88	62.86	62.61	65.71	60.84	62.65	62.99	61.94	62.59	61.4	62.41
109	SWRI98	45.8	48.07	52.44	57.84	50.15	55.57	55.75	55.88	59	61.2	58.74	59.21	56.97	58.45	58.68	60.03	60.63	60.18	60.03	60.6	58.92	60.69	61.72	60.68	59.62	58.94	60.21	63.14	62.82	63.8	61.69	64.8	63.55	63.61	63.61	63.29	62.86	59.88	62.86	62.61	65.71	60.84	62.65	62.99	61.94	62.59	61.4	62.41
110	SWRI107*	45.8	48.07	52.44	57.84	50.15	55.57	55.75	55.88	59	61.2	58.74	59.21	56.97	58.45	58.68	60.03	60.63	60.18	60.03	60.6	58.92	60.69	61.72	60.68	59.62	58.94	60.21	63.14	62.82	63.8	61.69	64.8	63.55	63.61	63.61	63.29	62.86	59.88	62.86	62.61	65.71	60.84	62.65	62.99	61.94	62.59	61.4	62.41
111	SWRI51*	45.8	48.07	52.44	57.84	50.15	55.57	55.75	55.88	59	61.2	58.74	59.21	56.97	58.45	58.68	60.03	60.63	60.18	60.03	60.6	58.92	60.69	61.72	60.68	59.62	58.94	60.21	63.14	62.82	63.8	61.69	64.8	63.55	63.61	63.61	63.29	62.86	59.88	62.86	62.61	65.71	60.84	62.65	62.99	61.94	62.59	61.4	62.41
112	SWRI40	45.36	47.92	52.14	57.4	49.85	54.83	55.6	55.74	58.7	61.2	58.3	58.76	56.22	58	58.68	59.88	60.33	59.88	59.73	60.15	58.62	60.39	61.13	60.24	59.62	59.38	60.06	62.84	62.52	63.8	61.69	64.95	63.4	63.91	63.91	62.99	62.56	59.57	62.56	62.31	65.56	60.54	62.5	62.54	61.64	62	60.8	62.11
113	SWRI101	46.1	48.51	52.88	57.84	50	55.42	55.3	56.18	59.29	61.65	58.89	59.21	56.82	58.15	59.13	60.48	60.48	60.33	60.18	60.6	58.92	60.69	61.57	60.83	60.06	59.53	60.36	63.6	63.12	64.25	62.29	65.11	63.86	64.21	64.21	63.75	63.31	59.88	63.47	63.22	66.31	60.84	62.95	63.43	62.39	62.74	61.55	62.56
114	P. cremoricolorata DSM 17059	45.66	46.94	53.77	55.62	45.75	55.82	56.75	57.5	58.37	61.78	59.91	60.42	57.59	58.62	57.14	58.05	58.47	58.47	58.47	60.75	59.52	59.61	61.55	62.3	61.06	59.35	60.33	65.25	66.11	65.61	65	65.55	66.26	66.77	66.47	66.62	66.31	61.22	63.15	62.9	66.92	60.36	62.93	63.57	63.27	62.87	61.68	64.18
115	SWRI53	46.14	46.9	52.41	56.87	47.54	54.05	55.47	54.73	58.71	59.38	57.4	57.38	55.41	57.46	59.29	59.44	59.11	59.85	59.7	58.01	58.81	59.17	59.32	60.35	59.59	59.5	58.55	62.87	62.41	62.33	62.33	64.97	62.09	62.44	62.44	62.86	62.72	60.06	61.63	61.54	63.81	58.4	63.17	63.35	61.87	61.93	60.3	61.15
116	SWRI147	46.14	46.61	52.12	56.73	47.25	54.05	55.18	54.73	58.42	59.38	57.4	57.38	55.41	57.16	59.29	59.44	59.11	59.85	59.7	58.01	58.81	59.17	59.32	60.35	59.59	59.5	58.55	62.87	62.41	62.33	62.33	64.97	61.94	62.3	62.3	62.86	62.72	59.76	61.63	61.54	63.66	58.1	63.17	63.06	61.87	61.93	60	61.15
117	SWRI41	46.14	46.76	52.26	57.02	47.39	54.2	55.47	54.88	58.57	59.52	57.54	57.68	55.56	57.31	59.44	59.44	59.26	60	59.85	58.16	58.96	59.32	59.47	60.5	59.74	59.65	58.7	62.87	62.41	62.48	62.48	65.12	62.09	62.44	62.44	62.86	62.72	59.76	61.63	61.54	63.66	58.1	63.31	63.06	62.02	61.93	60.15	61.3
118	SWRI56*	46.14	46.9	52.26	56.73	47.39	53.9	55.33	54.88	58.86	59.23	57.54	57.23	55.56	57.31	59.44	59.58	58.96	60	59.85	57.86	58.67	59.02	59.03	60.06	59.59	59.21	58.26	63.02	62.26	62.18	62.18	65.12	62.24	62.59	62.59	62.71	62.57	60.21	61.48	61.39	63.66	58.54	63.02	63.5	62.02	62.07	60.15	61
119	P. reidholzensis CCOS 865	48.16	47.32	52.44	57.4	47.8	54.38	55.22	54.56	57.37	60.45	58.89	59.21	57.27	59.79	59.88	61.38	61.08	61.98	62.13	60.75	61.17	59.79	61.13	61.13	60.35	59.97	59.61	64.8	64.92	64.56	64.4	65.86	64.31	64.66	64.36	64.35	64.51	61.88	63.18	62.93	65.86	60.09	64.43	64.63	62.69	64.08	60.95	62.56
120	SWRI10*	47.28	47.62	52.44	57.69	48.83	53.49	55.52	55.59	58.41	59.85	58.3	58.31	57.42	59.19	60.18	61.68	61.08	61.83	61.98	58.5	59.52	59.04	59.94	60.24	60.35	59.08	59.17	64.2	64.77	63.95	64.25	65.86	63.86	64.51	64.21	64.65	64.66	62.48	62.73	62.48	64.65	59.49	64.29	65.52	61.49	63.04	60.8	63.15
121	SWRI9	47.13	47.32	52.29	57.4	48.68	53.49	55.52	55.44	58.26	59.85	58	58.31	57.42	59.19	60.18	61.68	60.78	61.83	61.98	58.5	59.22	59.04	59.94	60.24	60.35	58.79	58.87	64.2	64.77	63.95	64.25	65.86	63.86	64.51	64.21	64.65	64.66	62.48	62.73	62.48	64.65	59.49	63.99	65.22	61.49	63.04	60.8	63.15
122	SWRI34	47.42	47.62	52.44	57.69	48.53	53.34	55.37	55.88	58.11	60.3	58.15	58.91	57.87	59.79	60.48	61.68	61.23	62.13	62.28	58.8	59.67	59.79	59.94	60.39	61.09	59.38	59.31	64.5	64.92	64.4	64.25	66.01	64.46	65.11	64.81	65.41	65.41	62.18	62.58	62.33	64.65	59.64	64.29	65.37	62.09	63.04	60.95	63.3
123	P. guariconensis LMG 23394	47.57	49.4	53.32	56.07	47.65	54.83	55.75	56.03	58.7	62.41	61.58	60.57	58.02	60.99	59.43	61.08	61.53	62.28	62.13	60.9	60.72	62.78	63.06	63.2	62.56	61.15	60.66	66.77	64.92	66.37	63.8	65.86	65.06	65.41	65.26	66.17	66.62	62.18	64.39	64.3	69.18	60.54	66.67	64.78	65.07	66.32	64.23	65.23
124	SWRI67*	46.97	46.13	53.18	57.69	49.41	54.68	55.45	54.71	57.52	60.45	58.45	57.55	56.52	57.1	57.93	58.98	58.23	59.58	59.73	58.5	57.12	58	59.35	59.35	59.91	58.64	57.68	61.78	63.12	62.44	62.59	64.65	63.1	63.61	63.61	62.08	61.8	60.82	61.97	61.88	64.35	59.19	62.65	64.03	63.13	62.44	61.25	62.41
125	SWRI100*	46.97	46.13	53.18	57.69	49.41	54.68	55.45	54.71	57.52	60.45	58.45	57.55	56.52	57.1	57.93	58.98	58.23	59.58	59.73	58.5	57.12	58	59.35	59.35	59.91	58.64	57.68	61.78	63.12	62.44	62.59	64.65	63.1	63.61	63.61	62.08	61.8	60.82	61.97	61.88	64.35	59.19	62.65	64.03	63.13	62.44	61.25	62.41
126	SWRI50*	46.97	46.13	53.18	57.69	49.41	54.68	55.45	54.71	57.52	60.45	58.45	57.55	56.52	57.1	57.93	58.98	58.23	59.58	59.73	58.5	57.12	58	59.35	59.35	59.91	58.64	57.68	61.78	63.12	62.44	62.59	64.65	63.1	63.61	63.61	62.08	61.8	60.82	61.97	61.88	64.35	59.19	62.65	64.03	63.13	62.44	61.25	62.41
127	SWRI68*	46.38	46.43	53.03	57.54	48.39	54.23	56.04	55.29	57.82	60.45	58.59	57.25	57.12	57.25	58.23	59.43	59.43	59.88	60.18	58.35	58.77	58.89	59.05	59.5	60.5	58.35	57.82	62.69	64.32	63.8	63.35	64.95	64.46	64.81	64.51	62.54	62.71	61.27	62.12	62.03	63.75	59.19	63.54	64.03	63.28	62.3	61.7	61.96
128	SWRI77*	46.38	46.43	53.03	57.54	48.39	54.23	56.04	55.29	57.82	60.45	58.59	57.25	57.12	57.25	58.23	59.43	59.43	59.88	60.18	58.35	58.77	58.89	59.05	59.5	60.5	58.35	57.82	62.69	64.32	63.8	63.35	64.95	64.46	64.81	64.51	62.54	62.71	61.27	62.12	62.03	63.75	59.19	63.54	64.03	63.28	62.3	61.7	61.96
129	SWRI59*	46.38	46.43	53.03	57.54	48.39	54.23	56.04	55.29	57.82	60.45	58.59	57.25	57.12	57.25	58.23	59.43	59.43	59.88	60.18	58.35	58.77	58.89	59.05	59.5	60.5	58.35	57.82	62.69	64.32	63.8	63.35	64.95	64.46	64.81	64.51	62.54	62.71	61.27	62.12	62.03	63.75	59.19	63.54	64.03	63.28	62.3	61.7	61.96
130	RW4S2*	47.72	49.11	55.1	58.28	48.97	56.25	57.09	56.62	58.55	59.85	60.24	60.27	57.72	59.19	58.38	59.58	60.18	60.18	60.18	59.1	59.22	60.09	59.5	59.94	60.06	59.97	58.42	63.6	65.72	65.91	65.31	66.01	65.71	65.86	65.56	64.95	64.96	61.12	62.88	62.63	66.92	60.3	66.37	66.42	63.13	63.93	61.4	63.74
131	RW4P2	47.42	48.81	55.24	58.14	48.83	56.1	57.09	56.47	58.55	59.7	60.09	59.97	57.87	59.04	58.53	59.73	60.33	60.33	60.33	59.1	59.37	60.24	59.5	59.94	60.35	59.97	58.57	63.6	65.87	65.91	65.16	65.86	65.71	65.86	65.56	64.65	64.66	61.12	62.88	62.63	66.92	60.3	66.37	66.42	63.28	64.08	61.55	63.74
132	RW10S1*	46.69	46.43	54.51	56.8	48.31	55.44	55.83	55.15	57.08	60.3	58.74	58.16	56.07	58.3	58.23	58.08	58.98	60.18	60.18	58.2	57.87	58.74	59.05	58.9	60.65	58.94	59.17	62.54	63.72	63.75	63.75	64.45	63.25	63.86	63.55	61.93	61.95	59.91	61.52	61.27	65.86	58.36	63.39	65.07	63.28	64.67	60.63	62.56
133	RW10P3b	46.69	46.43	54.51	56.8	48.31	55.44	55.83	55.15	57.08	60.3	58.74	58.16	56.07	58.3	58.23	58.08	58.98	60.18	60.18	58.2	57.87	58.74	59.05	58.9	60.65	58.94	59.17	62.54	63.72	63.75	63.75	64.45	63.25	63.86	63.55	61.93	61.95	59.91	61.52	61.27	65.86	58.36	63.39	65.07	63.28	64.67	60.63	62.56
134	RW9S2	46.69	46.73	54.36	57.1	48.16	55.74	55.83	55.44	57.23	60.45	58.74	58.46	56.37	58.59	58.68	58.53	59.43	60.63	60.63	58.2	58.02	58.74	59.35	59.2	60.79	58.94	59.02	62.39	64.02	64.2	63.9	64.9	63.4	64.16	63.86	62.24	62.26	60.21	61.82	61.57	66.01	58.51	63.84	65.37	63.58	64.82	60.78	62.7
135	RW7S1	46.54	46.88	54.36	56.8	48.02	55.44	55.68	55.59	57.67	60.6	58.89	58.61	56.07	58.74	58.83	58.68	59.58	60.78	60.78	58.5	58.17	59.04	59.5	59.35	61.09	59.38	59.17	62.84	64.17	64.35	64.2	64.75	63.7	64.31	64.01	62.39	62.41	60.36	61.97	61.72	65.86	58.21	63.84	65.37	63.73	64.97	60.78	62.56
136	RW3S1*	47.79	48.74	54.13	58.35	49.49	54.6	57.15	55.8	59.06	62.76	61.04	59.88	57.93	60.6	60.54	61.14	61.14	61.58	61.58	60.21	60.33	60.9	61.48	62.07	62.76	59.88	59.08	65.91	67.37	66.57	65.21	66.82	66.17	65.92	65.92	64.71	65.02	61.03	62.93	62.84	68.33	60.3	67.01	65.72	62.15	64.29	63.1	64.69
137	RW3S2*	47.79	48.74	54.13	58.35	49.49	54.6	57.15	55.8	59.06	62.76	61.04	59.88	57.93	60.6	60.54	61.14	61.14	61.58	61.58	60.21	60.33	60.9	61.48	62.07	62.76	59.88	59.08	65.91	67.37	66.57	65.21	66.82	66.17	65.92	65.92	64.71	65.02	61.03	62.93	62.84	68.33	60.3	67.01	65.72	62.15	64.29	63.1	64.69
138	RW10S2*	47.65	48.89	54.28	58.49	49.34	54.75	57	55.95	59.2	62.91	61.19	60.03	57.93	60.6	60.69	61.29	61.14	61.58	61.58	60.21	60.48	61.04	61.63	62.22	62.9	60.03	59.23	66.06	67.51	66.72	65.36	66.97	66.32	66.07	66.07	64.86	65.17	60.88	62.78	62.69	68.48	60.15	67.16	65.57	62	64.43	63.24	64.54
139	P. plecoglossicida CIP 106493	46.24	46.58	53.18	57.1	48.83	54.09	54.78	55.15	57.67	60.6	57.7	57.4	56.22	58.3	58.53	60.48	59.73	60.93	61.08	58.65	58.32	59.34	59.05	61.13	62.11	58.94	59.02	64.65	65.52	64.86	64.4	67.52	64.91	65.11	65.11	65.11	65.11	62.03	62.58	62.33	65.86	59.34	65.03	65.97	63.13	64.23	63.04	64.34
140	RW7P2*	47.72	47.62	54.51	59.47	50.15	55.57	55.75	55.88	58.55	61.8	58.59	59.67	56.97	59.04	58.68	60.48	60.33	60.78	60.93	59.55	59.67	61.14	60.68	61.87	61.97	60.12	60.06	64.65	65.37	64.25	64.1	66.92	64.31	64.66	64.66	66.01	66.47	62.78	64.24	63.99	66.77	60.54	64.88	65.37	63.28	65.28	62.89	64.49
141	P. taiwanensis DSM 21245	47.72	47.62	54.51	59.47	50.15	55.57	55.75	55.88	58.55	61.8	58.59	59.67	56.97	59.04	58.68	60.48	60.33	60.78	60.93	59.55	59.67	61.14	60.68	61.87	61.97	60.12	60.06	64.65	65.37	64.25	64.1	66.92	64.31	64.66	64.66	66.01	66.47	62.78	64.24	63.99	66.77	60.54	64.88	65.37	63.28	65.28	62.89	64.49
142	RW2S1*	47.72	47.62	54.51	59.47	50.15	55.57	55.75	55.88	58.55	61.8	58.59	59.67	56.97	59.04	58.68	60.48	60.33	60.78	60.93	59.55	59.67	61.14	60.68	61.87	61.97	60.12	60.06	64.65	65.37	64.25	64.1	66.92	64.31	64.66	64.66	66.01	66.47	62.78	64.24	63.99	66.77	60.54	64.88	65.37	63.28	65.28	62.89	64.49
143	P. entomophila L48	46.98	47.32	53.77	56.8	47.65	54.83	55.3	55.74	59.29	61.65	58.3	58.61	57.12	60.69	59.58	61.98	61.53	62.13	62.13	60.3	60.27	63.68	63.06	63.5	63.58	61	61.1	64.5	64.47	65.31	65.01	65.86	65.51	66.77	66.47	65.41	65.26	61.88	63.33	63.09	65.86	60.39	65.48	66.27	62.54	63.49	62	64.34
144	P. sichuanensis WCHPs060039	46.69	46.43	52.44	56.95	47.51	54.98	54.7	55.74	58.41	61.35	58	58.31	56.97	59.79	59.28	60.63	60.18	61.98	61.98	59.4	59.37	60.84	61.57	62.91	63	60.27	60.66	65.41	63.27	64.86	64.56	66.31	64.16	65.26	64.96	65.11	65.11	61.57	63.79	63.54	65.86	60.99	64.88	65.52	62.24	63.93	61.4	63.89
145	RW5S2*	46.39	48.36	53.47	56.36	47.07	55.72	54.85	57.79	58.11	62.41	59.04	59.06	57.42	59.64	59.58	61.98	61.83	61.83	61.83	61.65	59.97	62.18	61.72	62.76	63.73	60.56	61.25	66.16	65.97	65.46	65.01	66.16	66.42	66.77	66.77	64.95	64.81	62.78	63.18	62.93	65.71	61.14	66.07	66.12	62.69	63.79	63.04	65.53
146	P. mosselii ATCC BAA-99	46.39	48.36	53.62	56.51	47.21	55.72	54.85	57.79	58.11	62.41	59.04	59.21	57.42	59.64	59.58	61.98	61.83	61.83	61.83	61.65	59.97	62.33	61.72	62.76	63.73	60.56	61.25	66.16	66.12	65.46	65.01	66.16	66.42	66.77	66.77	64.95	64.81	62.78	63.33	63.09	65.86	61.14	66.07	66.27	62.84	63.79	63.04	65.53
147	P. mosselii BW11M1	46.24	48.21	53.32	56.51	46.92	55.57	54.85	57.79	58.11	62.56	59.19	58.91	57.57	59.79	59.73	61.83	61.68	61.98	61.98	61.5	59.82	62.03	61.57	62.91	63.58	60.71	61.1	66.31	66.12	65.31	65.16	66.31	66.57	66.92	66.92	65.11	64.96	62.63	63.33	63.09	65.86	61.29	66.07	66.27	62.84	63.93	63.19	65.68
148	BW18S1*	46.1	48.21	53.47	56.66	46.92	55.57	54.7	57.65	58.41	62.26	59.19	59.21	57.87	59.49	59.73	61.83	61.68	61.98	61.98	61.5	60.12	62.03	61.57	62.91	63.44	60.56	60.95	66.62	66.42	65.61	65.46	66.77	66.87	67.22	67.22	65.41	65.26	62.63	63.33	63.09	66.01	61.58	66.22	66.42	63.13	64.23	63.49	65.97
149	RW9S1A*	47.07	48.89	53.38	55.96	46.72	56.36	54.9	57.69	58.15	62.43	58.78	58.95	56.87	60.12	59.46	60.8	61.4	61.85	61.85	60.78	59.85	62.65	62.33	62.04	62.87	61.76	61.72	65.86	65.72	66.92	66.17	66.92	67.67	67.87	67.87	65.26	64.82	60.54	61.84	61.6	66.32	60.71	65.33	65.68	62.26	63.8	61.57	64.94
150	P. soli LMG 27941	46.1	48.07	53.32	56.36	47.95	54.68	54.1	56.18	57.96	60.15	60.69	58.91	57.72	59.49	58.38	60.78	60.33	60.33	60.33	61.35	59.22	60.99	61.28	61.87	63.44	59.08	60.51	65.41	64.47	65.46	64.1	66.01	65.81	65.86	65.86	64.65	64.51	60.82	61.21	60.97	64.65	60.54	64.43	66.27	61.79	62.3	61.85	64.04
151	BW16S1	46.98	47.32	54.21	57.1	47.36	54.98	54.25	56.03	59.29	61.65	58.3	59.06	57.27	59.49	60.63	61.38	61.23	62.13	62.13	61.05	60.27	62.63	62.46	63.2	62.56	61.6	61.25	65.41	64.92	65.76	64.56	67.07	66.27	67.07	66.47	65.71	65.56	61.88	63.64	63.39	66.62	60.54	66.22	66.27	63.58	64.53	62.44	64.64
152	BW16S3	46.83	47.62	54.36	56.95	47.36	55.13	54.7	56.03	58.7	61.65	58	58.91	56.97	59.79	60.63	60.93	60.93	61.68	61.68	60.6	59.67	62.48	62.02	62.76	62.11	61.6	61.7	65.11	64.92	65.76	64.86	66.62	65.96	66.77	66.47	65.86	65.41	61.88	63.33	63.09	66.77	60.84	66.37	65.97	63.43	64.23	61.85	64.34
153	BW16M2*	46.83	47.17	53.91	57.1	46.92	54.98	55.07	55.44	58.85	60.9	57.4	58.01	57.12	59.79	60.18	60.78	60.78	61.53	61.53	60.45	60.12	62.33	61.42	62.46	61.82	61	60.95	65.26	64.62	65.76	64.4	66.31	65.51	66.32	66.02	65.56	65.11	61.57	63.03	62.78	66.47	60.24	65.77	65.52	63.13	64.23	61.7	64.04
154	BW13M1*	47.28	47.92	54.51	56.8	47.21	55.27	54.48	56.03	58.7	61.5	58	59.06	57.12	59.79	60.63	61.23	61.23	61.68	61.68	60.75	60.12	62.63	62.17	62.61	62.26	61.6	61.85	65.11	64.92	66.06	64.71	66.62	65.81	66.62	66.32	65.56	65.41	62.03	63.18	62.93	66.77	60.39	66.37	65.82	63.28	64.38	61.7	64.19
155	P. fulva CIP 106765	46.1	47.77	53.91	58.14	47.72	56.55	56.5	55.59	59.14	61.2	57.85	58.76	56.67	59.04	56.89	58.53	59.13	59.43	59.43	58.05	58.32	58.89	59.94	59.94	59.77	57.9	57.82	63.75	65.77	65.71	63.75	65.2	64.25	64.01	64.01	63.29	63.16	59.3	62.73	62.33	65.86	59.79	65.63	64.33	62.39	64.07	61.98	63.45
156	P. parafulva DSM 17004	46.54	48.36	54.51	56.36	48.31	54.91	55.83	56.32	58.55	61.35	60.09	59.37	56.52	59.04	59.28	59.13	61.08	61.53	61.53	60.3	60.27	60.69	60.09	62.46	62.11	59.38	59.91	63.6	65.77	65.71	65.11	66.41	65.46	65.81	65.81	63.14	63.31	62.18	63.79	63.54	66.16	60.09	66.07	65.52	64.18	66.32	64.97	63.45
157	P. putida ATCC 12633	45.21	47.32	53.91	58.14	48.53	55.57	55.75	54.12	57.96	61.35	58.89	58.91	56.97	58.89	57.63	59.43	60.48	60.93	61.23	58.8	58.62	59.64	59.64	60.98	60.65	59.08	59.17	64.35	65.97	66.06	65.01	66.01	65.21	65.11	65.11	65.11	65.11	60.97	63.48	63.24	67.07	60.09	64.88	65.82	62.84	63.79	62.44	62.85
158	SWRI35	45.07	47.17	53.62	58.28	48.53	55.72	56.04	54.41	57.52	61.95	58.59	58.91	57.12	58.74	57.63	59.73	60.18	60.93	60.93	58.65	58.62	59.64	59.79	61.13	60.5	58.94	59.31	64.35	65.37	66.06	65.01	66.16	64.76	64.96	64.96	65.11	65.11	60.97	63.64	63.39	67.22	59.79	65.03	65.82	62.39	63.79	61.85	63
159	SWRI78	44.92	47.02	53.47	58.14	48.39	55.57	55.9	54.26	57.37	61.8	58.45	58.76	56.97	58.59	57.49	59.58	60.03	60.78	60.78	58.5	58.47	59.49	59.64	60.98	60.35	58.79	59.17	64.2	65.22	65.91	64.86	66.01	64.61	64.81	64.81	64.95	64.96	60.82	63.48	63.24	67.07	59.64	64.88	65.67	62.24	63.64	61.7	62.85
160	P. alloputida LMG 29756	45.66	47.77	53.62	56.95	47.8	54.98	54.85	54.71	57.37	60.75	58.15	58.61	57.27	58.89	59.13	59.88	60.18	61.38	61.38	58.95	58.02	60.09	60.09	61.13	60.5	58.05	59.02	63.6	65.22	65.91	65.01	64.95	65.36	65.26	64.96	63.75	63.76	62.33	63.94	63.69	67.22	61.29	64.73	64.33	63.13	64.38	63.49	63
161	RW1P2*	46.1	49.4	54.21	56.95	48.53	54.83	54.93	54.85	58.41	61.95	57.4	58.01	57.42	60.09	59.43	60.48	61.23	62.43	62.43	58.2	57.72	59.64	60.53	62.31	61.23	58.64	59.61	64.2	66.72	66.97	65.31	67.22	66.11	66.17	66.17	64.8	64.81	62.18	64.09	63.84	67.22	60.54	65.33	65.22	63.73	63.93	63.19	63.45
162	SWRI1	45.66	47.77	53.62	56.8	47.65	54.98	54.7	54.56	57.37	60.6	58.15	58.61	57.27	58.74	58.98	59.73	60.18	61.38	61.38	58.8	57.72	60.09	60.09	60.98	60.5	57.9	58.87	63.29	64.92	65.61	64.71	64.65	65.06	64.96	64.66	63.44	63.46	62.18	63.64	63.39	66.92	60.99	64.43	64.03	62.84	64.08	63.19	62.7
163	SWRI115	45.66	47.77	53.62	56.95	47.8	54.98	54.85	54.71	57.37	60.75	58.15	58.61	57.27	58.89	59.13	59.88	60.18	61.38	61.38	58.95	58.02	60.09	60.09	61.13	60.5	58.05	59.02	63.6	65.22	65.91	65.01	64.95	65.36	65.26	64.96	63.75	63.76	62.33	63.94	63.69	67.22	61.29	64.73	64.33	63.13	64.38	63.49	63
164	SWRI39	45.66	47.77	53.62	56.95	47.8	54.98	54.85	54.71	57.37	60.75	58.15	58.61	57.27	58.89	59.13	59.88	60.18	61.38	61.38	58.95	58.02	60.09	60.09	61.13	60.5	58.05	59.02	63.6	65.22	65.91	65.01	64.95	65.36	65.26	64.96	63.75	63.76	62.33	63.94	63.69	67.22	61.29	64.73	64.33	63.13	64.38	63.49	63
165	SWRI90	45.8	47.77	53.77	57.1	47.95	54.83	55	54.56	57.23	60.6	58.15	58.46	57.12	58.89	58.98	59.73	60.03	61.23	61.23	58.8	58.02	59.94	59.94	60.98	60.35	57.9	58.87	63.44	65.07	65.91	64.86	65.11	65.36	65.26	64.96	63.6	63.61	62.18	63.94	63.69	67.07	61.14	64.58	64.18	62.99	64.23	63.49	62.85
166	SWRI91	45.8	47.77	53.77	57.1	47.95	54.83	55	54.56	57.23	60.6	58.15	58.46	57.12	58.89	58.98	59.73	60.03	61.23	61.23	58.8	58.02	59.94	59.94	60.98	60.35	57.9	58.87	63.44	65.07	65.91	64.86	65.11	65.36	65.26	64.96	63.6	63.61	62.18	63.94	63.69	67.07	61.14	64.58	64.18	62.99	64.23	63.49	62.85
167	SWRI182	45.66	47.77	53.62	56.95	47.8	54.98	54.85	54.71	57.37	60.75	58.15	58.61	57.27	58.89	59.13	59.88	60.18	61.38	61.38	58.95	58.02	60.09	60.09	61.13	60.5	58.05	59.02	63.6	65.22	65.91	65.01	64.95	65.36	65.26	64.96	63.75	63.76	62.33	63.94	63.69	67.22	61.29	64.73	64.33	63.13	64.38	63.49	63
168	P. monteilii DSM 14164	46.69	49.4	54.51	56.51	48.09	54.38	54.78	55.29	58.11	61.95	58	58.01	57.72	59.94	59.28	60.33	60.63	61.98	61.98	58.2	57.72	59.64	60.09	62.17	61.67	58.64	59.46	64.35	66.72	66.97	65.31	66.77	65.96	65.86	65.86	64.5	64.51	62.48	63.03	62.78	67.52	61.58	66.22	65.52	63.13	64.38	63.34	63.89
169	RD8SR1	46.98	49.55	54.65	58.73	48.97	56.32	56.19	56.18	58.85	63.61	60.39	60.57	58.02	62.03	60.63	61.08	62.72	63.47	63.47	61.5	59.97	61.29	61.72	63.35	62.26	59.97	61.25	65.11	65.97	67.72	66.82	67.52	67.02	66.92	66.92	66.47	66.32	63.24	65.15	64.9	67.98	61.43	67.71	66.72	64.48	65.87	64.38	64.93
170	RD8PR2	46.98	49.55	54.65	58.73	48.97	56.32	56.19	56.18	58.85	63.61	60.39	60.57	58.02	62.03	60.63	61.08	62.72	63.47	63.47	61.5	59.97	61.29	61.72	63.35	62.26	59.97	61.25	65.11	65.97	67.72	66.82	67.52	67.02	66.92	66.92	66.47	66.32	63.24	65.15	64.9	67.98	61.43	67.71	66.72	64.48	65.87	64.38	64.93
171	RD8PR3	46.98	49.55	54.65	58.73	48.97	56.32	56.19	56.18	58.85	63.61	60.39	60.57	58.02	62.03	60.63	61.08	62.72	63.47	63.47	61.5	59.97	61.29	61.72	63.35	62.26	59.97	61.25	65.11	65.97	67.72	66.82	67.52	67.02	66.92	66.92	66.47	66.32	63.24	65.15	64.9	67.98	61.43	67.71	66.72	64.48	65.87	64.38	64.93
172	RD5PR2	46.39	48.81	53.47	57.54	48.68	55.42	55.45	55.29	58.26	63.16	60.24	59.67	57.42	61.14	60.63	61.08	62.72	63.32	63.32	61.05	59.52	60.84	61.13	62.61	61.38	59.68	60.36	64.2	65.37	66.82	65.76	66.77	66.27	66.17	66.17	66.16	66.02	62.33	64.55	64.3	66.92	60.09	66.67	65.67	63.43	65.13	63.64	63.74
173	RD8MR3*	46.98	49.55	54.51	58.58	48.97	56.32	56.04	56.03	59	63.76	60.54	60.42	58.02	62.03	60.78	61.23	62.87	63.62	63.62	61.65	60.12	61.43	61.72	63.2	62.41	60.12	61.1	65.11	66.12	67.72	66.67	67.67	67.02	66.92	66.92	66.47	66.32	63.09	65.3	65.05	68.13	61.43	67.86	66.72	64.63	66.02	64.53	64.93
174	RD9SR1*	46.69	49.7	54.36	58.28	48.53	56.02	56.04	56.32	59.59	63.91	60.54	59.97	58.02	62.18	60.93	61.68	63.02	63.77	63.77	61.5	60.57	61.73	61.87	63.2	62.26	60.27	61.4	65.56	66.27	67.57	66.67	67.52	66.87	66.92	66.92	66.16	66.02	63.09	65	64.75	68.43	62.03	67.71	66.72	64.78	66.32	64.98	65.23
175	RD6SR1	46.83	49.4	53.91	59.02	48.83	56.17	55.75	56.18	59.14	63.31	60.54	59.82	57.42	62.03	60.48	61.08	62.72	63.47	63.47	61.2	59.82	61.58	61.42	62.61	61.82	60.27	61.7	65.26	65.97	66.97	66.37	66.92	66.57	66.62	66.62	65.86	65.71	62.78	64.24	63.99	67.67	61.43	67.41	66.57	64.18	65.57	64.38	64.93
176	P. inefficax DSM 108619	46.24	48.51	54.21	58.88	48.97	54.68	55.15	55	58.41	62.11	59.64	58.91	57.72	60.09	59.73	61.23	61.38	61.53	61.53	60	59.67	60.69	61.13	62.46	61.53	58.94	60.51	64.65	65.37	65.91	64.71	66.16	65.51	65.71	65.71	65.26	65.26	61.42	63.79	63.54	67.37	60.69	66.82	65.97	63.73	64.83	63.34	63.15
177	P. persica LMG 29757	46.1	49.26	54.06	58.58	48.53	54.98	54.7	55.29	58.11	62.26	59.49	58.91	58.62	60.69	60.48	60.93	61.38	61.98	61.68	60	59.22	60.69	60.98	62.61	61.67	59.08	61.1	64.65	65.67	66.21	65.16	66.31	65.81	65.56	65.56	64.65	64.66	62.03	64.09	63.84	67.52	61.43	67.71	67.01	64.18	64.83	64.83	64.49
178	P. asiatica RYU5	45.8	47.92	53.47	57.54	48.53	54.68	54.85	55.88	58.26	62.56	59.19	58.01	57.72	60.39	60.63	61.38	61.38	61.98	61.98	60.9	59.97	61.73	62.02	62.91	62.41	59.82	60.51	64.8	65.07	65.91	65.46	66.92	65.06	65.26	65.26	65.11	64.96	62.18	65	64.75	67.07	60.69	66.07	65.97	63.43	64.98	63.93	64.49
179	RD4SR1	45.66	47.92	53.18	57.25	48.39	54.38	54.55	55.74	58.11	62.41	59.19	58.01	57.57	60.24	60.48	61.23	61.23	61.83	61.83	60.9	59.82	61.58	61.87	62.76	62.26	59.68	60.36	64.65	64.92	65.76	65.31	66.77	64.91	65.11	65.11	64.95	64.81	61.88	64.85	64.6	66.92	60.54	65.92	65.82	63.28	64.83	63.79	64.34
180	RD9PR3	45.66	47.92	53.18	57.25	48.39	54.38	54.55	55.74	58.11	62.41	59.19	58.01	57.57	60.24	60.48	61.23	61.23	61.83	61.83	60.9	59.82	61.58	61.87	62.76	62.26	59.68	60.36	64.65	64.92	65.76	65.31	66.77	64.91	65.11	65.11	64.95	64.81	61.88	64.85	64.6	66.92	60.54	65.92	65.82	63.28	64.83	63.79	64.34
181	RD5PR1	45.8	48.07	53.32	57.4	48.53	54.53	54.7	55.88	58.26	62.56	59.34	58.16	57.72	60.39	60.63	61.38	61.38	61.98	61.98	61.05	59.97	61.73	62.02	62.91	62.41	59.82	60.51	64.8	65.07	65.91	65.46	66.92	65.06	65.26	65.26	65.11	64.96	62.03	65	64.75	67.07	60.69	66.07	65.97	63.43	64.98	63.93	64.49
182	RD1SR1	45.8	48.07	53.32	57.4	48.53	54.53	54.7	55.88	58.26	62.56	59.34	58.16	57.72	60.39	60.63	61.38	61.38	61.98	61.98	61.05	59.97	61.73	62.02	62.91	62.41	59.82	60.51	64.8	65.07	65.91	65.46	66.92	65.06	65.26	65.26	65.11	64.96	62.03	65	64.75	67.07	60.69	66.07	65.97	63.43	64.98	63.93	64.49
183	RD2SR3	45.8	48.07	53.32	57.1	48.39	54.23	54.7	55.74	57.96	62.41	59.19	58.01	57.57	60.24	60.33	61.08	61.08	61.83	61.83	60.9	59.82	61.73	61.87	62.76	62.11	59.53	60.21	64.5	64.77	65.61	65.16	66.62	64.76	64.96	64.96	64.8	64.66	61.88	64.7	64.45	66.92	60.69	65.92	65.82	63.28	64.98	63.79	64.49
184	RD7SR1	45.8	48.07	53.47	57.54	48.68	54.38	54.55	55.88	58.41	62.41	59.34	58.16	57.87	60.39	60.78	61.53	61.23	62.13	62.13	60.9	59.82	61.58	62.17	62.76	62.41	59.82	60.36	64.8	65.22	65.91	65.46	66.92	65.06	65.26	65.26	65.11	64.96	62.18	64.85	64.6	67.22	60.84	66.22	66.12	63.58	65.13	63.79	64.34
185	RD1PR2	45.95	48.07	53.47	57.54	48.68	54.68	54.85	55.74	58.11	62.71	59.19	58.31	57.57	60.54	60.48	61.23	61.53	61.83	61.83	61.2	60.12	61.88	62.17	63.06	62.26	59.97	60.66	64.65	65.22	66.06	65.61	66.77	64.91	65.11	65.11	65.26	65.11	61.88	65.15	64.9	67.22	60.54	66.22	65.82	63.28	64.83	64.08	64.64
186	RD9PR1	45.8	47.92	53.32	57.4	48.53	54.53	54.7	55.59	57.96	62.56	59.04	58.16	57.42	60.39	60.33	61.08	61.38	61.68	61.68	61.05	59.97	61.73	62.02	62.91	62.11	59.82	60.51	64.5	65.07	65.91	65.46	66.62	64.76	64.96	64.96	65.11	64.96	61.72	65	64.75	67.07	60.39	66.07	65.67	63.13	64.68	63.93	64.49
187	RD3SR1	45.95	48.07	53.47	57.54	48.68	54.68	54.85	55.74	58.11	62.71	59.19	58.31	57.57	60.54	60.48	61.23	61.53	61.83	61.83	61.2	60.12	61.88	62.17	63.06	62.26	59.97	60.66	64.65	65.22	66.06	65.61	66.77	64.91	65.11	65.11	65.26	65.11	61.88	65.15	64.9	67.22	60.54	66.22	65.82	63.28	64.83	64.08	64.64
188	P. pyomelaminifaciens MR 02	45.8	47.92	53.47	57.54	48.53	54.68	54.85	55.88	58.26	62.56	59.19	58.01	57.72	60.39	60.63	61.38	61.38	61.98	61.98	60.9	59.97	61.73	62.02	62.91	62.41	59.82	60.51	64.8	65.07	65.91	65.46	66.92	65.06	65.26	65.26	65.11	64.96	62.18	65	64.75	67.07	60.69	66.07	65.97	63.43	64.98	63.93	64.49
189	P. shirazica LMG 29953	45.8	47.92	53.47	57.69	48.53	54.68	54.85	55.88	58.41	62.41	59.34	57.85	57.87	60.24	60.63	61.53	61.23	61.83	61.83	60.75	59.82	61.73	62.02	62.76	62.26	59.82	60.51	64.65	65.07	65.76	65.46	66.77	65.06	65.26	65.26	64.95	64.81	62.03	64.85	64.6	66.92	60.84	65.92	65.82	63.28	64.83	63.79	64.49
190	P. agarici ATCC 25941	45.44	51.71	53.97	54.64	47.29	56.87	55.85	56.32	58.05	62.84	62.13	62.2	60.57	62.18	60.75	60.9	62.97	64.02	63.42	61.77	61.29	62.87	61.81	62.85	61.91	61.69	61.34	67.62	68.32	69.89	68.23	69.55	68.33	68.48	68.48	66.87	67.92	64.6	64.55	64.6	69.91	61.86	66.82	66.52	65.92	67.77	64.46	64.42
191	P. batumici UCM B-321	47.94	52.16	55	55.38	46.27	56.57	56.67	56.47	60.56	64.95	61.38	60.24	61.32	63.23	62.86	62.71	64.02	63.87	64.17	61.62	61.88	63.02	62.7	63.3	62.21	62.43	61.79	69.44	70.12	70.5	70.5	71.52	71.34	71.64	71.64	67.62	68.67	65.66	66.06	66.11	69.76	61.41	68.01	68.17	66.52	67.62	65.21	67.26
192	P. asplenii LMG 2137	47.07	49.04	53.59	55.34	48.1	56.82	55.96	56.89	58.85	66.22	61.76	61.23	61.25	62.7	60.69	61.88	63.64	63.64	63.93	62.89	61.22	61.46	61.6	62.78	61.26	60.59	60.24	67.37	69.4	70.08	68.87	71.23	69.42	68.97	68.97	65.12	65.87	63.16	64.01	64.06	69.94	59.7	66.86	67.76	64.63	65.27	64.37	64.78
193	RW8P3*	47.74	49.56	54.16	55.64	45.92	55.69	54.97	57.25	59.09	65.21	62.2	61.29	61.9	63	61.46	62.8	63.95	64.39	64.39	63.39	62.61	64.63	63.7	64.3	62.76	61.5	62.8	68.71	69.09	70.31	69.72	69.87	69.7	69.85	70.15	66.92	67.66	64.97	64.92	64.97	69.28	60.95	66.77	67.06	65.13	65.62	64.57	65.57
194	P. fuscovaginae LMG 2158	47.21	48.96	53.67	55.28	48.25	56.61	55.75	56.6	58.85	66.02	61.85	61.02	61.34	62.65	60.63	61.68	63.73	63.73	64.03	62.69	61.01	61.55	61.69	62.87	61.35	60.82	60.48	67.32	69.36	70.03	68.83	71.19	69.67	69.22	69.22	65.07	65.82	63.1	63.95	64.01	69.74	59.79	66.52	67.71	64.57	65.52	64.47	64.58
195	P. protegens DSM 19095	46.03	49.48	54.71	55.82	49.05	56.42	57.35	56.76	59.08	62.69	61.23	60.84	60.72	61.58	62.11	62.11	62.67	64.32	64.32	62.37	61.43	63.17	61.81	62.56	61.76	59.91	61.94	68.38	69.07	69.89	68.68	68.94	69.23	69.08	69.08	66.27	66.72	64.6	64.24	64.3	69.15	61.86	66.82	69.22	66.37	67.47	65.66	65.47
196	P. saponiphila DSM 9751	45.51	49.25	54.34	55.74	49.49	57.46	57.65	56.62	58.71	63.14	60.18	61.67	60.79	61.36	60.83	61.88	63.04	63.64	63.64	61.54	61.21	62.65	61.89	62.48	61.4	60.28	60.97	67.85	67.64	69.67	68.31	69.62	68.55	68.25	68.85	65.89	66.49	63.01	64.92	64.98	68.77	61.41	66.59	68.47	65.39	67.55	65.44	65.55
197	P. chlororaphis subsp. aurantiaca LMG 21630	47.21	50.67	53.82	55.82	48.61	57.16	57.05	55	59.08	61.63	60.78	60.69	61.47	61.73	59.85	59.85	62.97	62.67	62.67	60.72	62.03	62.57	59.58	61.07	59.71	59.17	61.34	66.41	67.12	69.14	67.93	68.18	68.48	68.63	68.63	65.96	66.87	64.45	63.79	63.84	67.78	60.81	66.82	67.72	64.41	66.57	65.06	63.98
198	P. chlororaphis subsp. chlororaphis DSM 50083	47.65	50.52	53.82	55.38	48.17	56.87	57.12	54.71	59.23	61.33	60.33	60.54	61.62	62.33	60.6	60.6	63.57	63.57	63.57	61.17	62.03	63.17	60.03	61.07	60.15	58.88	60.9	66.87	67.42	68.99	67.78	68.18	68.78	68.93	68.93	66.42	67.47	64.75	64.39	64.45	67.63	60.66	65.92	67.87	65.02	66.42	65.06	63.23
199	P. chlororaphis subsp. aureofaciens LMG 1245	47.21	50.37	54.12	55.08	48.02	56.87	57.65	55.15	59.53	61.48	60.93	61.14	61.47	61.73	60.6	60.45	63.57	63.57	63.57	61.02	61.73	63.02	60.33	61.66	60.44	59.32	61.64	66.72	67.42	69.29	68.08	68.48	69.08	69.23	69.23	66.42	67.32	64.9	63.79	63.84	68.39	61.71	66.82	67.87	65.02	67.17	65.21	64.13
200	P. chlororaphis subsp. piscium DSM 21509	47.35	50.07	54.26	55.08	48.02	56.42	56.9	55	58.79	61.63	60.48	60.84	61.17	62.03	60	59.85	63.12	63.27	63.27	60.72	61.58	62.57	59.73	61.22	60	58.73	61.19	65.96	66.97	68.99	67.78	68.18	68.78	69.08	69.08	65.96	66.87	64.6	64.09	64.15	68.09	60.81	66.22	68.02	65.17	66.57	64.91	63.98
201	P. corrugata LMG 2172	46.47	50.07	54.41	56.26	48.46	57.61	57.87	56.62	60.12	63.75	61.53	61.75	60.87	62.48	61.65	61.8	63.87	63.42	63.72	62.37	62.03	61.98	60.77	62.56	62.5	60.8	62.54	68.38	70.12	69.74	68.99	71.21	68.48	68.93	68.93	67.17	67.92	65.81	65.61	65.36	69.3	61.56	66.97	68.17	65.32	67.77	65.81	65.62
202	P. mediterranea CFBP 5447	46.47	49.18	54.12	56.26	47.29	57.31	57.27	56.76	59.82	64.65	61.23	61.6	61.32	62.93	61.5	61.5	63.27	62.67	62.97	61.32	62.03	62.57	61.52	62.7	63.09	61.09	62.69	68.38	70.12	69.44	68.84	71.21	67.87	68.17	68.17	67.32	68.07	64.6	65	64.75	68.39	62.01	67.41	67.72	65.62	66.87	65.51	66.37
203	P. thivervalensis CFBP 11261	47.35	50.52	54.56	56.85	48.32	55.67	57.27	56.76	58.94	64.35	63.02	62.35	61.47	63.98	60.75	61.05	63.72	63.42	63.72	61.77	62.03	63.17	61.81	62.56	62.35	62.28	62.99	67.62	68.62	70.05	68.53	69.85	68.02	67.72	67.42	65.81	67.32	64.3	65	65.05	69.91	62.16	66.82	68.62	65.92	67.77	65.66	66.22
204	SWRI196*	46.18	50.97	53.82	55.96	48.9	56.27	56.97	56.18	57.75	63.29	61.83	62.5	61.17	62.48	60.45	60.9	63.87	62.97	62.97	61.92	62.18	63.02	60.77	61.52	62.06	61.39	62.54	66.87	68.32	68.99	67.93	69.85	67.87	67.72	67.42	65.66	67.17	64.15	64.55	64.6	68.84	61.26	66.97	67.57	65.32	67.47	65.96	65.17
205	SWRI11	46.18	50.97	53.82	55.96	48.9	56.27	56.97	56.18	57.75	63.29	61.83	62.5	61.17	62.48	60.45	60.9	63.87	62.97	62.97	61.92	62.18	63.02	60.77	61.52	62.06	61.39	62.54	66.87	68.32	68.99	67.93	69.85	67.87	67.72	67.42	65.66	67.17	64.15	64.55	64.6	68.84	61.26	66.97	67.57	65.32	67.47	65.96	65.17
206	SWRI121	46.03	50.67	53.38	55.38	48.46	55.82	56.82	55.74	57.31	62.84	61.68	62.05	60.72	62.03	60	60.45	63.42	62.52	62.52	61.47	61.73	62.57	60.48	61.07	61.76	60.95	62.09	66.41	68.02	68.68	67.62	69.55	67.57	67.42	67.12	65.36	66.87	63.84	64.24	64.3	68.39	60.81	66.52	66.97	64.86	67.02	65.51	64.72
207	SWRI8	46.03	50.82	53.53	56.11	48.76	56.12	56.97	56.03	57.61	63.29	61.83	62.35	61.17	62.63	60.45	60.6	63.57	62.97	62.97	61.62	61.88	62.87	60.48	61.52	61.76	61.39	62.24	66.87	68.32	68.68	67.93	69.85	67.87	67.72	67.42	65.66	67.17	63.84	64.55	64.6	68.84	61.41	66.97	67.72	65.32	67.47	65.96	65.17
208	SWRI4	46.32	51.12	53.97	56.55	49.05	55.97	57.27	56.62	57.46	63.14	61.83	62.65	61.17	62.78	60.45	60.6	63.42	62.82	62.82	61.62	61.88	62.87	60.92	61.66	61.62	61.39	62.54	66.87	68.47	68.53	68.38	69.7	68.17	67.72	67.72	65.66	67.17	63.99	64.39	64.45	68.84	61.56	66.82	67.72	65.17	67.32	65.81	65.47
209	SWRI150	46.62	50.67	54.26	56.85	48.61	55.52	56.97	56.47	57.46	63.14	61.23	62.2	60.42	62.78	60.15	59.85	63.72	62.52	62.52	61.32	61.73	62.57	60.62	61.37	61.62	61.54	62.24	66.57	68.17	68.23	68.38	69.7	68.33	67.72	67.72	65.36	66.72	63.84	64.24	64.3	68.54	60.96	66.67	67.72	64.86	66.57	65.36	65.47
210	SWRI164	46.62	50.67	54.26	56.85	48.61	55.52	56.97	56.47	57.46	63.14	61.23	62.2	60.42	62.78	60.15	59.85	63.72	62.52	62.52	61.32	61.73	62.57	60.62	61.37	61.62	61.54	62.24	66.57	68.17	68.23	68.38	69.7	68.33	67.72	67.72	65.36	66.72	63.84	64.24	64.3	68.54	60.96	66.67	67.72	64.86	66.57	65.36	65.47
211	SWRI155	46.32	50.37	54.26	56.55	48.32	55.52	56.97	56.47	57.46	63.14	61.23	62.2	60.42	62.78	60.15	59.85	63.42	62.52	62.52	61.32	61.73	62.57	60.62	61.37	61.62	61.54	62.24	66.57	68.17	68.23	68.38	69.7	68.33	67.72	67.72	65.36	66.72	63.84	64.24	64.3	68.54	60.96	66.67	67.72	64.86	66.57	65.36	65.47
212	SWRI21	46.62	50.67	54.41	56.85	48.61	55.52	56.97	56.62	57.61	63.29	61.38	62.2	60.57	62.78	60.3	60	63.87	62.67	62.67	61.47	61.88	62.57	60.77	61.52	61.76	61.69	62.39	66.72	68.32	68.38	68.53	69.85	68.48	67.87	67.87	65.51	66.87	63.99	64.39	64.45	68.69	60.96	66.67	67.72	65.02	66.72	65.51	65.62
213	PGSB 8167	47.21	50.07	54.56	56.55	48.32	55.67	56.97	56.76	58.64	64.2	63.02	62.05	61.17	63.68	60.6	60.9	63.42	63.27	63.57	61.47	61.88	63.32	61.96	62.41	62.06	62.13	62.99	67.62	68.62	69.74	68.23	70	67.72	67.42	67.12	65.96	67.47	64.15	65.15	65.2	69.76	62.31	66.37	68.32	65.77	67.32	65.66	66.07
214	PGSB 8423	47.21	50.07	54.56	56.55	48.32	55.67	56.97	56.76	58.64	64.2	63.02	62.05	61.17	63.68	60.6	60.9	63.42	63.27	63.57	61.47	61.88	63.32	61.96	62.41	62.06	62.13	62.99	67.62	68.62	69.74	68.23	70	67.72	67.42	67.12	65.96	67.47	64.15	65.15	65.2	69.76	62.31	66.37	68.32	65.77	67.32	65.66	66.07
215	P. brassicacearum subsp. brassicacearum DSM 13227	46.32	50.52	54.56	56.26	48.32	56.27	56.37	57.21	58.35	64.8	62.28	61.45	61.17	62.78	61.2	61.5	62.52	62.67	62.97	62.67	61.73	63.02	61.52	62.7	61.76	61.24	62.69	67.78	68.47	70.05	68.38	69.85	68.02	67.87	67.57	65.51	66.87	64.15	64.24	64.3	68.84	62.01	66.67	67.72	65.17	67.02	65.06	65.92
216	SWRI12*	46.91	49.78	54.41	55.96	48.61	56.27	55.62	57.06	58.49	64.35	62.13	61.45	61.32	62.18	59.85	60.75	62.82	62.67	62.97	62.37	61.73	63.17	61.37	62.26	62.21	61.83	61.94	68.08	68.77	69.44	68.53	70.15	68.48	67.87	67.57	65.36	66.57	64.15	65	65.05	69	62.31	66.37	68.17	65.77	67.62	66.11	66.07
217	SWRI15	46.91	49.78	54.41	55.96	48.61	56.27	55.62	57.06	58.49	64.35	62.13	61.45	61.32	62.18	59.85	60.75	62.82	62.67	62.97	62.37	61.73	63.17	61.37	62.26	62.21	61.83	61.94	68.08	68.77	69.44	68.53	70.15	68.48	67.87	67.57	65.36	66.57	64.15	65	65.05	69	62.31	66.37	68.17	65.77	67.62	66.11	66.07
218	SWRI13	46.62	49.78	54.41	56.11	48.61	56.12	55.62	56.76	58.49	64.05	62.13	61.45	61.02	62.18	60.15	61.05	62.52	62.97	63.27	62.07	61.73	63.02	61.37	62.11	62.21	61.54	62.09	67.93	68.92	69.59	68.38	70	68.33	67.72	67.42	65.51	66.72	64.15	65.15	65.2	69.3	62.46	66.37	68.47	65.92	67.92	66.11	66.07
219	SWRI110	46.62	49.78	54.26	56.11	48.61	56.12	55.62	56.62	58.35	63.9	61.98	61.45	60.87	62.18	60	60.9	62.37	62.82	63.12	61.92	61.58	63.02	61.22	61.96	62.06	61.39	61.94	67.78	68.77	69.44	68.23	69.85	68.17	67.57	67.27	65.36	66.57	63.99	65	65.05	69.15	62.46	66.37	68.47	65.77	67.77	65.96	65.92
220	SWRI179*	46.76	49.93	54.56	56.26	48.46	56.27	55.77	56.91	58.35	64.35	61.98	61.45	61.17	62.48	59.85	60.45	62.37	62.37	62.67	62.22	61.58	63.17	61.37	62.11	61.91	61.39	61.79	67.78	68.47	69.44	68.23	69.7	68.33	68.02	67.72	65.21	66.42	63.84	65	65.05	68.69	62.46	66.37	68.17	65.47	67.32	65.96	65.77
221	SWRI92*	47.21	50.22	53.68	57	48.17	55.52	57.35	56.32	58.49	64.05	61.53	60.54	61.02	63.08	60.15	61.05	62.37	61.92	62.22	62.22	61.88	62.72	61.22	61.66	61.91	60.36	62.24	68.08	69.52	68.84	69.29	69.7	68.17	67.87	68.17	66.42	67.02	64.3	64.24	64.3	69.15	62.01	66.67	68.77	65.32	66.42	65.66	65.17
222	SWRI102*	47.21	50.22	53.68	57	48.17	55.52	57.35	56.32	58.49	64.05	61.53	60.54	61.02	63.08	60.15	61.05	62.37	61.92	62.22	62.22	61.88	62.72	61.22	61.66	61.91	60.36	62.24	68.08	69.52	68.84	69.29	69.7	68.17	67.87	68.17	66.42	67.02	64.3	64.24	64.3	69.15	62.01	66.67	68.77	65.32	66.42	65.66	65.17
223	SWRI16	47.35	50.37	53.38	56.7	48.46	55.37	57.5	56.03	58.35	63.75	61.38	60.39	60.87	62.93	60	60.9	62.22	61.77	62.07	62.37	61.73	62.57	61.07	61.52	61.62	60.21	62.24	67.93	69.22	68.53	69.29	69.55	68.02	67.72	68.02	66.11	66.72	64.15	64.09	64.15	68.84	61.71	66.37	68.47	65.02	66.11	65.36	64.87
224	SWRI154*	47.5	50.37	53.09	56.26	48.46	55.52	56.45	56.03	57.9	63.9	61.38	60.54	61.32	62.93	60.3	61.5	62.52	61.77	62.07	62.52	62.03	63.02	61.37	61.37	62.06	60.36	62.09	67.78	68.92	68.53	68.23	69.24	67.42	67.12	67.42	65.96	66.57	64.15	64.09	64.15	69	61.56	66.67	68.17	65.17	66.42	65.66	64.87
225	P. kilonensis DSM 13647	46.4	50	54.26	55.87	48.32	55.72	55.82	56.76	58.35	64.31	62.16	61.93	61.2	63.08	60.75	61.05	62.22	62.07	62.37	63.01	62.07	62.39	61.39	61.69	61.32	61.39	63.28	68.23	68.82	69.34	67.98	69.74	67.62	67.47	67.47	66.06	67.17	63.99	64.95	64.9	69.45	61.86	66.82	67.72	64.86	66.47	64.81	65.32
226	SWRI108*	47.21	51.56	54.12	56.41	47.73	56.87	56.82	57.44	58.58	64.5	62.13	61.45	61.47	63.98	62.14	61.84	63.16	63.46	63.46	62.52	62.72	64.22	61.52	62.41	61.91	61.39	63.58	68.84	69.22	70.35	69.29	70	68.17	68.02	68.33	66.41	67.93	65.2	65.15	65.2	69.82	62.5	67.02	67.77	65.66	67.52	65.26	66.12
227	SWRI122	47.5	51.42	54.26	56.55	47.73	56.87	56.97	57.58	58.43	64.65	61.98	61.14	61.47	63.68	62.29	62.14	63.01	63.61	63.61	62.37	62.72	64.22	61.66	62.56	61.76	61.54	63.43	68.84	69.37	70.2	69.44	70.15	68.33	68.17	68.48	66.41	67.93	65.05	65	65.05	69.82	62.65	67.02	68.07	65.96	67.67	65.56	66.12
228	P. prosekii LMG 26867	47.14	49.55	53.15	55.87	48.25	57.59	58.07	55.64	59.41	62.41	61.1	59.52	60	61.01	60.48	60.33	62.09	61.64	61.64	60.75	60.42	60.8	60.21	61.83	60.03	60.97	60.77	68.22	68.11	67.12	67.72	69.53	66.62	66.77	66.62	65.07	66.27	64.76	63.2	63.25	68.53	60.99	64.14	66.67	64.72	66.12	64.92	63.39
229	P. mandelii LMG 21607	46.27	48.81	52.71	55.57	48.69	56.55	57.55	55.78	56.76	61.35	60.8	60.42	60.9	60.57	59.13	60.78	61.94	61.64	61.64	60.45	60.27	60.36	59.02	59.76	59.15	59.65	59.73	67.17	67.81	68.02	66.82	67.87	66.62	66.17	66.17	63.72	64.92	63.4	63.05	63.1	68.84	60.09	64.14	66.22	64.42	66.12	64.47	62.65
230	P. arsenicoxydans CECT 7543	45.88	49.03	52.79	55.52	48.76	57.46	56.22	54.85	57.02	61.93	60.48	60.99	60.72	60.54	59.1	59.1	61.77	61.47	61.47	59.67	60.09	60.33	59.29	60.03	59.12	59.47	60.45	66.72	66.82	67.02	66.41	67.58	65.76	65.61	65.61	63.4	64.46	64.3	64.55	64.6	68.24	61.11	65.17	66.07	63.66	66.42	64.01	62.48
231	P. frederiksbergensis DSM 13022	45.97	49.11	53.29	55.87	48.54	57.44	56.95	55.49	57.5	62.11	61.25	61.77	61.79	61.01	60.33	60.18	62.99	62.84	62.84	60.75	61.31	61.25	60.21	60.95	60.03	60.24	60.92	66.87	67.96	68.17	67.57	68.93	66.77	67.22	67.22	64.47	65.67	64.61	64.56	64.61	69.74	61.43	65.63	66.52	65.32	67.17	65.07	63.54
232	P. migulae CCUG 43165	46.18	49.63	52.94	55.96	48.9	56.72	56.97	55.74	57.02	61.18	61.38	60.69	60.87	62.18	60.15	60.6	63.12	62.37	62.37	60.87	60.24	61.08	59.88	60.62	60.29	60.65	60.9	67.62	68.47	69.14	67.47	69.7	68.17	67.57	67.27	64.91	65.66	64.9	63.79	63.84	68.69	61.56	65.47	68.17	64.56	66.87	65.51	63.68
233	P. lini CIP 107460	46.32	49.78	53.09	55.96	48.76	56.42	56.52	56.18	58.05	61.78	61.53	60.69	62.22	61.73	59.55	60.45	62.22	61.62	61.62	61.02	60.09	61.98	60.48	61.37	60.74	59.76	60.9	67.93	68.47	69.14	68.23	69.09	67.57	67.12	67.12	64.91	65.81	64.9	63.79	63.84	69.3	61.41	65.17	67.12	64.71	66.42	64.91	63.53
234	P. silesiensis A3	46.18	50.22	53.53	56.55	48.61	56.42	56.82	55.88	58.49	62.39	62.28	61.45	61.32	62.33	60.75	61.5	63.72	62.97	62.97	61.47	61.58	62.28	60.77	61.52	61.18	60.8	61.04	68.08	68.62	70.2	68.38	69.55	68.33	68.02	68.33	65.21	66.57	64.75	64.39	64.45	70.36	61.11	66.07	67.57	65.32	67.02	65.36	63.68
235	P. baetica CECT 7720	47.13	52.4	53.24	56.55	48.61	57.91	56.75	57.06	57.9	62.54	61.02	60.81	60.96	62.93	62.26	60.9	62.22	62.82	62.97	61.41	61.38	63.47	61.81	62.56	61.18	61.09	61.64	66.97	67.37	69.24	68.03	69.2	67.98	67.22	67.52	65.91	66.97	64.15	65.36	65.66	69.3	62.44	65.97	66.87	65.81	68.38	64.75	64.62
236	P. koreensis LMG 21318	46.83	50.75	53.24	55.23	49.19	55.97	57.2	55	57.75	60.42	60.12	60.66	59.46	60.99	60.15	60.45	62.37	61.62	61.62	60.21	60.03	63.47	60.77	61.07	60.44	60.06	61.19	66.36	67.22	67.88	66.97	67.83	67.22	66.62	66.62	64.25	65.31	64.45	64.45	64.75	67.48	61.39	65.22	66.87	64.31	67.47	64.9	63.87
237	PGSB 8459*	46.18	51.42	52.94	56.55	49.49	56.42	56.9	55.74	57.75	61.63	60.33	60.99	59.82	63.08	60.45	60.15	62.52	62.07	62.07	60.72	59.64	63.77	61.66	62.26	61.32	60.95	62.24	65.96	67.27	68.99	67.02	68.64	68.17	67.12	67.12	65.21	66.27	64.3	64.7	64.75	68.54	61.11	65.62	66.67	64.41	66.57	65.21	63.68
238	P. kribbensis DSM 100278	47.28	51.5	52.79	56.55	48.76	56.57	57.2	55.59	58.64	62.69	61.77	59.31	61.11	62.48	61.35	61.65	62.67	62.52	62.52	62.16	60.48	62.87	61.81	62.11	61.62	60.36	61.49	67.12	68.87	69.55	66.97	69.65	68.58	68.28	68.28	66.06	67.12	63.99	64.9	65.2	69.3	61.39	66.42	67.62	65.36	65.96	63.99	64.47
239	P. fluorescens BW11P2	46.62	50.07	53.09	55.82	49.49	56.87	57.35	55.59	57.75	62.08	60.18	59.64	60.57	62.18	59.7	60.15	62.97	61.17	61.47	61.92	60.69	62.13	62.11	61.37	60.15	59.62	60.9	67.02	67.12	67.47	66.57	68.18	67.72	67.72	67.42	64.16	64.76	65.2	63.64	63.39	68.24	60.21	65.92	66.07	63.06	64.46	64.01	64.42
240	PGSB 8569	47.28	51.8	53.68	55.67	50.22	57.76	56.97	55.74	57.61	61.78	59.52	59.73	59.61	60.99	60.3	59.4	61.77	61.32	61.32	60.36	59.58	62.28	60.03	60.03	59.85	59.47	61.04	65.61	66.77	68.18	65.91	68.89	67.07	66.47	66.47	63.65	64.86	63.99	64.85	64.9	69.01	61.09	64.56	65.01	64.56	67.02	64.45	63.06
241	P. crudilactis UCMA 17988	47.28	51.35	53.68	55.52	50.07	57.91	57.27	56.03	57.61	61.78	59.82	59.64	59.76	60.84	60.3	59.4	61.77	61.32	61.32	60.36	59.58	62.13	60.18	60.03	59.71	59.76	61.19	65.45	66.62	68.18	65.91	68.74	67.07	66.47	66.47	63.8	65.01	63.84	64.85	64.9	69.16	61.24	64.62	65.06	64.61	67.32	64.6	63.12
242	OE 48.2*	46.54	50.6	53.68	55.52	49.63	57.61	57.57	56.32	57.75	61.93	60.27	59.28	59.46	61.88	60.3	59.85	61.77	61.47	61.47	60.96	59.88	63.02	60.92	60.03	60.88	60.21	61.34	66.21	67.82	68.79	66.82	69.04	67.67	66.92	66.92	64.86	65.76	63.69	64.85	64.9	68.7	61.09	64.86	65.91	64.86	67.17	65.05	63.96
243	OE 49.2	46.54	50.6	53.53	55.52	49.63	57.61	57.57	56.18	57.61	61.78	60.12	59.28	59.31	61.88	60.15	59.7	61.62	61.32	61.32	60.81	59.73	63.02	60.77	59.88	60.74	60.06	61.19	66.06	67.67	68.64	66.67	68.89	67.52	66.77	66.77	64.71	65.61	63.54	64.7	64.75	68.55	61.09	64.86	65.91	64.71	67.02	64.9	63.81
244	PGSB 7947	46.69	50.75	53.68	55.38	49.63	57.76	58.02	56.32	57.61	61.48	60.27	59.28	58.86	61.73	60.45	59.85	61.62	61.32	61.32	60.66	59.43	62.87	60.33	59.88	60.74	60.21	61.19	65.91	67.52	68.64	66.52	68.89	67.67	66.92	66.92	64.56	65.46	63.69	64.55	64.6	68.55	61.09	64.71	65.91	64.56	67.02	65.2	63.96
245	ZA 5.3*	46.98	51.35	53.09	55.52	49.19	57.76	56.97	56.03	57.61	61.63	60.42	60.18	59.46	61.73	60.75	59.55	62.22	61.62	61.62	60.06	59.58	61.83	60.18	60.18	60.15	59.62	61.19	65.45	67.07	68.94	65.91	68.13	67.37	66.47	66.47	64.25	65.01	64.15	65.45	65.2	69.01	60.63	65.32	65.91	65.01	67.62	65.66	63.96
246	P. helmanticensis CECT 8548	46.54	50.9	53.82	56.26	49.63	57.76	57.42	56.03	57.61	61.03	59.82	60.09	59.61	61.43	60	59.25	61.62	62.07	62.07	60.36	59.88	61.98	60.33	60.33	60.15	59.62	60.15	65	66.77	68.94	65.91	69.04	67.37	66.77	66.77	64.4	65.46	63.54	64.39	64.45	68.24	60.94	64.62	66.42	64.91	67.47	65.36	63.27
247	SWRI189	46.91	50.67	52.35	56.55	48.61	56.42	57.72	56.32	57.61	63.44	60.93	59.94	59.82	63.08	60.3	59.85	62.67	62.52	62.52	61.77	61.14	64.67	61.96	62.26	62.06	61.83	61.34	65.81	67.87	70.05	67.17	69.7	69.08	68.48	68.48	65.51	66.27	64.15	64.85	65.05	68.39	61.11	65.32	66.52	65.17	67.17	66.11	63.53
248	SWRI129	47.35	50.67	52.65	56.41	49.19	56.12	57.42	56.32	58.05	63.14	60.93	60.39	60.12	62.33	60.6	60.45	62.67	62.22	62.22	61.47	60.99	64.37	61.66	61.81	62.21	61.24	61.34	65.81	68.17	69.59	66.87	69.85	68.33	67.72	67.72	65.36	66.27	64.45	64.24	64.3	68.09	61.41	65.32	66.82	64.56	66.57	65.51	63.23
249	P. granadensis LMG 27940	46.91	50.67	52.5	56.55	48.61	56.42	57.72	56.47	57.75	63.6	61.08	59.94	59.97	63.08	60.45	60	62.82	62.67	62.67	61.92	61.29	64.67	62.11	62.41	62.21	61.98	61.49	65.96	68.02	70.2	67.32	69.85	69.23	68.63	68.63	65.66	66.42	64.3	65	65.2	68.54	61.11	65.32	66.52	65.32	67.32	66.27	63.68
250	SWRI54*	46.76	50.67	53.97	55.96	49.19	57.31	57.05	56.47	58.2	63.6	60.48	60.39	59.37	62.33	60.9	59.85	62.07	62.37	62.37	61.32	60.69	64.22	61.66	61.81	61.47	61.83	61.49	65.96	67.72	69.44	67.17	69.55	68.17	67.72	67.72	65.21	66.11	64.75	65	65.05	68.54	61.86	65.32	66.82	65.47	67.47	65.21	64.13
251	SWRI19	46.91	50.67	53.68	55.82	49.05	57.16	56.97	56.18	57.9	63.29	60.33	60.24	59.37	62.48	60.75	59.7	61.92	62.22	62.22	61.02	60.69	64.07	61.37	61.52	61.18	61.69	61.19	65.81	67.57	69.44	67.02	69.39	67.87	67.42	67.42	65.06	65.96	64.6	64.85	64.9	68.39	61.71	65.17	66.67	65.32	67.32	65.06	63.83
252	SWRI28	46.32	50.52	53.68	56.26	49.19	57.16	56.45	55.44	57.9	63.29	59.88	60.24	59.22	61.88	60.9	60.15	62.22	62.37	62.37	61.02	60.39	63.62	61.81	61.96	61.32	61.54	61.79	65.66	67.87	69.44	67.02	69.39	68.17	67.72	67.72	65.21	66.27	64.15	65.3	65.36	69.76	61.26	65.47	66.97	65.47	67.17	64.91	64.13
253	P. moraviensis DSM 16007	46.47	51.12	53.24	56.85	49.19	57.01	57.2	55.88	58.35	63.29	60.03	60.54	60.12	62.63	61.5	61.05	63.57	63.42	63.42	61.77	60.69	63.92	62.85	62.41	62.21	61.09	62.24	66.87	68.62	70.35	67.47	70.3	68.63	68.17	68.17	66.27	67.32	64.6	65.45	65.51	69.76	61.26	65.92	67.42	65.92	67.62	65.36	63.98
254	PGSB 7839	46.47	51.12	53.24	56.85	49.19	57.01	57.2	55.88	58.35	63.29	60.03	60.54	60.12	62.63	61.5	61.05	63.57	63.42	63.42	61.77	60.69	63.92	62.85	62.41	62.21	61.09	62.24	66.87	68.62	70.35	67.47	70.3	68.63	68.17	68.17	66.27	67.32	64.6	65.45	65.51	69.76	61.26	65.92	67.42	65.92	67.62	65.36	63.98
255	SWRI153*	47.35	52.01	53.38	55.82	49.05	56.87	56.9	55.44	58.2	63.14	60.63	60.24	59.52	62.93	61.2	61.2	63.42	63.12	63.12	62.22	61.43	63.77	62.41	61.96	61.62	61.24	61.94	67.02	68.62	69.44	67.17	69.85	68.17	67.72	67.72	65.96	67.02	63.84	65.3	65.36	69.91	60.66	66.22	67.27	66.22	67.32	64.91	64.28
256	SWRI185	47.06	51.71	53.24	55.67	48.76	56.57	56.6	55.15	58.05	62.99	60.33	60.09	59.37	62.63	60.9	60.9	63.12	62.82	62.82	61.92	61.14	63.47	62.11	61.66	61.32	60.95	61.64	66.72	68.32	69.14	66.87	69.55	67.87	67.42	67.42	65.66	66.72	63.69	65.15	65.2	69.76	60.36	65.92	66.97	66.07	67.02	64.61	63.98
257	SWRI162	47.21	52.01	53.53	55.96	48.76	56.57	56.9	55.44	58.05	62.99	60.33	59.94	59.22	62.63	60.9	61.2	63.12	62.82	62.82	61.92	61.14	63.47	62.11	61.66	61.32	60.95	61.64	66.72	68.32	69.14	66.87	69.55	67.87	67.42	67.42	65.66	66.72	63.69	65.15	65.2	69.91	60.51	65.92	66.97	66.22	67.02	64.91	63.98
258	SWRI99*	47.21	51.57	54.12	57.29	49.27	57.38	57.56	56.47	58.35	62.99	60.18	60.54	59.97	62.33	60.9	60.3	62.67	62.67	62.67	61.47	60.09	63.47	62.11	61.66	61.76	60.95	61.94	66.72	68.37	70.09	67.52	70.05	69.28	68.52	68.52	65.51	66.57	63.39	65.3	65.36	70.27	61.45	66.22	68.17	66.21	67.07	64.96	64.71
259	SWRI111*	46.91	51.57	53.53	57	49.05	57.16	57.2	56.03	58.05	62.69	60.33	60.69	59.52	62.33	60.75	60	62.67	62.37	62.37	61.02	60.09	63.17	61.81	61.37	61.47	60.5	61.64	66.41	68.17	69.59	67.17	69.85	68.63	68.17	68.17	65.66	66.72	63.69	65	65.05	70.12	61.14	66.37	67.72	66.06	67.37	64.95	64.56
260	SWRI113	47.06	51.42	53.53	57.29	49.19	57.31	57.5	56.18	58.05	62.84	60.48	60.69	59.67	62.33	60.6	59.85	62.82	62.52	62.52	61.02	59.94	63.17	61.96	61.52	61.62	60.65	61.49	66.26	68.32	70.05	67.32	70	69.08	68.33	68.33	65.66	66.72	63.54	65	65.05	70.12	61.3	66.12	67.92	65.66	67.22	65.11	64.32
261	SWRI65*	47.21	51.12	53.82	57.14	49.05	57.01	57.35	56.03	58.05	62.84	60.18	59.94	59.52	62.18	60.45	60	62.52	62.52	62.52	60.72	60.09	63.17	61.96	61.52	61.03	60.5	61.19	66.26	68.32	69.44	67.32	69.7	68.78	68.02	68.02	65.51	66.57	63.39	64.85	64.9	69.82	61.6	66.37	68.17	66.06	67.07	64.95	64.56
262	SWRI200	47.35	51.57	53.38	57	49.05	57.61	57.5	56.03	58.2	62.99	60.63	60.39	59.82	62.63	60.45	60	62.97	62.67	62.67	61.17	60.09	63.47	62.11	61.66	61.47	60.5	61.64	66.41	68.47	69.89	67.47	69.85	68.93	68.17	68.17	65.81	66.87	63.69	65.15	65.2	69.97	61.6	66.42	68.07	65.81	67.22	65.11	64.47
263	SWRI81*	47.35	51.87	54.56	57.14	49.42	57.68	57.86	56.47	58.79	63.14	60.33	60.39	59.82	62.93	60.9	60.6	62.82	62.52	62.82	61.77	60.39	63.47	62.41	62.11	61.62	60.8	62.54	67.17	68.52	69.79	67.98	69.89	69.13	68.67	68.67	65.96	67.02	64.3	65.45	65.51	70.43	61.6	66.52	68.33	66.67	67.22	65.11	65.17
264	SWRI33	47.79	51.72	54.56	57.14	49.12	57.53	57.56	56.76	58.35	63.75	60.93	60.39	60.27	62.63	61.05	60.6	63.27	63.12	63.42	62.07	61.14	63.92	63	62.56	61.76	61.54	62.09	66.87	68.97	69.94	68.13	70.2	69.43	68.67	68.67	65.66	66.72	63.69	65.3	65.36	70.58	61.75	66.87	68.98	67.02	67.37	65.86	65.07
265	P. reinekei CCUG 53116	47.21	50.07	53.38	55.08	49.19	57.61	56.52	56.32	56.72	61.93	61.68	60.39	61.17	62.48	60.15	60.45	63.27	63.12	63.12	60.87	60.99	62.87	60.77	61.52	60.44	60.95	60.75	67.47	68.02	67.62	66.57	68.94	67.72	66.67	66.37	65.06	65.81	63.69	63.03	63.09	67.78	61.11	64.42	67.42	64.71	66.11	65.21	63.98
266	P. mohnii CCUG 53115	47.5	50.82	52.94	55.23	49.05	56.57	56.97	55.15	58.2	61.18	61.68	59.94	59.52	61.88	59.85	60.15	62.82	62.52	62.52	60.57	59.04	61.08	59.14	60.48	59.12	60.36	60.45	66.41	66.97	68.23	66.57	67.88	67.42	66.06	66.06	63.4	64.61	63.99	63.03	63.09	67.78	60.21	63.83	66.37	63.21	65.81	63.86	62.78
267	P. moorei CCUG 53114	47.21	50.67	52.79	55.52	48.9	56.72	56.22	55.44	57.9	61.48	61.08	60.09	60.12	61.14	60	60.15	62.97	61.62	61.62	60.57	59.49	60.93	59.73	61.37	59.41	59.76	59.7	66.26	66.07	67.47	65.66	68.18	66.97	65.91	65.91	63.4	64.76	62.78	62.73	62.78	66.72	59.91	63.98	66.07	63.21	65.06	64.31	62.63
268	P. umsongensis LMG 21317	47.06	50.67	52.79	56.41	48.32	56.42	56.82	55.15	57.16	62.84	62.13	60.39	60.57	62.03	60.3	60.6	62.97	62.52	62.52	61.17	59.79	60.93	60.48	61.52	59.71	58.88	60.75	66.26	66.37	68.08	66.87	67.58	66.67	66.82	67.12	64.61	65.36	62.93	63.18	63.24	69	60.66	65.17	67.27	63.36	66.57	64.16	62.93
269	OE 47.1	47.06	50.22	52.94	56.7	48.46	56.72	56.67	55	57.31	62.54	61.23	61.14	60.57	61.73	59.85	60.15	62.97	62.22	62.22	61.32	60.09	60.78	60.62	61.37	59.85	59.47	61.04	66.26	66.07	67.93	66.87	67.88	66.82	66.67	66.97	64.46	65.21	62.63	63.18	63.24	68.54	60.81	65.17	67.12	63.66	65.81	64.16	62.78
270	OE 55.7	47.06	50.22	52.94	56.7	48.46	56.72	56.67	55	57.31	62.54	61.23	61.14	60.57	61.73	59.85	60.15	62.97	62.22	62.22	61.32	60.09	60.78	60.62	61.37	59.85	59.47	61.04	66.26	66.07	67.93	66.87	67.88	66.82	66.67	66.97	64.46	65.21	62.63	63.18	63.24	68.54	60.81	65.17	67.12	63.66	65.81	64.16	62.78
271	P. vancouverensis ATCC 700688	47.35	50.82	53.38	56.41	49.19	56.87	57.35	56.32	58.94	63.14	60.63	60.39	59.97	61.58	62.11	61.05	62.97	63.87	63.87	61.02	59.49	62.57	62.7	62.41	61.32	61.09	61.04	66.72	67.12	68.53	67.47	69.39	67.57	67.57	67.57	64.91	65.81	63.24	63.79	63.84	68.54	60.66	64.57	66.52	63.81	65.51	64.01	63.38
272	P. jessenii CIP 105274	47.5	50.67	52.79	56.26	49.49	56.72	57.2	55.74	58.2	62.99	61.23	60.99	60.42	62.03	61.5	61.35	63.27	63.12	63.12	62.22	60.84	63.47	61.37	62.41	62.06	60.65	61.79	67.78	68.47	68.53	67.32	69.09	66.97	66.21	66.52	65.21	66.57	63.24	63.79	63.84	67.78	61.11	64.57	66.67	62.91	66.11	64.16	63.23
273	PGSB 8162	47.21	50.67	52.79	56.11	49.49	56.72	57.35	55.74	57.9	62.84	61.53	60.99	60.12	61.73	61.5	61.05	62.97	62.82	62.82	61.92	60.69	63.17	61.07	62.41	61.76	60.65	61.94	67.47	68.32	68.68	67.17	69.09	66.82	66.06	66.37	65.06	66.42	63.24	63.48	63.54	67.93	60.96	64.42	66.52	62.91	66.27	64.31	63.38
274	P. laurylsulfatiphila AP3 16	47.35	50.52	52.79	56.26	49.63	56.72	56.15	55.44	58.49	61.93	60.48	61.14	59.97	61.14	61.5	61.05	63.27	63.27	63.27	61.47	59.64	62.72	61.07	61.96	60.29	59.91	61.49	67.17	67.57	68.99	66.87	68.48	66.82	66.37	66.37	65.21	65.81	62.63	63.03	63.09	68.24	61.11	64.28	66.82	63.51	65.96	63.86	63.38
275	P. laurylsulfatovorans AP3 22	47.35	50.52	52.79	56.26	49.63	56.72	56.15	55.44	58.49	61.93	60.48	61.14	59.97	61.14	61.5	61.05	63.27	63.27	63.27	61.47	59.64	62.72	61.07	61.96	60.29	59.91	61.49	67.17	67.57	68.99	66.87	68.48	66.82	66.37	66.37	65.21	65.81	62.63	63.03	63.09	68.24	61.11	64.28	66.82	63.51	65.96	63.86	63.38
276	P. endophytica BSTT44	45.29	48.81	52.43	55.16	50.29	58.12	56.51	55	54.8	60.27	60.48	60.09	58.77	62.63	58.95	58.5	60.12	59.82	59.82	58.62	59.04	60.33	60.33	59.73	57.21	57.69	58.81	64.3	63.27	65.26	63.9	64.75	63.55	63.25	63.25	61.75	62.65	63.68	64.38	64.59	67.17	59.46	60.84	62.61	62.16	63.87	62.22	60.99
277	P. helleri DSM 29165	45.29	50	52.14	56.19	49.42	57.53	55.61	57.06	55.98	61.63	61.53	60.24	59.97	61.14	60.15	60.6	61.02	61.17	61.17	60.12	60.84	61.23	61.07	61.07	59.71	58.88	59.55	65.66	66.27	66.77	65.41	66.26	65.51	64.76	64.76	63.1	64.16	63.83	65.3	65.5	67.17	60.66	63.53	64.11	62.91	65.67	63.27	61.88
278	P. lundensis ATCC 49968	45.15	48.58	54.26	57.58	49.12	57.53	57.71	54.85	57.46	62.54	61.08	60.39	60.72	61.73	58.65	59.25	61.02	61.17	61.17	60.72	59.79	60.93	61.66	61.37	58.68	60.06	60.75	66.26	65.67	66.31	65.86	67.78	65.51	65.21	64.91	62.95	63.86	64.15	63.64	63.69	67.63	61.26	62.63	65.17	62.76	64.62	64.77	62.33
279	P. weihenstephanensis DSM 29166	46.32	49.03	53.97	57.58	49.12	57.91	56.36	55.15	57.46	61.33	61.68	59.49	60.42	59.79	59.4	58.8	61.02	60.57	60.57	59.37	59.64	60.03	60.03	59.73	57.79	59.62	60.45	65.81	65.07	66.31	65.41	67.02	65.66	65.36	65.06	62.2	63.1	63.24	64.39	64.45	66.57	59.91	62.18	65.02	62.31	63.87	64.02	61.29
280	P. fragi CECT 446	46.76	49.33	54.26	57	48.54	58.36	56.36	56.47	57.9	62.69	62.57	61.3	61.17	61.29	59.25	59.55	61.62	61.02	61.02	61.02	60.69	61.68	60.62	60.92	58.82	59.91	61.49	67.17	67.17	66.92	66.92	67.62	66.72	66.27	65.96	63.1	64.16	63.54	64.55	64.6	67.93	61.11	64.13	66.82	63.66	65.82	64.17	63.23
281	P. taetrolens LMG 2336	46.32	49.33	54.56	56.55	48.39	58.42	56.96	56.24	58.05	61.9	61.68	61.45	61.47	61.73	59.82	59.52	60.84	61.29	61.29	62.07	61.14	61.53	61.52	61.22	58.68	58.88	60.9	67.62	66.42	67.07	66.62	68.53	66.87	66.57	66.27	63.86	64.61	63.24	64.7	64.75	67.73	60.93	63.28	65.42	63.77	64.72	64.42	62.74
282	P. versuta L10.10	46.62	48.44	53.68	56.41	48.83	57.76	56.96	55.15	57.16	62.54	60.78	59.49	61.62	60.84	59.25	58.8	60.42	60.87	60.87	60.72	58.74	60.93	60.33	60.18	58.09	58.88	61.19	65.36	66.27	67.22	67.52	66.87	66.11	65.81	65.81	62.8	63.25	63.99	63.79	63.84	66.72	59.61	62.78	64.26	63.36	64.77	64.02	62.33
283	P. deceptionensis CECT 7677	46.32	48.73	54.56	55.96	48.39	58.06	56.21	56.32	57.31	62.24	62.13	60.54	60.72	61.29	59.7	59.4	61.32	61.02	61.02	60.72	59.49	61.53	60.77	60.48	58.53	60.21	61.49	66.41	66.27	66.31	66.16	67.02	66.27	65.51	65.36	62.05	62.95	64.3	64.7	64.75	66.72	60.36	62.93	65.17	63.96	65.52	64.47	62.48
284	P. psychrophila DSM 17535	46.18	48.73	54.26	56.11	48.39	58.36	56.66	56.18	57.75	63.6	62.28	60.84	61.62	61.43	60.15	59.55	61.62	61.77	61.47	61.47	59.79	61.68	61.66	61.07	59.41	60.65	61.19	66.57	66.42	66.92	66.47	67.93	66.72	65.96	65.81	62.35	63.25	63.84	65.45	65.51	67.17	61.26	63.38	65.17	64.11	65.52	64.47	62.63
285	P. lutea LMG 21974	45.28	47.54	53.89	54.11	49.2	55.64	56.56	55.36	57.31	61.27	61.98	59.13	60.51	60.86	59.67	58.92	60	60	60.3	60.96	60.18	59.82	59.73	60.92	59.82	59.91	58.36	66.06	65.92	65.61	67.42	66.82	64.71	65.02	65.17	62.31	63.06	63.05	64.1	64.16	67.84	60.54	64.52	65.41	66.02	65.77	65.77	64.82
286	P. graminis LMG 21661	45.44	49.78	54.32	56.74	48.61	57.72	58.05	56.53	58.35	62.8	61.94	60.45	59.13	61.46	60.63	60.33	61.34	62.39	62.24	61.68	61.34	59.85	60.59	61.63	60.7	60.77	59.52	67.72	67.41	67.12	67.72	68.33	66.37	66.82	66.97	65.02	65.77	62.9	64.56	64.61	69.36	60.84	65.42	67.82	68.12	68.17	67.12	65.42
287	P. abietaniphila ATCC 700689	46.84	50.15	53.5	54.31	47.53	56.72	56.23	55.26	56.91	61.17	59.73	60.03	59.76	59.56	59.02	58.27	59.14	60.33	60.18	59.46	59.14	59.58	57.96	60.03	59.56	59.32	58.67	66.82	66.92	67.37	67.82	67.97	66.17	65.87	66.02	63.53	64.57	64.41	65.47	65.67	67.07	60.42	64.68	66.02	66.32	67.41	65.02	64.83
288	P. bohemica IA19	46.47	50.52	53.73	54.84	49.64	53.86	56.33	54.63	56.87	60.09	58.96	60.15	59.58	59.82	58.68	58.23	57.61	59.7	59.4	59.43	58.06	57.46	57.93	58.81	58.21	57.52	56.85	65.16	65.47	65.61	65.31	65.91	65.32	65.17	65.02	61.56	62.91	62.9	63.65	63.7	66.31	60.99	63.32	64.96	64.06	65.92	64.41	62.57
289	P. caspiana FBF102	44.79	50.37	53	56.45	47.52	55.93	55.37	55.43	56.19	62.11	61.64	60.81	59.64	60.86	60.33	58.98	59.25	60.3	60.6	59.79	61.85	60.06	60.06	60.36	60.03	58.76	58.99	65.16	65.92	65.96	66.57	66.52	65.02	64.56	65.02	62.76	64.26	62.5	65.46	65.51	68.84	60.66	63.38	64.71	64.71	65.07	65.82	64.87
290	P. cichorii ATCC 10857	45.67	47.99	52.12	55.28	49.13	54.45	57.3	54.99	57.23	61.95	59.7	59.31	58.74	61.16	59.13	58.68	60.6	61.49	61.49	59.04	59.46	60.95	60.06	61.09	60.03	58.91	60.48	64.86	65.17	66.42	65.81	66.52	65.62	66.22	66.07	63.66	64.41	63.7	63.8	64.01	67.78	61.11	62.78	65.02	64.56	65.52	63.87	64.42
291	P. asturiensis LMG 26898	45.96	48.29	52.12	55.72	47.67	54.6	55.66	55.57	57.08	62.86	60.3	59.01	59.94	61.46	60.78	60.63	61.34	62.09	61.79	60.99	59.17	62	61.09	61.98	61.2	59.94	60.77	66.21	65.92	67.17	67.32	66.97	65.92	65.92	66.07	64.41	65.02	64.31	66.37	66.57	67.48	60.06	63.68	64.56	65.32	65.37	65.37	64.13
292	P. floridensis GEV388	47.14	48.58	52.27	55.87	48.69	55.49	56.86	54.84	57.82	61.8	61.94	58.86	60.24	61.61	59.13	59.58	61.34	61.49	61.79	60.39	60.36	61.1	59.91	61.09	60.91	60.24	62.26	67.57	68.01	67.92	68.22	67.72	67.57	67.42	67.57	65.92	67.12	63.7	65.76	65.81	67.33	60.66	64.13	66.37	64.41	66.87	65.67	65.62
293	P. viridiflava ATCC 13223	46.84	48.58	52.71	56.3	48.69	54.9	56.56	55.28	56.49	62.86	62.09	60.06	59.19	61.61	61.08	60.18	61.04	61.79	62.09	60.09	60.8	61.4	60.95	62.43	60.76	58.62	60.62	65.91	66.82	67.32	68.07	66.97	67.12	66.67	66.82	65.32	66.52	62.95	65.16	65.21	68.84	60.36	64.28	65.32	64.86	65.67	66.12	63.98
294	P. avellanae CIP 105176	45.81	48.29	52.27	54.99	47.23	55.19	56.71	55.87	56.05	62.26	60.6	58.86	59.49	60.27	60.78	60.03	60.3	61.64	61.64	60.84	60.66	61.55	60.65	61.39	60.18	59.65	60.18	67.87	67.26	68.22	68.22	67.87	67.27	66.97	67.42	65.62	66.97	63.25	65.16	65.21	68.39	60.66	63.98	65.17	64.56	66.57	66.27	65.02
295	P. cannabina LMG 5096	45.23	47.84	52.56	55.13	48.54	55.19	57.3	55.72	55.6	60.75	61.19	58.41	59.49	59.23	60.48	59.28	59.4	60.45	60.6	58.74	58.27	60.06	59.91	60.8	59.3	59.2	60.33	65.46	65.32	65.51	66.11	65.46	65.02	64.86	65.32	62.91	63.51	63.84	65	65.05	67.02	60.06	61.73	64.26	62.16	64.02	62.97	64.13
296	P. coronafaciens LMG 5060	46.55	50.07	51.98	55.72	48.69	55.04	57.6	55.72	55.6	62.26	61.34	59.61	59.64	61.46	60.63	59.43	60.3	62.24	62.09	60.54	59.91	61.4	60.65	61.39	59.3	58.91	60.77	66.37	64.87	67.02	66.42	66.97	65.62	65.17	65.32	64.26	65.02	62.63	65.15	65.2	68.09	59.91	62.93	64.86	64.71	65.37	64.92	64.13
297	P. congelans LMG 21466	46.55	49.63	53.44	55.13	47.96	56.08	56.71	56.01	56.34	62.86	61.34	60.36	59.64	60.86	60.63	59.28	60.75	62.09	62.39	59.94	60.66	61.1	60.5	61.09	60.18	59.35	61.66	67.12	66.97	67.92	67.02	67.57	66.37	66.22	66.67	65.32	66.37	63.1	65.01	65.06	69.6	61.11	63.23	65.47	65.77	66.57	65.52	65.17
298	P. cerasi LMG 28609	46.4	49.78	53.73	54.69	47.67	56.08	57	56.74	56.64	62.86	61.64	59.76	59.79	60.86	61.38	59.73	61.04	62.24	62.84	60.69	60.66	61.25	61.39	61.54	60.47	59.5	62.26	67.27	67.26	68.22	67.92	67.42	67.12	66.97	67.42	66.07	66.82	63.4	65.46	65.21	69.3	61.26	63.68	66.07	65.92	66.87	66.27	65.32
299	P. syringae pv. syringae NCPPB 281	46.55	50.07	53.59	54.69	47.96	56.08	56.71	56.3	56.05	62.41	62.24	60.51	60.54	61.16	61.53	59.88	61.49	62.99	63.28	60.54	60.36	61.4	60.95	61.39	60.03	59.79	61.96	67.12	66.82	68.22	67.47	67.27	67.12	67.12	67.57	65.62	66.67	63.1	65.61	65.66	70.06	61.41	63.53	66.07	66.37	66.72	65.82	65.17
300	P. caricapapayae LMG 2152	47.14	50.22	53.15	55.57	48.83	55.34	57	56.3	56.78	63.01	60.6	59.76	60.24	60.42	60.78	60.03	60.6	61.04	61.34	60.24	59.61	61.7	60.8	61.54	59.44	59.65	61.07	66.21	65.77	67.17	66.42	66.37	66.07	66.07	66.22	64.56	65.62	63.86	65.46	65.51	69	61.11	63.08	64.11	64.41	64.77	65.22	63.98
301	P. ficuserectae CCUG 32779	47.28	49.48	53.15	54.84	48.4	55.34	56.56	56.45	56.19	62.41	61.34	58.86	60.09	60.42	60.48	59.73	60.75	61.19	61.49	59.94	59.61	61.1	60.21	60.95	59.15	59.35	60.92	66.52	65.47	67.17	67.32	66.82	65.77	65.92	66.37	64.26	65.32	62.8	65.01	65.06	68.69	60.66	63.08	64.26	64.41	65.37	65.22	64.57
302	P. meliae ICMP 6289	47.14	49.63	53	54.99	48.4	55.49	56.56	56.3	56.19	62.41	61.49	59.01	60.39	60.71	60.48	59.73	60.75	61.19	61.49	60.09	59.76	61.1	60.36	60.95	59.3	59.35	60.92	66.82	65.62	67.47	67.47	66.97	66.07	66.22	66.67	64.41	65.47	62.8	65.01	65.06	68.69	60.66	63.23	64.26	64.56	65.52	65.37	64.42
303	P. amygdali LMG 13184	47.14	49.63	53	55.28	48.54	55.19	56.86	56.6	56.05	62.41	61.19	58.86	60.54	60.42	60.63	59.88	60.9	61.34	61.64	60.09	59.61	61.4	60.65	61.24	59.3	59.35	60.92	66.82	65.47	67.32	67.47	66.82	66.07	66.22	66.67	64.41	65.32	62.8	65.01	65.06	68.54	60.66	63.08	64.26	64.41	65.52	65.37	64.42
304	P. savastanoi LMG 2209	47.14	49.78	53.15	55.28	48.54	55.19	56.86	56.45	55.9	62.11	61.04	58.56	60.24	60.57	60.48	59.73	60.75	61.19	61.49	59.94	59.61	61.25	60.36	60.95	59.15	59.06	60.77	66.67	65.17	67.02	67.17	66.52	65.77	65.92	66.37	64.11	65.17	62.8	64.71	64.76	68.39	60.36	62.78	64.11	64.11	65.37	65.22	64.28
305	P. tremae LMG 22121	46.99	49.63	52.86	54.99	48.25	55.19	56.56	56.45	55.9	62.11	61.04	58.71	60.39	60.42	60.48	59.73	60.75	61.19	61.49	59.79	59.61	61.1	60.36	60.95	59.15	59.06	60.62	66.67	65.32	67.17	67.32	66.67	65.92	66.07	66.52	64.26	65.32	62.65	64.86	64.91	68.39	60.36	62.93	64.11	64.26	65.37	65.22	64.28
306	P. mucidolens LMG 2223	45.24	49.55	52.71	55.57	47.38	56.99	56.95	55.34	57.5	61.35	62.39	61.11	61.88	62.5	60.48	60.78	62.09	62.39	62.39	60.84	61.85	61.7	60.65	61.24	60.76	60.68	60.92	67.62	67.66	67.27	68.02	68.33	66.62	66.62	66.62	65.71	66.42	63.55	63.39	63.25	67.93	60.84	64.73	65.47	65.77	66.87	65.67	64.43
307	P. yamanorum LMG 27247	46.41	48.81	51.98	56.6	48.69	57.14	58.15	54.76	56.91	60.15	59.61	60.42	62.39	61.01	58.98	60.03	60.9	61.94	61.64	60	60.57	60.36	60.36	60.95	59.74	59.35	59.58	67.77	66.92	68.33	66.67	66.52	66.92	66.77	66.47	64.62	65.52	62.65	62.9	62.95	67.78	61.14	63.84	65.47	64.72	66.57	65.07	63.69
308	P. brennerii DSM 15294	45.97	47.92	53.29	56.45	47.96	56.99	58.74	55.93	56.62	60.75	60.8	61.17	62.09	61.46	59.43	60.18	61.79	61.34	61.64	61.04	60.86	61.55	60.21	61.69	60.76	60.09	59.44	67.92	68.41	68.33	67.27	68.02	67.97	67.22	66.92	64.92	65.97	63.25	63.05	63.1	68.08	61.14	64.73	67.41	64.87	67.02	66.57	64.88
309	P. gessardii CIP 105469	45.53	48.22	54.03	57.04	48.25	56.7	57.85	55.93	56.47	60.6	60.21	60.27	61.94	60.12	59.73	60.18	61.49	61.19	61.19	60.3	60.57	60.8	60.06	61.39	60.18	59.79	58.69	67.77	67.96	68.33	66.37	67.72	66.92	66.17	66.17	64.17	65.07	63.25	62.29	62.35	68.38	61.43	64.58	66.82	65.32	67.02	66.12	64.43
310	SWRI52*	45.97	47.48	53	57.04	48.54	56.85	57.55	55.34	56.47	60	59.76	59.52	60.9	59.52	58.68	59.58	61.19	61.19	61.19	59.7	61.31	60.36	59.62	60.36	59.59	59.35	58.4	67.77	67.07	67.72	66.21	67.12	66.32	66.02	65.71	63.87	64.92	63.55	62.29	62.35	67.78	60.99	63.39	66.67	64.72	66.72	65.37	64.43
311	P. proteolytica CIP 108464	46.56	48.81	53.29	56.3	48.1	56.4	57.4	55.78	56.18	60.6	60.8	60.72	61.49	60.71	59.73	59.73	61.04	61.19	61.19	60.75	60.71	60.66	59.91	61.09	59.88	59.35	58.69	67.62	67.66	67.72	66.52	67.42	66.77	66.32	66.02	64.17	65.37	63.25	62.14	62.2	67.93	60.84	64.29	66.22	64.42	66.72	65.97	63.99
312	SWRI141	46.71	48.96	53.59	56.3	47.81	56.85	57.55	56.08	56.62	60.75	60.95	60.72	62.09	61.01	59.73	60.03	61.49	61.64	61.64	60.9	60.86	61.1	60.36	61.24	60.03	59.5	58.99	67.77	68.11	67.72	66.52	67.42	66.77	66.32	66.02	64.17	65.22	63.4	62.14	62.2	68.38	60.99	64.58	66.37	65.02	66.57	65.82	64.29
313	SWRI142	46.71	48.96	53.59	56.3	47.81	56.85	57.55	56.08	56.62	60.75	60.95	60.72	62.09	61.01	59.73	60.03	61.49	61.64	61.64	60.9	60.86	61.1	60.36	61.24	60.03	59.5	58.99	67.77	68.11	67.72	66.52	67.42	66.77	66.32	66.02	64.17	65.22	63.4	62.14	62.2	68.38	60.99	64.58	66.37	65.02	66.57	65.82	64.29
314	SWRI104*	46.71	48.81	53.73	56.16	48.1	56.85	57.85	56.08	56.32	60.6	60.8	60.57	61.79	60.86	59.73	59.88	61.19	61.34	61.34	61.04	60.71	60.95	60.06	60.95	59.74	59.35	58.99	67.77	67.81	67.87	66.67	67.57	66.92	66.47	66.17	64.17	65.22	63.55	62.29	62.35	68.38	60.99	64.14	66.37	64.87	66.87	66.12	63.99
315	P. costantinii LMG 22119	45.68	48.66	53	56.16	47.52	56.99	56.8	55.05	57.06	61.65	61.1	59.37	61.04	60.27	59.13	60.48	60.6	60.3	60.6	59.4	59.52	60.8	60.5	60.21	59.88	59.2	61.07	67.02	67.81	66.21	66.82	67.42	65.41	65.41	65.56	64.62	65.82	63.1	64.86	64.91	67.62	61.73	63.39	65.32	63.68	67.02	64.77	63.54
316	SWRI22*	46.77	49.63	53.81	55.95	47.74	57.89	57.47	55.57	58.03	62.8	63.28	62.91	63.38	62.89	59.97	60.57	62.63	62.18	62.78	62.03	62	62.09	61.48	61.48	61.29	61.5	62.8	68.78	68.97	68.73	68.73	69.64	68.83	68.22	68.22	66.22	67.27	63.35	65.26	65.31	69.55	62.43	65.13	67.22	65.27	68.17	65.77	64.98
317	P. lactis DSM 29167	46.19	49.63	53.81	56.24	47.88	58.04	57.92	55.28	57.73	62.95	62.69	62.91	62.63	62.89	59.52	59.97	62.33	61.58	62.18	61.58	61.55	62.09	61.33	61.33	61	61.36	62.2	68.78	68.82	68.13	68.13	69.03	68.37	67.62	67.62	65.92	66.82	63.05	65.71	65.46	69.09	61.83	64.83	67.22	64.67	67.42	64.86	64.68
318	SWRI126*	46.48	49.93	53.81	56.39	47.88	57.74	57.62	55.43	57.88	63.1	62.69	62.91	62.78	63.19	59.82	60.27	62.48	61.88	62.48	62.18	61.7	62.69	61.78	61.48	61.44	61.5	62.35	68.63	68.67	68.28	68.43	69.18	68.98	67.92	67.92	65.92	67.12	63.05	65.71	65.76	69.09	61.83	64.53	67.37	64.52	67.57	65.17	64.53
319	P. fluorescens ATCC 13525	47	49.11	53.73	55.43	47.08	56.99	58.22	54.9	57.79	62.86	62.15	61.47	63.13	62.5	60.48	60.33	61.64	61.49	62.09	61.04	60.27	62.15	61.69	61.24	60.61	59.79	61.52	68.37	68.41	67.72	68.33	68.78	67.52	67.37	67.67	65.82	67.17	64.16	64.71	64.76	68.84	62.03	64.73	65.92	65.47	66.57	65.37	64.43
320	P. antarctica LMG 22709	45.83	49.26	53.59	55.72	47.81	57.44	58.07	54.76	56.76	61.95	62.3	62.22	62.24	61.31	58.68	59.58	60.6	60	60.6	60.45	60.27	61.25	60.65	61.39	59.74	58.91	60.77	67.32	67.81	66.97	66.97	67.27	66.77	66.02	66.32	64.77	65.97	63.7	64.4	64.46	68.68	60.99	62.65	64.87	63.83	66.42	64.77	62.95
321	P. haemolytica DSM 108988	46.71	48.52	53.59	55.72	46.94	56.55	57.47	53.73	57.06	60.9	60.66	60.87	61.64	61.61	58.83	59.73	61.19	60.75	61.34	60.3	60.57	61.1	61.24	60.8	59.59	58.76	60.77	67.77	67.96	68.02	67.12	67.27	66.92	66.77	66.77	65.37	66.27	63.25	64.4	64.46	67.62	60.84	63.54	65.92	63.68	65.67	64.17	64.29
322	P. libanensis CIP 105460	46.85	48.66	54.47	55.57	47.38	56.99	57.4	55.2	57.79	62.41	62.44	61.77	62.24	61.46	59.73	59.88	62.39	62.24	62.54	61.04	61.31	62.89	61.09	61.09	60.91	59.65	61.66	67.92	68.56	67.87	67.87	68.17	67.52	67.37	67.67	65.97	67.02	63.25	65.16	65.21	68.84	61.88	64.43	66.07	65.32	66.72	64.92	64.29
323	P. synxantha ATCC 9890	46.41	48.81	54.47	55.72	46.79	57.14	58.15	54.9	57.65	63.01	62.59	61.32	62.39	61.46	59.58	59.73	61.79	61.34	61.94	61.19	61.31	62.3	61.54	61.69	61.05	59.65	61.96	68.07	68.71	68.63	67.87	68.48	67.67	67.37	67.67	66.12	66.87	63.4	64.86	64.91	68.68	61.43	64.43	65.47	65.32	67.32	65.22	64.43
324	P. lurida DSM 15835	47.58	50.59	53.44	55.87	47.08	57.29	58.22	54.9	58.68	61.8	62.3	62.37	61.64	62.65	60.18	61.38	62.09	61.04	61.64	60.9	61.61	61.55	60.95	61.54	61.05	59.35	62.11	68.22	67.96	67.72	67.57	68.33	68.42	67.82	68.12	66.42	67.62	64.16	64.86	65.06	67.78	61.29	65.03	66.22	64.57	66.12	65.37	64.58
325	PGSB 8273*	47.44	50.59	53.59	56.01	47.23	57.14	58.37	55.05	58.53	61.65	62.15	62.52	61.49	62.5	60.33	61.23	61.94	60.9	61.49	60.75	61.46	61.4	60.8	61.39	61.2	59.5	61.96	68.07	67.81	67.87	67.42	68.48	68.57	67.97	68.27	66.27	67.47	64.01	64.71	64.91	67.93	61.14	64.88	66.07	64.42	65.97	65.22	64.43
326	PGSB 7828*	47.73	50.59	53.59	55.87	47.23	57.59	58.37	54.9	58.82	61.95	62.15	62.52	61.94	62.95	60.33	61.23	62.24	61.19	61.79	61.04	61.76	61.7	61.09	61.69	61.2	59.5	62.26	68.37	68.11	68.02	67.72	68.63	68.57	67.82	68.12	66.42	67.62	63.86	64.56	64.76	68.08	61.58	65.48	66.37	64.87	66.42	65.67	64.88
327	PGSB 7861	47.58	50.45	53.44	55.72	47.08	57.44	58.22	54.76	58.68	61.8	62	62.37	61.79	62.8	60.18	61.08	62.09	61.04	61.64	60.9	61.61	61.55	60.95	61.54	61.05	59.35	62.11	68.22	67.96	67.87	67.57	68.48	68.42	67.67	67.97	66.27	67.47	63.7	64.4	64.61	67.93	61.43	65.33	66.22	64.72	66.27	65.52	64.73
328	PGSB 3962*	47.73	50.59	53.59	55.72	46.79	57.44	58.37	54.76	58.53	61.8	62.44	62.67	61.79	62.8	60.33	61.23	62.24	61.19	61.79	61.19	61.61	61.7	61.09	61.69	61.2	59.5	62.26	68.37	68.11	67.87	67.72	68.48	68.57	67.97	68.27	66.42	67.62	64.01	64.56	64.76	67.93	61.43	65.18	66.07	64.72	66.27	65.52	64.73
329	P. canadensis 2-92	48.25	49.04	52.78	55.78	48.62	56.46	58.43	55.85	58.15	60.96	62.05	61.83	61.85	60.92	59.19	60.69	61.7	61.1	61.7	60.06	59.58	60.27	60.27	60.12	59.5	57.94	60.39	66.92	66.37	66.27	66.42	67.02	66.97	66.07	66.37	64.22	65.42	63.61	63.7	63.76	65.56	59.85	63.6	64.78	63.88	66.32	65.72	63.45
330	SWRI187	47.73	49.26	53	55.87	48.1	56.7	57.62	56.22	58.38	61.05	61.7	61.62	62.09	60.86	59.13	60.93	61.49	60.9	61.49	60	60.71	60.8	60.36	60.21	60.18	58.17	60.48	67.77	67.37	66.97	67.12	67.72	67.52	66.62	66.92	65.07	66.27	63.7	63.65	63.7	66.26	59.94	64.29	65.62	63.98	66.27	65.37	64.14
331	SWRI86	47.58	50	54.17	56.16	48.1	56.4	57.25	56.95	59.26	62.86	62.59	61.32	61.34	62.35	60.48	60.78	61.94	60.9	61.19	61.04	62.2	62.3	60.65	61.83	61.35	60.24	61.52	68.52	69.16	68.33	68.17	68.78	68.12	67.22	67.22	66.12	67.77	64.76	64.71	64.76	68.23	61.43	64.43	65.77	64.57	65.82	65.37	64.29
332	SWRI172	47.58	50	54.17	56.16	48.1	56.4	57.25	56.95	59.26	62.86	62.59	61.32	61.34	62.35	60.48	60.78	61.94	60.9	61.19	61.04	62.2	62.3	60.65	61.83	61.35	60.24	61.52	68.52	69.16	68.33	68.17	68.78	68.12	67.22	67.22	66.12	67.77	64.76	64.71	64.76	68.23	61.43	64.43	65.77	64.57	65.82	65.37	64.29
333	SWRI188	47.58	50	54.17	56.16	48.1	56.4	57.25	56.95	59.26	62.86	62.59	61.32	61.34	62.35	60.48	60.78	61.94	60.9	61.19	61.04	62.2	62.3	60.65	61.83	61.35	60.24	61.52	68.52	69.16	68.33	68.17	68.78	68.12	67.22	67.22	66.12	67.77	64.76	64.71	64.76	68.23	61.43	64.43	65.77	64.57	65.82	65.37	64.29
334	SWRI18*	47.58	50	54.17	56.16	48.1	56.4	57.25	56.95	59.26	62.86	62.59	61.32	61.34	62.35	60.48	60.78	61.94	60.9	61.19	61.04	62.2	62.3	60.65	61.83	61.35	60.24	61.52	68.52	69.16	68.33	68.17	68.78	68.12	67.22	67.22	66.12	67.77	64.76	64.71	64.76	68.23	61.43	64.43	65.77	64.57	65.82	65.37	64.29
335	P. cedrina subsp. cedrina DSM 17516	47.29	49.7	54.03	56.01	48.54	56.55	57.4	56.95	58.82	62.26	62.44	61.32	61.34	62.05	60.48	60.78	62.09	61.04	61.34	61.19	62.8	62.59	60.8	61.98	61.49	60.53	61.52	68.67	69.31	68.48	68.17	69.08	68.12	67.22	67.22	66.42	68.07	64.91	64.86	64.91	68.68	61.88	65.03	66.07	65.02	65.97	65.67	64.58
336	SWRI103*	47.14	49.11	54.03	56.3	48.1	56.55	57.85	56.95	58.68	62.26	61.7	60.57	61.64	62.05	59.88	60.93	61.64	60.6	60.9	61.04	62.2	62.3	61.09	61.98	61.35	60.38	61.96	68.83	69.61	68.63	68.17	69.38	68.12	67.22	67.22	66.57	67.92	64.31	65.01	65.06	68.68	61.29	64.58	66.07	64.87	65.67	65.67	64.73
337	P. cedrina subsp. fulgida DSM 14938	47.29	49.26	53.88	55.72	47.52	56.4	57.25	56.81	58.97	62.71	61.7	61.47	61.79	62.8	60.33	61.38	62.39	61.34	61.64	61.04	62.65	62.74	61.09	62.13	61.79	60.68	62.56	68.52	69.31	68.78	69.08	69.38	68.72	67.97	68.12	66.57	67.77	65.06	65.46	65.51	68.68	61.73	65.33	66.97	65.32	66.57	66.12	65.48
338	SWRI145*	45.97	49.26	54.47	55.28	47.67	57.44	58	56.37	57.94	61.65	61.4	60.42	60.9	61.01	59.13	60.03	61.34	60.15	60.75	60.3	60.12	60.8	60.36	61.24	60.32	59.06	61.07	67.32	67.66	67.57	66.82	67.72	66.47	65.86	66.47	65.22	66.27	63.86	64.56	64.61	68.08	60.84	64.14	65.17	63.68	66.27	65.52	64.14
339	SWRI195	45.97	49.26	54.47	55.28	47.67	57.44	58	56.37	57.94	61.65	61.4	60.42	60.9	61.01	59.13	60.03	61.34	60.15	60.75	60.3	60.12	60.8	60.36	61.24	60.32	59.06	61.07	67.32	67.66	67.57	66.82	67.72	66.47	65.86	66.47	65.22	66.27	63.86	64.56	64.61	68.08	60.84	64.14	65.17	63.68	66.27	65.52	64.14
340	SWRI144*	45.97	49.26	54.47	55.28	47.67	57.44	58	56.37	57.94	61.65	61.4	60.42	60.9	61.01	59.13	60.03	61.34	60.15	60.75	60.3	60.12	60.8	60.36	61.24	60.32	59.06	61.07	67.32	67.66	67.57	66.82	67.72	66.47	65.86	66.47	65.22	66.27	63.86	64.56	64.61	68.08	60.84	64.14	65.17	63.68	66.27	65.52	64.14
341	P. rhodesiae LMG 17764	47.14	49.41	53.88	55.43	47.38	57.89	58.3	54.32	56.47	60.75	60.36	60.72	61.49	61.61	58.23	58.83	61.04	60.15	60.75	60	60.12	61.55	60.5	60.5	59.88	58.76	60.18	66.72	66.62	67.12	66.21	67.57	67.22	66.62	66.92	64.62	65.52	61.45	63.5	63.7	66.87	60.84	64.14	65.17	63.83	65.82	64.32	62.65
342	P. palleroniana LMG 23076	46.92	49.18	53.37	54.77	47.3	57.82	57.49	55.28	56.85	61.99	61.34	62.56	61.38	62.15	59.97	59.82	61.14	61.73	62.33	59.88	61.34	62.03	61.57	61.13	60.65	60.12	61.85	66.82	67.37	68.58	67.67	68.43	67.97	67.37	67.67	64.26	65.47	63.2	65.11	65.16	69.15	61.62	65.22	65.67	64.77	66.62	65.41	63.58
343	P. tolaasii NCPPB 2192	46.85	49.7	53.15	55.13	47.52	57.44	58.22	56.37	57.65	61.8	63.19	62.82	62.24	62.05	60.63	60.78	61.94	62.39	62.69	60.3	60.86	63.19	61.69	62.57	61.05	59.35	61.52	67.62	68.26	68.02	67.72	67.87	67.52	66.77	67.07	65.22	66.42	63.55	64.4	64.46	68.23	60.69	65.48	65.62	64.57	65.82	64.92	63.1
344	P. salomonii LMG 22120	46.41	48.96	52.56	54.99	47.67	56.99	56.88	55.34	57.35	62.71	62.59	62.07	61.94	62.5	60.48	61.23	62.39	62.09	62.69	60.45	61.16	62.74	62.13	61.98	61.05	59.06	61.81	67.47	68.26	68.17	67.57	68.63	67.37	66.92	67.22	65.22	66.27	63.86	65.61	65.66	68.99	61.73	65.03	65.77	63.83	66.12	65.37	63.24
345	OE 28.3*	46.71	48.81	51.68	54.69	47.38	56.4	56.58	54.61	56.76	62.26	61.7	61.17	61.49	61.9	60.18	61.23	61.49	61.34	61.94	59.85	60.86	62.15	61.39	61.24	60.61	59.06	61.52	67.02	67.81	67.72	67.42	68.02	66.77	66.47	66.77	64.77	65.82	63.7	65.31	65.36	68.38	61.43	64.73	65.62	63.83	65.52	65.07	62.95
346	P. simiae Oli	46.85	49.55	53	56.16	47.08	57.14	57.17	56.08	57.79	62.86	63.04	63.42	61.79	62.2	60.48	60.93	61.94	61.64	62.24	61.79	62.05	63.49	62.13	61.54	60.76	59.35	62.11	67.92	68.86	67.87	68.33	68.93	67.97	67.52	67.82	66.12	67.17	64.31	65.46	65.66	68.53	61.14	65.77	66.22	64.87	65.82	65.67	64.43
347	SWRI177	47	49.7	52.71	55.87	46.94	57.29	57.03	55.93	57.79	62.56	63.04	63.42	61.79	62.2	60.48	60.93	61.94	61.64	62.24	61.49	62.05	63.04	62.13	61.54	60.61	59.35	62.11	67.92	68.56	67.87	68.33	68.93	67.97	67.52	67.82	65.97	67.17	64.01	65.01	65.06	68.38	61.29	65.77	66.07	64.28	65.52	65.37	64.43
348	SWRI201	47	49.7	52.71	55.87	46.94	57.29	57.03	55.93	57.79	62.56	63.04	63.42	61.79	62.2	60.48	60.93	61.94	61.64	62.24	61.49	62.05	63.04	62.13	61.54	60.61	59.35	62.11	67.92	68.56	67.87	68.33	68.93	67.97	67.52	67.82	65.97	67.17	64.01	65.01	65.06	68.38	61.29	65.77	66.07	64.28	65.52	65.37	64.43
349	SWRI128	47	49.7	52.71	55.87	46.94	57.29	57.03	55.93	57.79	62.56	63.04	63.42	61.79	62.2	60.48	60.93	61.94	61.64	62.24	61.49	62.05	63.04	62.13	61.54	60.61	59.35	62.11	67.92	68.56	67.87	68.33	68.93	67.97	67.52	67.82	65.97	67.17	64.01	65.01	65.06	68.38	61.29	65.77	66.07	64.28	65.52	65.37	64.43
350	SWRI5	47	49.7	52.71	55.87	46.94	57.29	57.03	55.93	57.79	62.56	63.04	63.42	61.79	62.2	60.48	60.93	61.94	61.64	62.24	61.49	62.05	63.04	62.13	61.54	60.61	59.35	62.11	67.92	68.56	67.87	68.33	68.93	67.97	67.52	67.82	65.97	67.17	64.01	65.01	65.06	68.38	61.29	65.77	66.07	64.28	65.52	65.37	64.43
351	SWRI83	47	49.41	52.27	55.57	46.79	56.7	56.58	55.93	57.79	62.41	62.89	63.12	61.49	62.2	60.48	60.63	61.49	61.49	62.09	61.49	62.05	63.04	61.83	61.09	60.32	59.35	62.11	68.07	68.71	67.87	68.48	69.08	68.12	67.67	67.97	65.97	67.17	63.86	64.56	64.61	68.23	61.29	65.77	65.62	64.57	65.82	65.07	64.58
352	SWRI157	46.85	49.55	52.42	55.57	46.65	56.85	57.03	55.93	57.65	62.41	62.89	62.97	61.64	62.2	60.48	60.78	61.79	61.49	62.09	61.34	61.9	62.89	61.83	61.24	60.61	59.2	61.96	67.77	68.41	67.72	68.17	68.78	67.82	67.37	67.67	65.82	67.02	63.86	64.86	64.91	68.08	61.14	65.63	65.77	64.13	65.37	65.22	64.29
353	SWRI133	47	49.7	52.71	55.57	46.94	56.99	57.03	56.22	58.09	62.56	63.04	63.42	61.94	62.5	60.78	60.93	61.94	61.94	62.54	61.79	62.35	63.34	62.13	61.39	60.61	59.65	62.41	68.22	68.86	68.17	68.63	69.23	68.27	67.82	68.12	66.27	67.47	64.31	65.16	65.21	68.53	61.43	66.07	65.92	64.57	65.82	65.37	64.73
354	SWRI175	47	49.7	52.71	55.72	46.94	57.14	57.17	56.08	57.94	62.71	63.19	63.27	61.94	62.35	60.63	61.08	62.09	61.79	62.39	61.64	62.2	63.19	61.98	61.54	60.76	59.5	62.26	68.07	68.71	68.02	68.48	69.08	68.12	67.67	67.97	66.12	67.32	64.16	65.16	65.21	68.38	61.29	65.92	66.07	64.42	65.67	65.52	64.58
355	P. aylmerense S1E40	47.29	49.85	53.59	56.16	47.23	58.18	58.37	56.52	57.65	62.71	62.3	62.52	63.43	62.2	60.18	61.23	62.84	62.24	62.84	61.34	61.46	62.15	62.13	62.13	61.05	59.5	61.66	68.67	68.71	69.08	68.48	69.38	68.72	68.42	68.72	66.87	67.92	63.25	65.61	65.66	68.99	61.73	65.77	66.67	65.17	66.72	65.22	64.58
356	P. azotoformans LMG 21611	47.44	49.26	53.15	55.43	47.23	57.14	58.37	56.37	58.09	62.26	63.93	62.52	63.43	61.76	60.63	60.78	62.24	62.09	62.69	61.64	61.16	62.3	61.83	62.28	61.2	60.09	61.96	68.07	68.26	68.02	67.72	67.57	68.12	67.97	68.27	65.67	66.72	63.86	64.25	64.46	68.23	61.58	64.43	65.92	64.42	66.72	65.67	63.99
357	P. extremorientalis LMG 19695	47	49.55	53.88	56.01	47.67	57.44	58.67	55.78	57.21	61.95	63.49	62.82	63.28	61.61	60.48	60.93	62.24	62.24	62.84	61.64	61.16	62.59	61.69	61.83	61.05	60.68	61.66	68.22	68.71	67.87	67.87	68.17	67.82	67.52	67.97	66.42	67.62	63.86	64.4	64.61	68.08	60.99	64.73	66.22	65.02	66.42	64.32	64.14
358	P. extremaustralis DSM 17835	47.58	48.81	53.29	55.28	46.94	56.85	56.2	56.22	57.65	62.41	62	61.62	62.24	62.35	60.33	60.63	61.49	61.94	62.54	60.6	61.46	61.1	60.21	60.06	60.18	60.09	61.07	67.32	67.22	66.97	67.42	67.42	67.22	66.62	67.22	64.92	66.27	63.7	64.56	64.61	68.99	61.58	65.48	66.37	64.42	65.67	65.07	62.95
359	P. paralactis DSM 29164	48.17	49.26	54.17	55.13	47.52	56.4	57.85	55.05	57.94	61.8	63.19	61.47	63.13	63.24	60.03	61.38	62.99	62.54	63.13	61.19	61.31	62.44	61.83	61.69	60.47	60.38	60.62	68.37	68.56	68.33	68.93	68.48	67.82	67.37	67.97	65.97	67.17	63.4	64.71	64.76	68.68	60.99	65.33	66.52	65.17	66.42	65.52	64.14
360	SWRI70*	47.73	49.55	54.03	55.72	47.96	56.85	57.77	55.34	57.79	61.95	63.49	61.62	62.99	63.1	60.33	61.38	62.99	62.54	63.13	61.64	61.16	62.59	61.98	61.83	60.03	60.38	60.48	68.37	68.56	68.17	68.63	68.17	67.67	67.22	67.82	65.97	67.17	63.4	64.4	64.46	68.68	61.14	65.63	66.52	65.17	66.42	65.52	63.99
361	P. poae DSM 14936	47.29	49.41	52.56	55.28	47.52	57.74	56.88	56.22	57.65	61.95	63.19	62.22	62.99	62.05	60.33	61.08	63.13	63.13	63.73	60.9	60.42	63.04	61.09	61.39	60.61	59.94	61.37	68.83	67.81	67.72	68.33	68.48	68.12	67.52	68.12	65.52	66.72	64.16	65.01	65.06	68.38	62.48	65.48	66.22	64.87	67.77	65.22	63.84
362	SWRI2*	47.44	49.55	52.56	55.28	47.38	57.74	56.88	56.22	57.65	61.95	63.19	62.22	62.99	62.2	60.18	61.08	63.43	63.43	64.03	60.9	60.42	63.04	61.39	61.69	60.91	60.09	61.37	68.98	67.96	67.57	68.17	68.33	67.97	67.37	67.97	65.67	66.87	63.86	64.86	64.91	68.53	62.48	65.92	66.37	65.32	67.62	65.22	64.14
363	P. trivialis LMG 21464	46.71	48.81	53.73	55.57	47.23	56.7	57.17	55.2	57.35	62.26	62.44	61.32	62.39	61.9	59.58	60.63	62.39	62.09	62.69	61.04	60.57	62.3	60.95	61.54	61.05	59.79	60.77	68.67	68.26	67.87	68.48	68.02	67.82	67.37	67.67	64.92	66.27	63.25	65.01	65.06	68.84	62.33	65.92	66.07	64.57	67.32	65.37	63.84
364	P. veronii LMG 17761	47.29	49.26	52.56	55.72	47.23	56.4	57.25	55.05	57.21	62.56	62.59	60.72	62.99	62.95	59.43	60.78	62.24	60.9	61.49	60.75	61.31	61.55	60.95	61.24	59.59	59.79	60.92	68.37	67.96	67.27	67.57	67.42	67.52	66.92	67.22	65.07	66.12	63.4	63.8	63.86	68.53	61.14	63.99	65.62	63.08	66.27	63.72	63.54
365	OE 51.3	47.14	48.96	52.12	55.28	47.08	56.55	57.1	55.2	57.21	62.41	62.15	60.87	62.54	62.65	58.98	60.33	61.79	60.45	61.04	60.6	61.16	61.4	60.95	60.95	59.3	59.5	60.62	68.07	67.66	67.12	66.97	67.42	67.22	66.62	66.92	64.77	65.82	62.8	63.5	63.55	68.53	60.84	63.99	65.47	63.23	65.82	63.42	63.39
366	P. orientalis DSM 17489	46.71	48.81	53.44	55.57	47.52	57.29	57.62	54.61	56.91	62.11	62.89	61.02	61.79	60.86	58.53	59.88	62.54	61.34	61.94	61.19	60.42	62.3	61.09	60.8	60.61	59.35	61.96	67.17	67.07	66.52	66.97	67.42	66.47	65.86	66.47	64.32	65.22	62.65	63.8	63.86	67.47	60.84	63.39	65.02	64.13	65.97	64.62	62.95
367	P. kairouanesis KC12	47.29	48.96	53.15	55.28	47.52	56.85	57.62	55.2	57.06	61.95	61.4	60.12	62.69	60.71	58.68	60.48	62.24	61.04	61.64	60.9	61.16	61.25	60.65	60.65	59.88	59.5	60.33	67.92	67.22	67.87	67.87	67.87	67.82	67.37	67.67	64.92	66.27	63.25	63.95	64.01	67.47	60.24	64.43	66.37	64.13	67.02	64.62	63.69
368	P. nabeulensis E10B	47.44	48.52	53.44	56.45	47.81	56.7	58.67	56.08	57.65	60.9	61.25	61.02	62.24	60.57	58.83	60.33	61.64	61.49	61.79	61.04	61.16	61.85	60.5	61.24	61.05	59.35	61.22	68.22	68.11	67.72	67.57	68.17	67.97	67.07	67.67	65.07	66.27	62.65	63.95	64.01	67.17	60.84	64.58	65.77	64.28	67.47	65.52	64.29
369	P. panacis CIP 108524	47	48.96	52.27	55.13	46.65	56.1	56.73	54.17	57.65	61.2	60.8	60.72	62.69	61.9	59.73	60.63	61.49	61.04	61.34	60.9	60.71	61.25	61.83	60.95	59	58.47	60.62	68.07	67.51	67.27	66.21	67.72	67.07	66.62	66.92	64.62	65.67	62.65	63.5	63.55	67.93	61.58	64.73	66.07	63.68	65.97	64.17	63.24
370	P. grimontii ATCC BAA-140	47.14	48.96	52.12	55.57	46.94	57.14	57.17	53.88	57.21	61.35	60.8	60.57	62.84	61.9	59.43	60.63	61.79	61.49	61.79	60.9	60.57	60.95	61.69	60.8	59.44	58.47	60.48	67.62	67.07	66.67	66.21	67.12	66.92	66.47	66.77	64.62	65.67	62.2	63.5	63.55	67.47	61.73	64.43	66.07	63.38	65.67	64.17	62.8
371	P. marginalis ATCC 10844	47.29	49.41	52.12	55.28	46.65	56.85	57.17	53.88	57.65	61.35	60.66	60.87	62.54	61.9	60.03	60.48	61.94	61.79	62.09	61.19	60.71	61.25	61.54	60.5	59.3	58.62	60.77	67.92	67.37	66.97	66.52	67.72	67.37	66.92	67.22	64.92	65.97	62.5	63.5	63.55	67.62	61.58	64.88	65.92	63.83	66.27	64.47	63.1
	* Indicates strains for which the genome was sequenced
[truncated: 323 more columns]

## Sheet: TableS4_ANIb
		1	2	3	4	5	6	7	8	9	10	11	12	13	14	15	16	17	18	19	20	21	22	23	24	25	26	27	28	29	30	31	32	33	34	35	36	37	38	39	40	41	42	43	44	45	46	47	48
1	P. caeni CECT 7778		0.710447	0.711077	0.710555	0.710718	0.709728	0.710786	0.709981	0.707028	0.708786	0.706037	0.705148	0.707661	0.70716	0.710276	0.706078	0.705769	0.704981	0.70857	0.715376	0.71388	0.70664	0.707434	0.707544	0.707405	0.707244	0.708099	0.708719	0.708488	0.705413	0.707249	0.71002	0.708339	0.709485	0.709141	0.707206	0.707342	0.712966	0.713732	0.708021	0.707671	0.709079	0.708595	0.71082	0.713316	0.711643	0.711466	0.712205
2	P. abyssi MT5	0.713829		0.975423	0.89651	0.82529	0.828103	0.789479	0.752474	0.749183	0.752765	0.753754	0.755899	0.761433	0.764392	0.756926	0.766373	0.762467	0.761251	0.763508	0.739945	0.741441	0.746523	0.749572	0.751244	0.751933	0.753044	0.75261	0.749037	0.749835	0.75086	0.748304	0.744855	0.751897	0.748943	0.748998	0.749487	0.750428	0.747698	0.747322	0.753771	0.752389	0.752239	0.751922	0.754096	0.749933	0.748862	0.749397	0.749366
3	P. gallaeciencis V113	0.710673	0.975755		0.894099	0.830354	0.824172	0.783698	0.753243	0.749121	0.753406	0.755267	0.756332	0.762694	0.764665	0.75857	0.766687	0.764474	0.7613	0.763689	0.739162	0.743115	0.746614	0.750031	0.751938	0.753431	0.753636	0.752309	0.749198	0.750632	0.75217	0.751779	0.746407	0.752795	0.749861	0.749367	0.750771	0.750732	0.748465	0.746163	0.754232	0.754065	0.753483	0.753507	0.753995	0.75316	0.751607	0.75384	0.750537
4	P. pachastrellae CCUG 46540	0.711261	0.896422	0.894483		0.821531	0.819886	0.784826	0.754579	0.749531	0.75411	0.754841	0.757121	0.764164	0.766021	0.759462	0.768263	0.766838	0.763979	0.765602	0.740774	0.743022	0.747388	0.748911	0.75215	0.752462	0.753377	0.753031	0.750017	0.751726	0.749607	0.747575	0.746836	0.750637	0.750167	0.75015	0.749606	0.750104	0.747071	0.746287	0.753894	0.753932	0.753238	0.753073	0.753694	0.749883	0.748769	0.748621	0.749695
5	P. aestusnigri GXO14	0.707887	0.82454	0.829895	0.82099		0.862813	0.782226	0.751421	0.748246	0.751901	0.754477	0.755529	0.761882	0.763185	0.75752	0.766303	0.76457	0.761246	0.7625	0.73877	0.741841	0.747953	0.747999	0.749933	0.750427	0.751498	0.751323	0.74788	0.749277	0.751009	0.750413	0.744436	0.752166	0.749154	0.748291	0.748961	0.749551	0.747094	0.74598	0.752613	0.75333	0.75154	0.752938	0.750713	0.751357	0.750981	0.752298	0.749049
6	P. oceani DSM 100277	0.711057	0.82772	0.823849	0.820373	0.863298		0.779711	0.750407	0.747731	0.751605	0.75338	0.75371	0.760153	0.761731	0.755949	0.763487	0.761415	0.760019	0.760864	0.738539	0.7424	0.745283	0.746022	0.748357	0.749353	0.749907	0.750709	0.746946	0.748394	0.749031	0.746116	0.743645	0.74855	0.747642	0.747302	0.746377	0.74749	0.744897	0.745071	0.75242	0.750599	0.749498	0.75058	0.751913	0.747798	0.747468	0.747986	0.746215
7	P. sabulinigri KCTC 22137	0.708442	0.789504	0.784018	0.785442	0.782834	0.779954		0.756059	0.750922	0.753053	0.753755	0.75511	0.759169	0.762031	0.756822	0.76449	0.759357	0.758624	0.759562	0.738265	0.742815	0.743907	0.744226	0.746791	0.748748	0.747364	0.744694	0.744411	0.745488	0.743574	0.741918	0.739987	0.744398	0.746025	0.745835	0.744861	0.74551	0.742217	0.742505	0.750344	0.748718	0.747907	0.748293	0.746088	0.742993	0.741188	0.74378	0.742819
8	P. pelagia JCM 15562	0.708985	0.752661	0.753259	0.753403	0.752265	0.750812	0.754475		0.765386	0.752563	0.752296	0.74934	0.755179	0.753824	0.756257	0.756206	0.750566	0.750318	0.754731	0.72953	0.734269	0.733306	0.732754	0.734488	0.73567	0.735677	0.735262	0.734472	0.734217	0.733485	0.733838	0.731599	0.73336	0.7336	0.734072	0.735294	0.734774	0.734397	0.734716	0.736086	0.736641	0.735259	0.736044	0.735523	0.7344	0.732397	0.734392	0.733924
9	P. salina XCD-X85	0.705847	0.750104	0.750324	0.750101	0.750187	0.747663	0.751485	0.767276		0.748465	0.751018	0.749568	0.753315	0.75507	0.751731	0.756081	0.752929	0.752047	0.751649	0.729687	0.734725	0.735673	0.73598	0.736723	0.737278	0.737575	0.736837	0.735469	0.73612	0.734832	0.735009	0.733654	0.737611	0.73629	0.735986	0.735432	0.736974	0.734615	0.734645	0.738575	0.738728	0.73789	0.739911	0.738627	0.736603	0.735413	0.736518	0.736866
10	P. salegens CECT 8338	0.709131	0.753922	0.754281	0.754656	0.754127	0.75163	0.75227	0.754835	0.746881		0.749255	0.749135	0.754404	0.75696	0.754843	0.758687	0.755844	0.754224	0.761742	0.733208	0.737552	0.740146	0.738097	0.738984	0.740214	0.741096	0.739631	0.740325	0.73959	0.736999	0.73644	0.737639	0.73784	0.738331	0.737837	0.737926	0.739033	0.738997	0.739825	0.742095	0.741063	0.740708	0.741066	0.739791	0.737363	0.736113	0.738075	0.737634
11	P. profundi M5	0.706615	0.75325	0.754448	0.754801	0.753786	0.752123	0.752303	0.752991	0.74988	0.746769		0.757147	0.764187	0.759721	0.769158	0.765682	0.759785	0.757235	0.752636	0.728602	0.735403	0.737441	0.738103	0.740235	0.74071	0.741375	0.741157	0.739323	0.746078	0.738694	0.73768	0.736194	0.739442	0.738757	0.738599	0.739463	0.739754	0.738222	0.737225	0.741405	0.741934	0.740374	0.742441	0.740899	0.739736	0.736607	0.738243	0.737917
12	P. xinjiangensis NRRLB-51270	0.705211	0.756757	0.756841	0.757798	0.757873	0.754933	0.75561	0.750442	0.748956	0.748692	0.757692		0.761253	0.762595	0.757841	0.765353	0.760617	0.760892	0.757186	0.735679	0.740625	0.746177	0.743922	0.746152	0.748528	0.746731	0.747746	0.744585	0.747009	0.744527	0.74475	0.742121	0.745549	0.747027	0.746284	0.745554	0.746265	0.741468	0.742018	0.751494	0.749992	0.748527	0.749758	0.746903	0.744067	0.742732	0.744987	0.744356
13	P. bauzanensis DSM 22558	0.708632	0.762935	0.763343	0.763488	0.762687	0.759758	0.75856	0.757364	0.752334	0.754027	0.763778	0.759085		0.839718	0.827544	0.827991	0.806623	0.797301	0.764613	0.735206	0.742449	0.74964	0.750388	0.75381	0.754423	0.753644	0.75151	0.749792	0.750232	0.749369	0.748166	0.745006	0.751513	0.752461	0.751955	0.750352	0.750281	0.745363	0.745545	0.754086	0.753368	0.752353	0.753322	0.753034	0.749296	0.747598	0.748943	0.748667
14	P. saudimassiliensis 12M76	0.708444	0.767036	0.766495	0.766706	0.765706	0.762606	0.761657	0.75595	0.754569	0.757371	0.760992	0.762021	0.840022		0.817451	0.820765	0.805412	0.801938	0.767668	0.740788	0.746373	0.756438	0.756122	0.758371	0.760948	0.761374	0.758895	0.754186	0.755717	0.757625	0.754734	0.751152	0.756918	0.757815	0.757022	0.755999	0.755766	0.74962	0.75066	0.759632	0.759189	0.758787	0.75987	0.757608	0.751986	0.751629	0.752803	0.752822
15	P. litoralis 2SM5	0.71058	0.758971	0.760255	0.759942	0.760175	0.7575	0.75723	0.761115	0.751466	0.755852	0.770078	0.757724	0.827926	0.818239		0.814407	0.791125	0.789954	0.762876	0.736503	0.741528	0.744255	0.744384	0.746507	0.748419	0.748312	0.747333	0.745122	0.746517	0.743793	0.744173	0.742635	0.745206	0.746886	0.746043	0.745963	0.746471	0.744558	0.744249	0.750468	0.747961	0.748423	0.749486	0.74734	0.7473	0.743495	0.746776	0.746196
16	P. xiamenensis JCM 13530	0.707463	0.765502	0.765653	0.76661	0.766693	0.761507	0.763143	0.757208	0.754237	0.757528	0.765119	0.762939	0.82763	0.819622	0.812809		0.818327	0.812956	0.770716	0.739936	0.747628	0.756972	0.755393	0.76252	0.76291	0.762717	0.760801	0.757144	0.761267	0.75998	0.754674	0.751792	0.756862	0.760578	0.760006	0.761262	0.761002	0.754206	0.754311	0.764567	0.764262	0.763147	0.764638	0.760377	0.756587	0.753444	0.755474	0.75628
17	P. formosensis JCM 18415	0.706245	0.763663	0.766431	0.767138	0.766358	0.761563	0.759298	0.753785	0.751562	0.754982	0.760389	0.761019	0.806607	0.80495	0.789984	0.819228		0.820835	0.770345	0.739092	0.74531	0.75718	0.756056	0.762105	0.762113	0.763124	0.761931	0.75586	0.756775	0.760773	0.756068	0.751466	0.759408	0.759356	0.759225	0.759728	0.759792	0.750421	0.751064	0.762938	0.763436	0.761508	0.763009	0.760861	0.754767	0.753258	0.75425	0.754738
18	P. pertucinogena LMG 1874	0.706121	0.760733	0.760679	0.762036	0.761397	0.759009	0.757498	0.752078	0.749615	0.753352	0.756941	0.758711	0.797457	0.802667	0.789943	0.81392	0.820087		0.766118	0.736273	0.741594	0.752057	0.752576	0.757519	0.758311	0.757955	0.756632	0.752024	0.753659	0.755572	0.752631	0.749779	0.754347	0.753503	0.753531	0.754	0.754807	0.748247	0.747698	0.758872	0.757605	0.757509	0.758295	0.756312	0.750869	0.749966	0.750993	0.751284
19	P. yangmingensis DSM 24213	0.708867	0.764812	0.764648	0.764447	0.76453	0.760554	0.758029	0.755074	0.750302	0.76072	0.752899	0.756202	0.764647	0.76691	0.760648	0.771864	0.768876	0.765429		0.739732	0.746961	0.751573	0.749463	0.753544	0.753796	0.755043	0.752155	0.751494	0.752009	0.754913	0.751308	0.746488	0.75096	0.751421	0.751773	0.753541	0.753575	0.752115	0.750842	0.758722	0.756839	0.754289	0.756245	0.756283	0.750022	0.749622	0.750974	0.748405
20	P. hussainii JCM 19513	0.716166	0.739255	0.739671	0.741385	0.739191	0.739328	0.736871	0.731695	0.728878	0.73199	0.730214	0.73404	0.73613	0.737984	0.734494	0.739099	0.736085	0.736988	0.73977		0.745306	0.74711	0.749849	0.750821	0.75261	0.752538	0.751498	0.749629	0.750152	0.747677	0.747331	0.746666	0.749112	0.75015	0.750783	0.749717	0.749827	0.748218	0.748626	0.75436	0.753976	0.754128	0.753731	0.75487	0.751494	0.751141	0.752367	0.752892
21	P. pohangensis DSM 17875	0.714256	0.743356	0.745398	0.744683	0.745432	0.743701	0.740366	0.736121	0.736156	0.739046	0.736926	0.738839	0.744632	0.74669	0.740737	0.748859	0.745933	0.745463	0.748226	0.745414		0.768523	0.7646	0.769245	0.769809	0.76993	0.769618	0.76779	0.766807	0.768983	0.768232	0.766818	0.770949	0.766669	0.766482	0.771573	0.771865	0.769749	0.769756	0.771501	0.771862	0.772965	0.773105	0.778407	0.772979	0.771237	0.773098	0.773151
22	P. aeruginosa DSM 50071	0.708088	0.748719	0.749047	0.750377	0.750665	0.747821	0.743875	0.736479	0.737924	0.742348	0.739529	0.746357	0.751126	0.756691	0.744869	0.759359	0.757684	0.75532	0.754468	0.748029	0.768284		0.809395	0.822708	0.822626	0.823445	0.82277	0.816747	0.814323	0.800533	0.798386	0.791806	0.798761	0.786787	0.786029	0.793656	0.794348	0.775863	0.77557	0.800013	0.801018	0.798731	0.799927	0.796276	0.784327	0.782559	0.784083	0.78459
23	P. nitroreducens ATCC 33634	0.70861	0.749912	0.749704	0.751401	0.749016	0.746795	0.744377	0.736587	0.735925	0.737491	0.738959	0.744724	0.752257	0.754139	0.744568	0.757436	0.755297	0.754972	0.749181	0.749516	0.764164	0.809104		0.839161	0.8391	0.839112	0.833073	0.827593	0.830752	0.793404	0.794615	0.78978	0.797475	0.783858	0.783449	0.788437	0.78791	0.771545	0.771991	0.792906	0.793734	0.792309	0.793426	0.794141	0.782752	0.782283	0.783738	0.78391
24	P. citronellolis LMG 18378	0.707583	0.750305	0.750139	0.751568	0.749772	0.748256	0.744036	0.73608	0.735907	0.737603	0.737901	0.745041	0.753794	0.757253	0.745307	0.761538	0.758731	0.757829	0.752393	0.75027	0.766347	0.819703	0.837492		0.965623	0.943001	0.842892	0.858924	0.869669	0.806903	0.803848	0.796951	0.80789	0.79115	0.790205	0.795665	0.795802	0.777385	0.776693	0.802804	0.804286	0.801818	0.804332	0.802726	0.788205	0.787368	0.788326	0.788613
25	P. humi CCA1	0.706792	0.75432	0.754446	0.755432	0.752693	0.750913	0.747707	0.739729	0.738908	0.740643	0.741025	0.749018	0.755363	0.760846	0.747032	0.763519	0.761941	0.760091	0.75536	0.753591	0.769582	0.821018	0.838833	0.968397		0.942791	0.846077	0.860098	0.870145	0.809091	0.805194	0.798977	0.809905	0.794328	0.79422	0.79807	0.798445	0.78061	0.781429	0.806752	0.806453	0.804234	0.806421	0.804687	0.790502	0.788884	0.791329	0.790567
26	P. delhiensis RLD-1	0.706758	0.752507	0.751983	0.752994	0.750559	0.748543	0.745955	0.7368	0.737688	0.740008	0.739257	0.745525	0.75319	0.759288	0.747104	0.761643	0.760252	0.75876	0.754273	0.750593	0.768339	0.821149	0.837513	0.944757	0.94302		0.844658	0.859349	0.869732	0.809115	0.805172	0.798946	0.809439	0.794331	0.794243	0.798183	0.798279	0.780247	0.78021	0.806234	0.807538	0.804115	0.807147	0.803647	0.788724	0.787586	0.789283	0.788806
27	P. jinjuensis LMG 21316	0.707065	0.75165	0.750633	0.75186	0.751565	0.748392	0.744255	0.735211	0.736368	0.737288	0.738999	0.745696	0.750938	0.755813	0.74487	0.758602	0.757287	0.755782	0.750243	0.749773	0.767021	0.8216	0.831769	0.845936	0.847395	0.846747		0.837901	0.835816	0.805353	0.803656	0.797773	0.806983	0.792036	0.791074	0.798303	0.799025	0.77589	0.776685	0.803427	0.805388	0.802147	0.80381	0.802748	0.788935	0.788432	0.790022	0.789008
28	P. panipatensis CCM 7469	0.708011	0.749117	0.748912	0.749852	0.747965	0.745631	0.742661	0.735796	0.735688	0.738809	0.738744	0.743875	0.750675	0.753821	0.744577	0.756429	0.752651	0.752967	0.751622	0.748395	0.76659	0.815735	0.828181	0.861745	0.861872	0.862252	0.839657		0.850782	0.798374	0.796295	0.793403	0.800299	0.784343	0.782975	0.792395	0.791409	0.775394	0.774673	0.794706	0.797629	0.795231	0.79713	0.796228	0.785636	0.78539	0.785872	0.786068
29	P. knackmussii LMG 23759	0.708241	0.750449	0.751103	0.752766	0.751599	0.748891	0.745799	0.738149	0.736434	0.739033	0.75111	0.746541	0.751928	0.755909	0.74642	0.767488	0.755594	0.756378	0.752202	0.750091	0.76621	0.812288	0.830318	0.872277	0.869929	0.872073	0.836863	0.850234		0.796816	0.795408	0.792889	0.801186	0.785133	0.784194	0.789606	0.790888	0.774163	0.77462	0.795635	0.798859	0.796034	0.796776	0.796811	0.78507	0.783421	0.785482	0.785969
30	P. thermotolerans CIP 107795	0.70572	0.753212	0.752658	0.750686	0.753647	0.750568	0.74435	0.736519	0.735611	0.737378	0.738219	0.745497	0.751355	0.756006	0.74386	0.76015	0.758124	0.756516	0.756369	0.74877	0.770409	0.801046	0.795025	0.812178	0.812859	0.81362	0.809135	0.799268	0.799312		0.807558	0.79845	0.810208	0.797241	0.796943	0.808199	0.809371	0.78433	0.783201	0.807774	0.809481	0.805096	0.808478	0.812405	0.798059	0.796967	0.798787	0.796413
31	P. furukawaii KF707	0.707408	0.750818	0.752763	0.750742	0.753369	0.748966	0.74432	0.737809	0.735666	0.738017	0.739122	0.742626	0.749887	0.754369	0.743618	0.75664	0.754293	0.754434	0.751912	0.748079	0.767321	0.797604	0.794066	0.806005	0.806307	0.807802	0.803403	0.797236	0.796553	0.803791		0.84971	0.831768	0.788832	0.78814	0.793686	0.79454	0.777602	0.777327	0.792962	0.797152	0.793721	0.7958	0.80352	0.792183	0.790918	0.793762	0.791504
32	P. resinovorans LMG 2274	0.710938	0.745957	0.745361	0.746732	0.74543	0.743591	0.738848	0.732483	0.73406	0.736756	0.736063	0.73952	0.745891	0.748197	0.741849	0.750493	0.749028	0.749746	0.747792	0.746224	0.76424	0.78898	0.78833	0.79821	0.797448	0.798965	0.795754	0.791965	0.791754	0.794133	0.849823		0.816343	0.780456	0.779805	0.785943	0.786243	0.772904	0.773549	0.786721	0.790228	0.788746	0.78982	0.796557	0.785591	0.784793	0.785668	0.785805
33	P. otitidis DSM 17224	0.70902	0.754382	0.755792	0.75149	0.755008	0.750247	0.743966	0.735044	0.735896	0.737169	0.740045	0.741853	0.750476	0.755577	0.744425	0.75615	0.755626	0.754417	0.751624	0.746751	0.769369	0.797912	0.797872	0.810298	0.809816	0.811106	0.807123	0.799687	0.800421	0.80768	0.832184	0.817435		0.789344	0.788536	0.794904	0.795024	0.77935	0.778522	0.798506	0.800716	0.798301	0.799996	0.810001	0.794009	0.791916	0.795718	0.791457
34	P. flexibilis ATCC 29606	0.709396	0.749384	0.749666	0.750065	0.749116	0.745866	0.743897	0.735675	0.734788	0.737902	0.737157	0.743398	0.752478	0.756157	0.744654	0.760127	0.7563	0.755332	0.751656	0.748189	0.764595	0.785755	0.785719	0.794501	0.795207	0.796845	0.792972	0.786133	0.786076	0.796242	0.788479	0.783739	0.790427		0.986113	0.795354	0.795852	0.779366	0.779802	0.801107	0.798922	0.79859	0.798768	0.79566	0.78422	0.783232	0.783897	0.785152
35	P. tuomuerensis CECT 7766	0.708641	0.749215	0.74909	0.749327	0.747816	0.746099	0.743905	0.736066	0.735173	0.736417	0.737855	0.743062	0.752003	0.755062	0.744682	0.759929	0.757288	0.754757	0.751984	0.750514	0.765569	0.786174	0.785382	0.794419	0.795385	0.796278	0.793198	0.784722	0.784801	0.796831	0.787435	0.78202	0.79075	0.987658		0.794845	0.794586	0.778963	0.778648	0.798421	0.797987	0.7956	0.797356	0.797215	0.784885	0.783651	0.784596	0.785988
36	Azotobacter beijerinckii ICMP 8673	0.708079	0.749608	0.749305	0.750128	0.749586	0.746704	0.743792	0.737715	0.735381	0.73795	0.739748	0.745458	0.75194	0.754308	0.745115	0.761239	0.757661	0.75606	0.754829	0.74845	0.769264	0.794485	0.786779	0.79906	0.799841	0.800888	0.799963	0.792348	0.790007	0.806556	0.794978	0.788715	0.796547	0.795111	0.795091		0.906298	0.779411	0.778725	0.808652	0.813383	0.813545	0.813704	0.801339	0.788286	0.78739	0.788222	0.78946
37	Azotobacter chroococcum ATCC 9043	0.707748	0.749945	0.749786	0.750387	0.748389	0.74591	0.743681	0.735481	0.734195	0.737435	0.738472	0.743698	0.750882	0.754081	0.744384	0.75901	0.756793	0.754038	0.754188	0.749203	0.76974	0.794235	0.787523	0.799856	0.800416	0.801807	0.799995	0.792688	0.790749	0.807174	0.79453	0.788655	0.796449	0.796214	0.795432	0.905703		0.780271	0.779301	0.808198	0.811808	0.811918	0.81261	0.801301	0.788038	0.788077	0.788967	0.789371
38	P. fluvialis ASS-1	0.713411	0.747334	0.747573	0.746048	0.74703	0.744524	0.742095	0.734307	0.734721	0.738504	0.737545	0.740659	0.746743	0.748293	0.742664	0.752291	0.749891	0.749063	0.753782	0.748343	0.76977	0.775716	0.772574	0.780251	0.780141	0.780902	0.777709	0.775547	0.775124	0.782142	0.777796	0.774587	0.780925	0.780293	0.77979	0.780905	0.781321		0.986121	0.783588	0.783133	0.782737	0.784994	0.795291	0.783275	0.782486	0.782694	0.783445
39	P. pharmacofabricae ZYSR67-Z	0.712322	0.748276	0.747372	0.747986	0.747441	0.745072	0.741857	0.737501	0.735491	0.740047	0.73916	0.742714	0.746716	0.749771	0.743325	0.753102	0.750693	0.749562	0.751415	0.748673	0.76961	0.775198	0.773283	0.779456	0.782297	0.781813	0.779046	0.776219	0.775265	0.782131	0.778609	0.775313	0.77978	0.780095	0.779939	0.780554	0.782431	0.986058		0.78409	0.782989	0.784023	0.78381	0.793669	0.785228	0.782757	0.784278	0.785113
40	P. guangdongensis CCTCC 2012022	0.708936	0.757721	0.7581	0.758	0.757549	0.755277	0.752077	0.742009	0.742496	0.745124	0.746495	0.752618	0.757778	0.761414	0.752355	0.766608	0.76342	0.763053	0.761478	0.757499	0.772704	0.805016	0.796076	0.810603	0.813106	0.812999	0.808951	0.798429	0.799971	0.808581	0.798201	0.791568	0.803329	0.80482	0.803816	0.81323	0.811964	0.787102	0.78576		0.861047	0.857859	0.861916	0.805082	0.794404	0.792087	0.79433	0.795915
41	P. oryzae KCTC 32247	0.707562	0.757386	0.75799	0.758263	0.756029	0.754826	0.751	0.741905	0.741906	0.745908	0.745446	0.752178	0.75733	0.760355	0.751361	0.767184	0.763343	0.763801	0.760466	0.757844	0.773372	0.802458	0.795876	0.808643	0.810967	0.811745	0.806822	0.800902	0.800272	0.808421	0.800728	0.794425	0.803829	0.801758	0.799932	0.815792	0.814768	0.786238	0.784552	0.857115		0.869842	0.874347	0.80898	0.796163	0.794741	0.796533	0.797093
42	P. linyingensis LMG 25967	0.708716	0.752731	0.753245	0.753665	0.751402	0.749279	0.746108	0.737189	0.73733	0.739601	0.739307	0.746657	0.752628	0.755791	0.747737	0.761641	0.759712	0.758942	0.754375	0.753804	0.771668	0.797466	0.793344	0.80463	0.804535	0.80605	0.802779	0.794974	0.795285	0.802515	0.794683	0.790459	0.799466	0.797488	0.79571	0.812911	0.811768	0.782128	0.782687	0.851859	0.867314		0.919543	0.803561	0.793169	0.791648	0.792366	0.792869
43	P. sagittaria JCM 18195	0.709022	0.754223	0.754697	0.755061	0.753537	0.751111	0.748394	0.73933	0.73928	0.740415	0.741235	0.749071	0.75509	0.758843	0.749386	0.763715	0.761422	0.761374	0.758079	0.753834	0.771975	0.798508	0.794736	0.807237	0.806465	0.80836	0.804188	0.797528	0.796566	0.80599	0.795458	0.791354	0.800571	0.798695	0.797317	0.814552	0.812123	0.784878	0.784502	0.857241	0.872846	0.920136		0.805288	0.79484	0.793594	0.793118	0.795175
44	P. alcaligenes ATCC 14909	0.709853	0.753764	0.754281	0.753572	0.752514	0.750259	0.745814	0.737668	0.737591	0.73784	0.740789	0.744929	0.752325	0.756082	0.747479	0.760531	0.758579	0.756589	0.757015	0.755869	0.778023	0.795393	0.794492	0.80621	0.806214	0.807517	0.80464	0.796558	0.797534	0.810869	0.805786	0.798896	0.811302	0.796503	0.796034	0.801757	0.802741	0.793795	0.792859	0.803659	0.80746	0.804639	0.80678		0.807299	0.806984	0.807174	0.806354
45	P. chengduensis DSM 26382	0.713519	0.748954	0.751248	0.750761	0.751985	0.748435	0.7431	0.736252	0.734762	0.737905	0.74037	0.742733	0.748778	0.751344	0.745727	0.756322	0.75462	0.752324	0.751137	0.750217	0.771891	0.784227	0.78305	0.790402	0.790193	0.790712	0.790595	0.785456	0.785004	0.796275	0.792603	0.787858	0.794614	0.784434	0.784435	0.78935	0.788998	0.783993	0.783809	0.791228	0.794067	0.792888	0.794482	0.806396		0.944881	0.962947	0.917063
46	P. toyotomiensis JCM 15604	0.712569	0.749841	0.749655	0.749029	0.750058	0.747671	0.741062	0.734351	0.733784	0.736449	0.736811	0.741714	0.747815	0.750012	0.742176	0.753333	0.751862	0.749603	0.750165	0.749401	0.770419	0.782509	0.782315	0.78998	0.789333	0.789601	0.788236	0.785951	0.784249	0.794827	0.79179	0.786638	0.79242	0.783134	0.782745	0.786273	0.786951	0.78256	0.782591	0.789174	0.792666	0.791942	0.79253	0.805016	0.944687		0.939923	0.917284
47	P. sihuisensis KCTC 32246	0.71241	0.751073	0.753097	0.750582	0.75279	0.749442	0.745225	0.736982	0.735936	0.739008	0.740393	0.745658	0.749356	0.752514	0.745831	0.756798	0.754476	0.752096	0.751318	0.752792	0.773052	0.784979	0.784525	0.791551	0.792097	0.792436	0.792634	0.78702	0.786924	0.796855	0.795388	0.78787	0.795944	0.785951	0.785514	0.789454	0.790704	0.784474	0.78523	0.792904	0.796143	0.794528	0.794938	0.806832	0.961956	0.938867		0.915005
48	P. alcaliphila JCM 10630	0.713082	0.748038	0.74817	0.74952	0.749299	0.745465	0.743215	0.73614	0.735453	0.736665	0.739119	0.742866	0.749334	0.751553	0.744387	0.754728	0.753237	0.752619	0.750274	0.750525	0.772419	0.783832	0.784513	0.791653	0.79134	0.791479	0.790519	0.787615	0.786738	0.795084	0.792113	0.787961	0.792159	0.78496	0.7846	0.788237	0.788797	0.782442	0.782546	0.791525	0.793752	0.793218	0.794006	0.805138	0.916699	0.91688	0.914817
49	P. guguanensis JCM 18416	0.710162	0.753138	0.752597	0.750538	0.751717	0.749784	0.743213	0.73596	0.734954	0.739106	0.738811	0.744381	0.750405	0.754131	0.744644	0.759089	0.756437	0.754409	0.753357	0.753273	0.774518	0.789522	0.789993	0.798475	0.798859	0.798742	0.797502	0.792719	0.791346	0.804636	0.799647	0.792486	0.80177	0.790644	0.7902	0.795495	0.796322	0.786755	0.786211	0.800411	0.801698	0.798343	0.800922	0.813332	0.890188	0.890281	0.889837	0.889263
50	P. mendocina NCTC 10897	0.711139	0.74873	0.748049	0.749712	0.74694	0.745247	0.743081	0.735357	0.733846	0.736621	0.736779	0.742192	0.747919	0.751045	0.742674	0.754852	0.751906	0.750497	0.747702	0.750216	0.770637	0.781374	0.781725	0.788602	0.789035	0.788435	0.788985	0.784641	0.784277	0.794226	0.7918	0.786276	0.79062	0.783888	0.783778	0.787799	0.787847	0.78174	0.781564	0.791075	0.792358	0.792496	0.792923	0.804103	0.884973	0.882967	0.884724	0.882419
51	P. composti CCUG 59231	0.712747	0.74991	0.752022	0.747999	0.751502	0.748169	0.741878	0.735926	0.734296	0.73719	0.73635	0.741966	0.746727	0.748718	0.741323	0.753985	0.75198	0.749212	0.746342	0.749472	0.768651	0.779965	0.780514	0.786284	0.78673	0.787281	0.786492	0.784035	0.782763	0.792147	0.790548	0.78521	0.790635	0.781127	0.78118	0.784772	0.784713	0.780409	0.779802	0.787768	0.789463	0.788596	0.789385	0.802316	0.894846	0.892484	0.89402	0.890203
52	P. oleovorans subsp. oleovorans ATCC 8062	0.712796	0.753891	0.755107	0.753383	0.754812	0.751927	0.745275	0.737686	0.737756	0.739246	0.739204	0.745475	0.750754	0.752211	0.745338	0.756384	0.753657	0.752558	0.753462	0.752732	0.773295	0.786611	0.786549	0.794111	0.793472	0.794493	0.792583	0.788084	0.788296	0.798927	0.79567	0.790701	0.797601	0.785769	0.786029	0.789694	0.789868	0.783388	0.78353	0.790278	0.793796	0.79315	0.793962	0.809513	0.930162	0.917347	0.930226	0.903976
53	P. pseudoalcaligenes subsp. pseudoalcaligenes LMG 1225	0.71348	0.753372	0.753928	0.751589	0.752118	0.750652	0.744179	0.738475	0.734443	0.738865	0.745873	0.743028	0.750925	0.752087	0.746707	0.76036	0.752468	0.753553	0.751887	0.7532	0.771353	0.787227	0.787555	0.794207	0.793892	0.794731	0.792504	0.788385	0.791114	0.798704	0.79497	0.790668	0.798732	0.786178	0.786141	0.789316	0.790212	0.784876	0.785364	0.792009	0.793673	0.792188	0.793003	0.809777	0.930449	0.917955	0.931172	0.904246
54	P. indoloxydans JCM 14246	0.713512	0.755194	0.756775	0.754092	0.754644	0.753337	0.743471	0.740124	0.737419	0.737775	0.750091	0.74462	0.750966	0.75327	0.748516	0.765372	0.756705	0.752736	0.756294	0.75218	0.772298	0.786157	0.785703	0.792572	0.791295	0.792275	0.792353	0.786588	0.790002	0.79687	0.798984	0.788873	0.798496	0.78421	0.783292	0.788718	0.78932	0.782311	0.782749	0.79049	0.795062	0.792047	0.794459	0.813065	0.929432	0.91975	0.927537	0.904185
55	P. sediminis PI11	0.712877	0.746442	0.746043	0.747197	0.744768	0.743742	0.740893	0.734265	0.734701	0.736259	0.736249	0.739968	0.745918	0.749654	0.742911	0.753081	0.751071	0.749749	0.747666	0.750097	0.769845	0.781516	0.781063	0.787388	0.787805	0.787778	0.787542	0.784276	0.782825	0.791604	0.788075	0.785474	0.790055	0.781287	0.780703	0.784	0.784706	0.779681	0.779451	0.788847	0.789795	0.788741	0.79038	0.80085	0.911354	0.906668	0.909966	0.898713
56	P. kuykendallii NRRL B-59562	0.708994	0.746593	0.746486	0.747697	0.747153	0.744106	0.742026	0.736798	0.734983	0.737177	0.73751	0.744794	0.749747	0.751987	0.742685	0.755959	0.753728	0.752382	0.748268	0.748565	0.770177	0.791981	0.789879	0.799928	0.799276	0.800559	0.799352	0.792791	0.792704	0.799747	0.795212	0.791192	0.796826	0.788469	0.788917	0.796108	0.796545	0.777099	0.776781	0.795378	0.796646	0.795442	0.797266	0.800026	0.788763	0.788979	0.789778	0.790944
57	P. chloritidismutans AW-1	0.711101	0.749435	0.748147	0.74953	0.748464	0.750235	0.741921	0.739931	0.735628	0.738375	0.741211	0.743963	0.748193	0.750903	0.746105	0.753196	0.750472	0.749425	0.7534	0.747987	0.767304	0.778001	0.774746	0.781998	0.783033	0.782754	0.783373	0.778488	0.778814	0.785619	0.782799	0.776873	0.781869	0.782588	0.781968	0.787362	0.787113	0.773145	0.772297	0.784895	0.786544	0.787915	0.789288	0.790108	0.782753	0.781071	0.782451	0.781646
58	P. kunmingensis DSM 25974	0.710042	0.747313	0.745358	0.748272	0.744939	0.746228	0.74001	0.736178	0.732499	0.735345	0.743745	0.742085	0.745638	0.747635	0.743004	0.756373	0.750299	0.746964	0.747677	0.74445	0.764178	0.776477	0.773922	0.781859	0.78088	0.781213	0.782209	0.776447	0.778425	0.781748	0.778693	0.776046	0.781029	0.779741	0.779468	0.784859	0.785562	0.769814	0.76979	0.782958	0.785764	0.786186	0.786568	0.787042	0.781846	0.77809	0.780758	0.77983
59	P. perfectomarina ATCC 14405	0.711822	0.743951	0.744098	0.746606	0.745932	0.743417	0.738776	0.733428	0.7321	0.73551	0.736005	0.739045	0.743666	0.745132	0.740449	0.746302	0.746015	0.744922	0.748324	0.743144	0.75988	0.770308	0.768859	0.77423	0.774773	0.773912	0.774517	0.771411	0.770441	0.776841	0.77423	0.770645	0.773794	0.775326	0.775455	0.778994	0.778049	0.769216	0.76786	0.776341	0.780438	0.780759	0.780748	0.779094	0.77718	0.77507	0.776675	0.776041
60	P. songnenensis NEAU-ST5-5	0.711391	0.746336	0.745757	0.745115	0.745583	0.743162	0.740674	0.734026	0.732897	0.736575	0.737439	0.74172	0.747125	0.74838	0.742681	0.752784	0.750647	0.748662	0.747794	0.746961	0.764951	0.777088	0.776103	0.78264	0.782357	0.782659	0.78221	0.777542	0.777357	0.78221	0.778931	0.775913	0.780197	0.781688	0.781639	0.785445	0.785221	0.772122	0.772056	0.785849	0.786764	0.787684	0.788123	0.785227	0.781273	0.779429	0.781466	0.781402
61	P. stutzeri ATCC 17588	0.710356	0.749997	0.749755	0.752989	0.750477	0.748123	0.743285	0.738495	0.736374	0.74074	0.741869	0.744868	0.750866	0.753949	0.746118	0.756447	0.753288	0.753155	0.755916	0.750256	0.769121	0.784486	0.781853	0.78926	0.789689	0.790399	0.788414	0.783867	0.784024	0.792358	0.789305	0.78203	0.787545	0.788019	0.787542	0.791968	0.792702	0.778275	0.778452	0.790098	0.793834	0.793687	0.79416	0.795573	0.788138	0.787036	0.787434	0.787698
62	P. balearica DSM 6083	0.709692	0.752167	0.748181	0.748894	0.748232	0.750316	0.741773	0.738521	0.734176	0.739972	0.742834	0.744942	0.75179	0.753472	0.744228	0.756566	0.754652	0.753164	0.751614	0.74727	0.763768	0.781257	0.777669	0.785669	0.785748	0.786169	0.783859	0.781567	0.78063	0.78753	0.787629	0.77709	0.783704	0.784572	0.784717	0.78922	0.789478	0.771784	0.772177	0.787733	0.79096	0.788888	0.79014	0.787066	0.781266	0.78057	0.781985	0.782062
63	P. xanthomarina CCUG 46543	0.713995	0.743653	0.742439	0.743444	0.742678	0.743196	0.738321	0.73309	0.733238	0.73721	0.735477	0.738978	0.7432	0.744722	0.740466	0.745501	0.743875	0.742668	0.741728	0.741417	0.75724	0.763487	0.761787	0.765188	0.766552	0.765722	0.767071	0.764116	0.76511	0.765887	0.764363	0.763259	0.765012	0.76726	0.766624	0.767739	0.767255	0.761109	0.760755	0.76786	0.766836	0.768321	0.768128	0.769214	0.767244	0.765877	0.767194	0.76771
64	P. zhaodongensis DSM 27559	0.710215	0.733877	0.733258	0.734604	0.73386	0.732954	0.730707	0.726764	0.727168	0.727446	0.728818	0.732553	0.735305	0.737736	0.733683	0.738707	0.737944	0.736942	0.734323	0.735138	0.750864	0.756186	0.756695	0.759602	0.759728	0.759762	0.760341	0.758679	0.758253	0.759913	0.75896	0.758388	0.759262	0.760398	0.75986	0.761964	0.761445	0.755217	0.755234	0.760664	0.762281	0.761733	0.762282	0.762544	0.760939	0.760085	0.76098	0.76098
65	P. saudiphocaensis 20 BN	0.71407	0.744713	0.744426	0.74588	0.745403	0.743866	0.740295	0.735023	0.734582	0.736178	0.737271	0.739874	0.747872	0.747709	0.743746	0.751453	0.749804	0.749134	0.745776	0.74528	0.762675	0.772479	0.771922	0.776517	0.777019	0.776992	0.776872	0.77199	0.771704	0.77586	0.774378	0.7723	0.775169	0.77561	0.775017	0.778041	0.777932	0.769783	0.770293	0.777782	0.778958	0.778856	0.780414	0.780022	0.776574	0.775625	0.776663	0.77712
66	P. azotifigens DSM 17556	0.706481	0.751619	0.750123	0.752396	0.750068	0.748672	0.743681	0.737015	0.735469	0.736192	0.740572	0.746024	0.748671	0.754471	0.744423	0.757797	0.756511	0.753976	0.753038	0.748663	0.765739	0.790955	0.785557	0.798627	0.79825	0.799828	0.795712	0.791109	0.789993	0.801915	0.790213	0.785238	0.794335	0.789898	0.788721	0.799232	0.799985	0.775002	0.776339	0.798049	0.800375	0.79594	0.79913	0.79609	0.787179	0.786779	0.788529	0.788585
67	P. urumqiensis T3	0.707833	0.742918	0.742681	0.742165	0.743152	0.739072	0.737983	0.73153	0.730491	0.7324	0.734381	0.740314	0.742863	0.745979	0.737657	0.750055	0.747206	0.746313	0.743226	0.741028	0.757667	0.775046	0.77278	0.77938	0.779197	0.779646	0.778114	0.774472	0.775235	0.780107	0.775058	0.771214	0.776185	0.773386	0.773089	0.778907	0.779343	0.764103	0.764418	0.777945	0.780728	0.77837	0.780386	0.778802	0.772095	0.771861	0.771579	0.772448
68	P. indica LMG 23066	0.710831	0.748839	0.747109	0.746896	0.746117	0.744519	0.74179	0.737748	0.735268	0.73773	0.739023	0.743493	0.74876	0.751498	0.742523	0.75484	0.752832	0.750732	0.749658	0.748972	0.77163	0.79219	0.788207	0.797757	0.796745	0.797081	0.798117	0.792289	0.791623	0.799652	0.799318	0.796041	0.796598	0.788183	0.788063	0.800279	0.798791	0.776872	0.777259	0.794439	0.796538	0.795606	0.798104	0.800834	0.791595	0.792825	0.791556	0.792861
69	P. luteola JCM 3352	0.709778	0.728576	0.726604	0.727965	0.7276	0.726222	0.724471	0.72227	0.722528	0.725739	0.722996	0.723993	0.726781	0.728047	0.725359	0.726342	0.726846	0.727279	0.729296	0.728022	0.734451	0.738271	0.738527	0.739076	0.739951	0.739548	0.740384	0.739306	0.739941	0.736691	0.738793	0.738936	0.738778	0.737369	0.736817	0.736794	0.736046	0.737949	0.738348	0.739368	0.739198	0.738766	0.738859	0.739327	0.737356	0.736432	0.737659	0.737018
70	P. zeshuii KACC 15471	0.709476	0.73091	0.728994	0.729449	0.728623	0.726951	0.725199	0.72281	0.72189	0.726388	0.723338	0.725183	0.726202	0.727289	0.72453	0.726715	0.727018	0.727105	0.730902	0.728537	0.734165	0.737925	0.73969	0.740786	0.740939	0.740672	0.739848	0.740013	0.740196	0.737615	0.739808	0.739885	0.739244	0.736521	0.73595	0.736396	0.735866	0.737607	0.737901	0.739172	0.739863	0.738474	0.738093	0.740208	0.736885	0.736388	0.737165	0.736367
71	P. duriflava KCTC 22129	0.709164	0.723458	0.723677	0.724839	0.724379	0.722911	0.721235	0.718232	0.71865	0.721342	0.719511	0.721591	0.720854	0.722408	0.719728	0.721496	0.724162	0.722015	0.723665	0.724388	0.729206	0.7327	0.731717	0.732606	0.733875	0.733592	0.733382	0.733486	0.733603	0.730452	0.732594	0.733055	0.732805	0.730623	0.730015	0.730551	0.730064	0.732782	0.73334	0.731411	0.731029	0.731087	0.730887	0.731747	0.73184	0.730476	0.731732	0.732047
72	P. oryzihabitans ATCC 43272	0.704859	0.745567	0.745456	0.746486	0.744352	0.745169	0.7404	0.733058	0.735209	0.738685	0.736099	0.739429	0.746936	0.750702	0.740915	0.753297	0.755408	0.752502	0.746888	0.74527	0.757163	0.779037	0.776035	0.786179	0.784134	0.786113	0.782963	0.779508	0.777409	0.782042	0.775981	0.772219	0.779145	0.775801	0.774579	0.776838	0.776918	0.762861	0.763223	0.784311	0.783514	0.782389	0.783684	0.778534	0.769133	0.768057	0.769257	0.768988
73	P. psychrotolerans LMG 21977	0.705594	0.745733	0.743486	0.745295	0.742427	0.742415	0.737735	0.732134	0.733683	0.7338	0.752308	0.737465	0.748633	0.749865	0.741052	0.756158	0.752993	0.750325	0.74503	0.743022	0.756512	0.775477	0.773826	0.783137	0.782152	0.783888	0.780014	0.77683	0.779563	0.781151	0.775373	0.770771	0.777505	0.772744	0.77253	0.774505	0.774304	0.762846	0.762642	0.781413	0.780573	0.783131	0.781963	0.77643	0.768605	0.76678	0.767356	0.769563
74	P. anguilliseptica LMG 21629	0.717147	0.745565	0.746565	0.758605	0.747007	0.745197	0.742387	0.74863	0.735945	0.73889	0.738399	0.740322	0.747879	0.749784	0.745622	0.751352	0.748536	0.749476	0.746096	0.749546	0.771542	0.77353	0.773514	0.777981	0.781429	0.778813	0.778078	0.773876	0.774712	0.780122	0.780842	0.781705	0.782516	0.779456	0.77411	0.779255	0.779677	0.779881	0.77868	0.780359	0.780285	0.7912	0.783229	0.795215	0.797374	0.794246	0.797528	0.796937
75	P. peli LMG 23201	0.717631	0.743402	0.743436	0.744054	0.742874	0.74282	0.7382	0.733407	0.732232	0.735125	0.734225	0.736367	0.74295	0.74513	0.739877	0.747949	0.745837	0.744656	0.744039	0.74886	0.768993	0.770732	0.772635	0.776422	0.776458	0.776101	0.776364	0.773297	0.772284	0.776845	0.777539	0.777308	0.777908	0.771094	0.771116	0.775806	0.775595	0.769959	0.769863	0.775572	0.777119	0.778377	0.779002	0.787887	0.792845	0.791337	0.792633	0.791982
76	P. guineae M8	0.718086	0.736426	0.737175	0.738891	0.73676	0.737137	0.734321	0.730328	0.728131	0.731496	0.730189	0.732703	0.737651	0.738806	0.734283	0.739945	0.73774	0.738035	0.739453	0.744477	0.760625	0.76113	0.762657	0.765831	0.765608	0.765376	0.765152	0.763921	0.76244	0.766472	0.765844	0.766948	0.768597	0.761292	0.761055	0.766136	0.766184	0.762549	0.762155	0.765492	0.76691	0.765777	0.767585	0.776554	0.782099	0.780044	0.781694	0.782082
77	P. cuatrocienegasensis CIP 109853	0.713967	0.744407	0.746334	0.744423	0.746073	0.742219	0.74116	0.735702	0.735191	0.738532	0.736114	0.739676	0.744544	0.747163	0.741126	0.75124	0.747516	0.745753	0.745903	0.749466	0.771984	0.777952	0.777226	0.783875	0.783962	0.78432	0.784679	0.781249	0.779347	0.786879	0.785449	0.782624	0.786178	0.779083	0.778858	0.783975	0.782246	0.774876	0.774766	0.783906	0.786371	0.785879	0.787548	0.791781	0.800657	0.800358	0.800237	0.799553
78	P. marincola JCM 14761	0.718652	0.737605	0.737872	0.739429	0.738467	0.737438	0.732919	0.732153	0.730167	0.732035	0.72843	0.732689	0.735099	0.735704	0.734041	0.73757	0.734413	0.736837	0.740587	0.742716	0.756059	0.755033	0.754767	0.755701	0.757963	0.757461	0.756434	0.756367	0.755973	0.757375	0.757266	0.759094	0.760715	0.75605	0.754767	0.755547	0.755623	0.756799	0.756521	0.757283	0.756845	0.758	0.758334	0.765536	0.768595	0.767838	0.769123	0.768799
79	P. segetis IMSNU 1410	0.717548	0.735479	0.734932	0.736153	0.734998	0.733618	0.732199	0.728496	0.72911	0.730479	0.728421	0.730401	0.735414	0.735257	0.732753	0.737683	0.734567	0.733206	0.735281	0.739219	0.753015	0.752938	0.752021	0.753457	0.753966	0.75323	0.754863	0.753749	0.752858	0.755275	0.758096	0.757163	0.757477	0.751587	0.751512	0.753957	0.753894	0.75466	0.754433	0.754755	0.755986	0.756312	0.757024	0.762282	0.765248	0.762817	0.765315	0.765739
80	P. benzenivorans DSM 8628	0.709697	0.751301	0.750119	0.750857	0.749296	0.747044	0.744333	0.740158	0.737376	0.739102	0.740564	0.743979	0.750467	0.755302	0.744593	0.760313	0.755627	0.755571	0.756656	0.75264	0.779451	0.799083	0.792201	0.803835	0.804266	0.804749	0.803594	0.798098	0.794212	0.808563	0.805422	0.799012	0.805021	0.79175	0.791472	0.806064	0.806437	0.784742	0.784601	0.801221	0.807065	0.809779	0.809195	0.812166	0.809974	0.808211	0.808665	0.809431
81	P. borbori LMG 23199	0.711852	0.747615	0.748999	0.748585	0.748686	0.745365	0.743797	0.738962	0.737717	0.738409	0.740479	0.743445	0.749313	0.753505	0.744668	0.756548	0.752451	0.752866	0.750965	0.750716	0.778881	0.789885	0.78607	0.795385	0.794937	0.796169	0.795168	0.790757	0.787781	0.799728	0.793026	0.790314	0.795724	0.785815	0.785855	0.797287	0.797262	0.780301	0.780494	0.79518	0.796524	0.798271	0.796936	0.802574	0.803541	0.802827	0.804231	0.805601
82	P. taeanensis KCTC 22612	0.713625	0.742158	0.742261	0.741923	0.742273	0.739629	0.739409	0.74053	0.73249	0.734428	0.73456	0.736105	0.741654	0.745918	0.738108	0.748087	0.745261	0.745358	0.746319	0.745798	0.769291	0.776967	0.774687	0.780186	0.780599	0.781031	0.780147	0.778521	0.774923	0.782808	0.780121	0.77889	0.78417	0.77099	0.771358	0.782527	0.781589	0.769886	0.769758	0.778915	0.782737	0.782363	0.782537	0.788276	0.791016	0.789717	0.791138	0.792246
83	P. argentinensis LMG 22563	0.710351	0.747058	0.746765	0.747094	0.747473	0.744347	0.741816	0.735919	0.73403	0.737834	0.735948	0.741782	0.747814	0.750625	0.742348	0.754851	0.753551	0.751138	0.748431	0.748504	0.768462	0.781621	0.782534	0.788742	0.789612	0.790129	0.789718	0.784445	0.783953	0.793589	0.787763	0.784273	0.790929	0.782635	0.78228	0.787439	0.787318	0.776456	0.776288	0.790194	0.789241	0.789343	0.78987	0.797159	0.799783	0.799818	0.799181	0.798786
84	P. punonensis CECT 8089	0.712418	0.744878	0.745656	0.745947	0.7457	0.74411	0.739924	0.734161	0.733401	0.734572	0.735736	0.738788	0.7455	0.747297	0.742147	0.749787	0.747308	0.746943	0.746122	0.746933	0.765773	0.775688	0.776453	0.781279	0.781129	0.781709	0.780626	0.778461	0.778539	0.783728	0.780531	0.780326	0.783515	0.775913	0.775458	0.779281	0.779162	0.772018	0.77222	0.779617	0.781693	0.782091	0.782477	0.789349	0.793479	0.791333	0.793178	0.791796
85	P. straminea LMG 21615	0.711294	0.748552	0.74795	0.749163	0.746856	0.744151	0.743675	0.734918	0.736021	0.737197	0.73689	0.741198	0.748025	0.750919	0.742941	0.753932	0.752368	0.750303	0.748824	0.751454	0.769669	0.782696	0.782789	0.789715	0.790183	0.790056	0.789682	0.784594	0.785092	0.793182	0.787353	0.786403	0.790879	0.783273	0.782933	0.786417	0.786844	0.777193	0.776718	0.788362	0.789687	0.788631	0.790576	0.796746	0.799621	0.797719	0.798522	0.798107
86	P. flavescens LMG 18387	0.7087	0.745007	0.744716	0.744972	0.744782	0.742438	0.739495	0.733212	0.734234	0.734351	0.734617	0.740421	0.744982	0.74859	0.741261	0.752133	0.750148	0.748755	0.744579	0.7469	0.768187	0.779452	0.778231	0.784591	0.78455	0.78505	0.783693	0.782744	0.781818	0.790073	0.786619	0.784083	0.787131	0.780945	0.780324	0.783635	0.784568	0.7754	0.775399	0.784238	0.78558	0.7857	0.786481	0.794197	0.79445	0.79288	0.794865	0.794621
87	P. seleniipraecipitans LMG 25475	0.713333	0.744209	0.74341	0.743733	0.742922	0.74264	0.739514	0.733598	0.73198	0.735147	0.733659	0.739491	0.744116	0.744433	0.738965	0.74719	0.74655	0.745092	0.744175	0.745765	0.765747	0.774888	0.773193	0.778644	0.778345	0.779116	0.778521	0.775361	0.77551	0.781736	0.778509	0.778	0.780513	0.774119	0.774251	0.778749	0.778104	0.768813	0.769445	0.778083	0.780652	0.78014	0.780817	0.78706	0.790119	0.789022	0.790738	0.789717
88	P. mangrovi TC-11	0.709553	0.749072	0.749539	0.749157	0.75	0.747971	0.74498	0.739331	0.737343	0.739992	0.73901	0.746622	0.752121	0.756649	0.747928	0.758545	0.757785	0.754922	0.753836	0.75161	0.771142	0.783489	0.779097	0.788416	0.7888	0.789837	0.786634	0.783579	0.784253	0.789534	0.784746	0.780433	0.78773	0.786159	0.785866	0.792337	0.793897	0.779634	0.778865	0.793498	0.792853	0.793812	0.796776	0.793568	0.784731	0.782858	0.784534	0.784373
89	P. massiliensis CB1	0.706964	0.739387	0.74037	0.739635	0.740073	0.737988	0.736222	0.732382	0.730859	0.734257	0.731923	0.73577	0.74273	0.745955	0.737154	0.745419	0.746037	0.746237	0.742699	0.739917	0.753858	0.763403	0.760813	0.768015	0.770448	0.768741	0.767622	0.763383	0.763693	0.769474	0.767005	0.763811	0.768864	0.764709	0.764751	0.763715	0.764988	0.757252	0.757483	0.767245	0.765514	0.766419	0.767131	0.769672	0.763765	0.761724	0.763392	0.763525
90	P. sichuanensis WCHPs060039	0.710886	0.746359	0.745712	0.74706	0.744626	0.744039	0.74175	0.734921	0.73385	0.735397	0.737425	0.742029	0.74679	0.751035	0.743536	0.751747	0.751559	0.750051	0.746765	0.747639	0.765011	0.782634	0.782656	0.789749	0.79046	0.790954	0.787198	0.783599	0.785228	0.788525	0.784659	0.782769	0.789884	0.779325	0.77913	0.781419	0.781555	0.7687	0.768049	0.788472	0.787916	0.78801	0.787891	0.792225	0.782151	0.779117	0.781004	0.781844
91	P. asiatica RYU5	0.709429	0.75001	0.748952	0.749232	0.748038	0.747379	0.743792	0.737543	0.736535	0.740382	0.738523	0.743483	0.749632	0.752518	0.746806	0.755376	0.753202	0.752536	0.749773	0.750867	0.764914	0.783325	0.78118	0.788607	0.789117	0.789363	0.785738	0.783711	0.784351	0.786902	0.783974	0.781814	0.787869	0.77888	0.778709	0.778172	0.779502	0.771513	0.77176	0.785396	0.78552	0.785263	0.785659	0.791417	0.782607	0.779575	0.78278	0.781469
92	P. pyomelaminifaciens MR 02	0.709642	0.747552	0.746741	0.747499	0.74588	0.744273	0.740637	0.733273	0.732057	0.735974	0.738704	0.740068	0.747227	0.749449	0.740779	0.756934	0.750562	0.748626	0.748777	0.747985	0.763248	0.780165	0.779918	0.789475	0.788431	0.788896	0.785592	0.783439	0.785602	0.787519	0.782448	0.780226	0.785998	0.775682	0.776037	0.776418	0.777484	0.769506	0.769751	0.782037	0.783556	0.782969	0.783244	0.787886	0.779956	0.778156	0.779781	0.779791
93	P. shirazica LMG 29953	0.708985	0.746333	0.746165	0.747238	0.745731	0.74504	0.742024	0.732511	0.73413	0.735034	0.735183	0.740399	0.747109	0.749573	0.741615	0.752499	0.750644	0.749799	0.746897	0.74868	0.764078	0.780756	0.780241	0.788942	0.787636	0.788186	0.785071	0.782201	0.783236	0.785797	0.78215	0.781154	0.78623	0.776474	0.776429	0.776696	0.777085	0.768905	0.769341	0.782298	0.783847	0.783905	0.784046	0.787719	0.780223	0.779149	0.781068	0.781025
94	P. inefficax DSM 108619	0.709233	0.747008	0.747378	0.748451	0.746644	0.745488	0.741617	0.735285	0.734682	0.737708	0.735956	0.743124	0.747621	0.751849	0.743741	0.752988	0.751453	0.750743	0.748792	0.748728	0.763924	0.780041	0.779634	0.787818	0.788031	0.787666	0.785038	0.7828	0.783834	0.78578	0.7814	0.779724	0.78556	0.777646	0.777767	0.776455	0.776994	0.76972	0.769828	0.782915	0.783569	0.78283	0.782652	0.787718	0.780118	0.778719	0.780714	0.781278
95	P. persica LMG 29757	0.710834	0.748064	0.747468	0.748502	0.747697	0.746424	0.743186	0.733962	0.734234	0.737017	0.736338	0.741987	0.748634	0.75172	0.743946	0.753786	0.752467	0.750162	0.747743	0.749958	0.766219	0.784534	0.782024	0.789908	0.790207	0.790707	0.7869	0.784947	0.786049	0.788497	0.783781	0.781311	0.787975	0.777482	0.777741	0.780391	0.780322	0.771289	0.771321	0.783825	0.784944	0.785446	0.784649	0.789785	0.781548	0.779539	0.782268	0.781859
96	RD8MR3*	0.709998	0.746532	0.745878	0.747657	0.746236	0.744795	0.741571	0.734627	0.733705	0.737344	0.735509	0.741809	0.746931	0.750923	0.74287	0.751695	0.750945	0.749597	0.749302	0.749176	0.765528	0.782222	0.780171	0.788315	0.788368	0.788264	0.786401	0.782979	0.783701	0.787024	0.783509	0.780753	0.786514	0.776797	0.776553	0.779364	0.778186	0.770282	0.770808	0.783128	0.784167	0.784373	0.784558	0.787788	0.780158	0.778146	0.779828	0.780908
97	RD9SR1*	0.712233	0.747498	0.747176	0.748374	0.745846	0.745702	0.742683	0.73592	0.734718	0.737461	0.736025	0.742208	0.747574	0.751026	0.744433	0.753918	0.751005	0.750431	0.750928	0.751632	0.766454	0.781457	0.779718	0.787407	0.788186	0.788361	0.78562	0.781672	0.78305	0.785915	0.782046	0.77997	0.785403	0.776286	0.776011	0.777681	0.778252	0.771319	0.771484	0.783663	0.784796	0.783513	0.7846	0.787494	0.779777	0.778001	0.780606	0.780262
98	P. monteilii DSM 14164	0.711267	0.746066	0.74863	0.744923	0.749264	0.745484	0.73842	0.730724	0.730343	0.732214	0.742552	0.735813	0.745479	0.745794	0.741219	0.754528	0.747313	0.744887	0.743913	0.745428	0.759269	0.773362	0.774472	0.782244	0.780873	0.78148	0.779992	0.777023	0.77955	0.779989	0.777	0.775552	0.782037	0.771065	0.770083	0.769885	0.769451	0.76498	0.764355	0.775663	0.775396	0.775778	0.775402	0.782396	0.774846	0.77495	0.780904	0.774741
99	RW1P2*	0.709875	0.745212	0.744838	0.746521	0.744239	0.743344	0.740673	0.732703	0.732664	0.734837	0.733091	0.737789	0.744087	0.747334	0.741502	0.748568	0.749029	0.746919	0.745024	0.747023	0.761812	0.775182	0.775629	0.782901	0.783422	0.782721	0.781131	0.777404	0.778771	0.779815	0.777277	0.776367	0.780622	0.773288	0.773255	0.770932	0.771948	0.764754	0.765201	0.777206	0.778443	0.778145	0.7784	0.782165	0.776442	0.774801	0.776262	0.775676
100	P. alloputida LMG 29756	0.710985	0.743859	0.743346	0.744467	0.743085	0.741425	0.739133	0.732165	0.732511	0.734432	0.732807	0.739616	0.743644	0.748105	0.739172	0.747864	0.748137	0.747174	0.744985	0.745025	0.761233	0.773358	0.773546	0.780993	0.781283	0.781214	0.779023	0.776171	0.777393	0.77917	0.775392	0.773201	0.779211	0.771113	0.771303	0.772235	0.771724	0.765437	0.765151	0.77576	0.776397	0.776425	0.776825	0.780649	0.775118	0.773688	0.775076	0.774243
101	P. putida ATCC 12633	0.710076	0.748888	0.748341	0.749723	0.747959	0.748145	0.743163	0.738758	0.738192	0.740398	0.739178	0.743356	0.748557	0.751543	0.745102	0.752162	0.751432	0.751765	0.749006	0.750555	0.765144	0.777692	0.776953	0.782954	0.785171	0.784957	0.780321	0.779764	0.7804	0.782995	0.78083	0.778098	0.784103	0.776955	0.775567	0.775533	0.776743	0.769688	0.770032	0.7826	0.782432	0.782082	0.783386	0.786512	0.777875	0.775473	0.778367	0.778606
102	P. fulva CIP 106765	0.709443	0.741339	0.74168	0.741519	0.740527	0.740453	0.737597	0.730572	0.730998	0.732243	0.730212	0.736325	0.740524	0.744426	0.736255	0.744793	0.746236	0.743106	0.741142	0.742568	0.756995	0.766751	0.766259	0.772383	0.772366	0.773447	0.770432	0.768766	0.768898	0.772005	0.770621	0.768517	0.771873	0.765935	0.766197	0.764797	0.764662	0.760158	0.760603	0.768646	0.770675	0.77122	0.770829	0.774159	0.768397	0.767159	0.768759	0.769067
103	P. parafulva DSM 17004	0.709741	0.743576	0.742935	0.743383	0.741602	0.739582	0.737808	0.730873	0.730894	0.732057	0.730147	0.735862	0.743282	0.745753	0.737543	0.746891	0.746401	0.745328	0.742576	0.743164	0.759055	0.770837	0.771873	0.778245	0.778127	0.778824	0.775749	0.772937	0.774486	0.776217	0.77633	0.772794	0.777794	0.769613	0.769615	0.767252	0.767918	0.762588	0.762631	0.772836	0.774146	0.773647	0.774062	0.77769	0.77271	0.771597	0.773086	0.772157
104	SWRI67*	0.711792	0.744831	0.745656	0.745692	0.746222	0.743536	0.740663	0.732651	0.732281	0.736043	0.735098	0.740138	0.744117	0.748366	0.741012	0.748754	0.747981	0.747598	0.745982	0.747208	0.761787	0.775311	0.775605	0.781978	0.781501	0.781435	0.779878	0.777624	0.778504	0.780268	0.777884	0.775533	0.78089	0.772479	0.77265	0.771912	0.771523	0.766306	0.766709	0.778023	0.777821	0.777762	0.778151	0.784288	0.774788	0.774647	0.775508	0.775395
105	SWRI100*	0.711517	0.743554	0.744237	0.744026	0.744565	0.742205	0.738963	0.730946	0.732007	0.733436	0.733212	0.738761	0.743003	0.747254	0.740748	0.748955	0.747559	0.746362	0.745231	0.747578	0.762269	0.775499	0.774638	0.781233	0.781423	0.781507	0.778971	0.777243	0.778364	0.780214	0.778262	0.775437	0.78066	0.772712	0.772493	0.772034	0.772069	0.766567	0.766506	0.777444	0.778431	0.777878	0.778572	0.782986	0.775245	0.774617	0.775777	0.7754
106	SWRI50*	0.712401	0.74469	0.744709	0.744687	0.744192	0.742551	0.739526	0.732139	0.731088	0.734493	0.73341	0.739461	0.744532	0.747682	0.739528	0.749422	0.748326	0.745981	0.745084	0.747294	0.760411	0.774614	0.775005	0.781935	0.782147	0.782609	0.781576	0.777926	0.778568	0.779492	0.777828	0.776087	0.78077	0.77233	0.772115	0.771641	0.771657	0.765648	0.765532	0.777916	0.778174	0.777769	0.778996	0.783111	0.77571	0.774737	0.776434	0.775705
107	SWRI68*	0.711343	0.745802	0.745333	0.747134	0.74428	0.744105	0.740758	0.733554	0.732881	0.736405	0.734019	0.740174	0.745448	0.74896	0.741183	0.74966	0.749701	0.747901	0.744962	0.748361	0.761752	0.776349	0.776816	0.783471	0.784031	0.783906	0.780237	0.778953	0.779737	0.781804	0.778747	0.776236	0.782082	0.7735	0.772142	0.774773	0.775111	0.767399	0.767811	0.779783	0.779726	0.779892	0.780708	0.785045	0.776621	0.776438	0.777	0.777756
108	SWRI77*	0.712334	0.746269	0.745826	0.74699	0.746393	0.744749	0.74002	0.733621	0.734532	0.735625	0.734242	0.739914	0.746247	0.749278	0.740758	0.749453	0.748058	0.747233	0.746556	0.747552	0.76211	0.775416	0.775807	0.783933	0.783679	0.783977	0.781188	0.779667	0.779189	0.78195	0.77812	0.77678	0.781928	0.773633	0.773291	0.775048	0.774532	0.766443	0.766817	0.780009	0.779829	0.780423	0.780308	0.784229	0.777173	0.775633	0.776584	0.776902
109	SWRI59*	0.711079	0.74549	0.744445	0.745765	0.742881	0.742492	0.739271	0.733252	0.731963	0.734771	0.732366	0.740611	0.74483	0.748049	0.740906	0.750375	0.748677	0.747367	0.744624	0.746723	0.761801	0.77673	0.776784	0.783032	0.784296	0.783894	0.780331	0.779188	0.780043	0.782236	0.778586	0.776772	0.782042	0.774367	0.772852	0.774067	0.773262	0.768176	0.767965	0.780625	0.780422	0.78146	0.781272	0.784566	0.776589	0.77643	0.777305	0.777286
110	RW3S1*	0.709753	0.744561	0.744696	0.746622	0.746389	0.743741	0.740677	0.732979	0.733716	0.735275	0.733621	0.740569	0.745974	0.748608	0.739945	0.75142	0.748835	0.748911	0.745284	0.746627	0.76248	0.779488	0.779205	0.785952	0.786084	0.785379	0.784015	0.781285	0.78144	0.783963	0.781523	0.778233	0.784624	0.775733	0.775677	0.776053	0.776648	0.767034	0.767425	0.782924	0.783001	0.782867	0.783315	0.785246	0.779278	0.777662	0.779338	0.778909
111	RW3S2*	0.710976	0.74607	0.745467	0.746621	0.745964	0.743649	0.740074	0.733013	0.735413	0.735301	0.734534	0.741646	0.74684	0.749337	0.740875	0.751481	0.749985	0.749538	0.747521	0.746832	0.764195	0.779111	0.778541	0.786052	0.786125	0.786472	0.783745	0.780998	0.780991	0.78346	0.781973	0.77883	0.784297	0.776309	0.776616	0.775756	0.776081	0.766402	0.767099	0.783571	0.783671	0.783392	0.783508	0.786242	0.779649	0.777731	0.779826	0.779583
112	RW10S2*	0.708714	0.745325	0.74428	0.745349	0.74483	0.743228	0.739616	0.731998	0.732935	0.734444	0.733469	0.739372	0.745392	0.747878	0.74073	0.750593	0.747851	0.747828	0.745051	0.746278	0.763334	0.779995	0.779803	0.78706	0.787116	0.787635	0.784462	0.780928	0.781586	0.784923	0.782384	0.779653	0.785118	0.776326	0.776069	0.776141	0.776879	0.767151	0.767121	0.783187	0.783486	0.782324	0.782725	0.786146	0.778364	0.777647	0.779549	0.779007
113	P. guariconensis LMG 23394	0.709148	0.745775	0.745902	0.745551	0.744664	0.743695	0.740159	0.732726	0.732187	0.735999	0.7339	0.739332	0.745162	0.747271	0.74036	0.750352	0.749242	0.748621	0.7455	0.74473	0.760556	0.777781	0.775347	0.783135	0.782993	0.783622	0.779622	0.777801	0.777665	0.781098	0.778604	0.776462	0.782528	0.772952	0.772147	0.773785	0.773838	0.76486	0.765202	0.77711	0.77854	0.778896	0.779063	0.782297	0.775117	0.774688	0.775982	0.776889
114	RW5S2*	0.70895	0.748022	0.747431	0.749056	0.745875	0.744807	0.742065	0.73528	0.734351	0.734447	0.737245	0.741628	0.748438	0.753416	0.743816	0.755518	0.753505	0.752197	0.748636	0.747807	0.765446	0.784591	0.783723	0.792756	0.792988	0.793945	0.789433	0.785427	0.786556	0.790287	0.785856	0.782988	0.787913	0.779024	0.778972	0.781087	0.780666	0.77019	0.770312	0.788958	0.789235	0.789198	0.788497	0.790566	0.783387	0.78075	0.783785	0.782085
115	P. mosselii ATCC BAA-99	0.710207	0.747271	0.746669	0.74613	0.745708	0.743381	0.739914	0.733265	0.732438	0.733405	0.750793	0.740283	0.748031	0.750717	0.742531	0.76263	0.752386	0.750093	0.747227	0.747196	0.764424	0.783654	0.782664	0.791403	0.789627	0.792103	0.78797	0.784802	0.787774	0.790285	0.783842	0.781677	0.788212	0.777993	0.777061	0.779473	0.779605	0.769231	0.769362	0.788016	0.787526	0.787022	0.786704	0.789511	0.782487	0.779794	0.782776	0.781206
116	P. mosselii BW11M1*	0.709148	0.745409	0.744377	0.746131	0.744463	0.742377	0.739871	0.734401	0.733417	0.733068	0.734708	0.739749	0.746685	0.750598	0.739999	0.752855	0.749929	0.748925	0.746634	0.746573	0.763622	0.783514	0.782333	0.791424	0.791401	0.7921	0.78915	0.785625	0.784975	0.790019	0.785421	0.78131	0.787813	0.777808	0.777842	0.781192	0.780764	0.768826	0.769152	0.787999	0.788528	0.788684	0.788211	0.789328	0.782568	0.780339	0.783246	0.782579
117	BW18S1*	0.711341	0.747855	0.747525	0.749913	0.747663	0.746532	0.743311	0.736282	0.736243	0.737427	0.737442	0.743897	0.748822	0.752623	0.744733	0.755616	0.753827	0.751984	0.748785	0.749114	0.766929	0.786851	0.784048	0.793376	0.79353	0.793979	0.791331	0.785575	0.786973	0.792257	0.787156	0.782875	0.788902	0.78095	0.781134	0.782722	0.783229	0.77134	0.771056	0.790079	0.792258	0.790032	0.790386	0.79119	0.783121	0.781751	0.783909	0.783482
118	RW9S1A*	0.710796	0.74702	0.748151	0.749898	0.747149	0.745354	0.743189	0.735873	0.735848	0.737198	0.737277	0.744134	0.749059	0.753446	0.74443	0.7566	0.753466	0.752559	0.749945	0.749268	0.766511	0.783954	0.78382	0.791943	0.792496	0.792885	0.789209	0.78593	0.78655	0.790627	0.787526	0.782723	0.789327	0.781993	0.782175	0.782758	0.782382	0.772443	0.772699	0.788923	0.789941	0.78974	0.788998	0.791138	0.784261	0.781021	0.784733	0.78429
119	P. soli LMG 27941	0.708831	0.744824	0.743888	0.746104	0.74492	0.742552	0.739863	0.731652	0.732655	0.734256	0.731962	0.739568	0.745511	0.748972	0.739552	0.751087	0.751191	0.749117	0.745224	0.746872	0.763589	0.781319	0.780487	0.788445	0.789106	0.788827	0.786211	0.782483	0.783526	0.787562	0.783293	0.779299	0.786697	0.776822	0.776767	0.77725	0.778548	0.768212	0.768061	0.784949	0.786448	0.786042	0.785222	0.787234	0.779998	0.778115	0.780251	0.779605
120	BW13M1*	0.708001	0.746572	0.747386	0.748566	0.74684	0.745559	0.742575	0.733582	0.735452	0.73439	0.73689	0.741998	0.748839	0.751954	0.742467	0.755305	0.752997	0.751873	0.748695	0.749496	0.766165	0.78698	0.785697	0.795739	0.795792	0.796747	0.792401	0.787548	0.788435	0.79291	0.788451	0.784087	0.791921	0.781387	0.781623	0.783301	0.783772	0.771649	0.771562	0.790296	0.790582	0.791539	0.790028	0.791591	0.784051	0.781313	0.78471	0.78352
121	BW16M2*	0.709326	0.747177	0.747534	0.748779	0.747643	0.745957	0.742879	0.734567	0.73441	0.734452	0.736066	0.742653	0.747959	0.751709	0.742109	0.75641	0.752301	0.751147	0.749849	0.74896	0.766748	0.786302	0.78617	0.795593	0.795311	0.796491	0.793563	0.788864	0.788944	0.792879	0.789301	0.785389	0.792884	0.782193	0.781839	0.78441	0.784174	0.771949	0.772293	0.789998	0.792749	0.790969	0.791615	0.792113	0.78465	0.782141	0.784401	0.78441
122	P. entomophila L48	0.708506	0.747612	0.74842	0.750314	0.748861	0.746589	0.744564	0.736531	0.735751	0.739057	0.738339	0.743988	0.749703	0.753765	0.744677	0.755575	0.753056	0.753112	0.749913	0.750917	0.767462	0.784056	0.782806	0.791246	0.792604	0.792676	0.788928	0.786281	0.787231	0.789305	0.788012	0.783524	0.789799	0.780235	0.780276	0.781031	0.78183	0.772424	0.772879	0.788825	0.789255	0.787821	0.788447	0.790091	0.782358	0.779791	0.783124	0.783448
123	RW2S1*	0.712931	0.745045	0.744141	0.745225	0.743079	0.742775	0.739487	0.733197	0.734568	0.73536	0.735423	0.739605	0.743892	0.74734	0.739632	0.74897	0.748759	0.745864	0.745152	0.744871	0.759851	0.773438	0.774313	0.781377	0.781171	0.781243	0.778638	0.776914	0.777392	0.779835	0.776994	0.775173	0.779202	0.771433	0.771201	0.772573	0.770508	0.765603	0.765107	0.777049	0.77818	0.777541	0.777455	0.780508	0.774349	0.773305	0.774988	0.774371
124	P. taiwanensis DSM 21245	0.709819	0.742988	0.742289	0.743077	0.742873	0.74141	0.738073	0.732509	0.730768	0.731477	0.732372	0.736713	0.742019	0.746904	0.737543	0.748307	0.746962	0.744746	0.742208	0.743148	0.759496	0.773669	0.774313	0.781845	0.781246	0.782087	0.779072	0.776091	0.776899	0.779596	0.778447	0.775411	0.779652	0.771215	0.771329	0.772056	0.77106	0.764724	0.764764	0.776038	0.776563	0.775559	0.775496	0.779405	0.773666	0.773195	0.774398	0.773675
125	RW7P2*	0.710904	0.742751	0.743235	0.744043	0.743104	0.742146	0.736956	0.731062	0.731547	0.733493	0.732144	0.738606	0.743451	0.746318	0.738637	0.747966	0.74733	0.744661	0.743666	0.744093	0.758189	0.773609	0.773338	0.78109	0.779983	0.780678	0.777727	0.776198	0.776037	0.778932	0.778021	0.77524	0.779626	0.771015	0.770805	0.77052	0.769325	0.765607	0.765629	0.77584	0.77632	0.777024	0.776297	0.780016	0.774069	0.773355	0.774564	0.775362
126	P. plecoglossicida CIP 106493	0.708786	0.746144	0.745528	0.746825	0.745691	0.744438	0.739464	0.733221	0.733382	0.735199	0.732776	0.739522	0.745623	0.748349	0.739948	0.751415	0.749231	0.748162	0.745946	0.746995	0.762301	0.781487	0.779903	0.786981	0.788397	0.787972	0.785217	0.781411	0.782278	0.785385	0.782962	0.779331	0.786614	0.776383	0.77651	0.778346	0.779117	0.768401	0.769329	0.783856	0.78451	0.783999	0.784564	0.78821	0.779616	0.778692	0.78039	0.779499
127	RW4S2*	0.713103	0.74646	0.745652	0.747271	0.746375	0.743798	0.740479	0.734437	0.733509	0.736083	0.734159	0.740456	0.746701	0.749931	0.741817	0.752891	0.750532	0.749556	0.74593	0.746881	0.763305	0.778675	0.779151	0.785997	0.785607	0.786344	0.784718	0.781809	0.782446	0.784002	0.781495	0.778589	0.786004	0.776093	0.776043	0.776457	0.777289	0.76782	0.767588	0.781999	0.783605	0.783577	0.783944	0.78616	0.779737	0.777916	0.779478	0.77935
128	RW10S1*	0.71104	0.74025	0.739934	0.740767	0.738365	0.737314	0.735218	0.72837	0.729256	0.73037	0.729598	0.733543	0.739979	0.742347	0.735109	0.743924	0.744056	0.74062	0.739115	0.741362	0.756204	0.767065	0.76668	0.773363	0.773422	0.773322	0.771668	0.769459	0.769686	0.772532	0.769848	0.768376	0.772225	0.765685	0.765677	0.765361	0.765627	0.759448	0.75947	0.769026	0.768921	0.769456	0.770067	0.773754	0.769728	0.768563	0.769435	0.768829
129	SWRI10*	0.716379	0.747561	0.747603	0.748664	0.747505	0.745649	0.742557	0.736648	0.736715	0.738487	0.735349	0.742533	0.746899	0.750517	0.743667	0.751851	0.750365	0.748338	0.749629	0.749328	0.763004	0.775723	0.775967	0.780844	0.781418	0.780941	0.779673	0.777235	0.778216	0.779801	0.777964	0.775968	0.780082	0.77284	0.772233	0.774629	0.774078	0.766905	0.767625	0.779418	0.780604	0.780837	0.78037	0.782514	0.777642	0.775702	0.777436	0.776642
130	P. reidholzensis CCOS 865	0.709929	0.745936	0.745821	0.747017	0.745289	0.743229	0.741465	0.733493	0.735766	0.736476	0.733694	0.742062	0.746549	0.750644	0.741994	0.75223	0.749155	0.749192	0.746626	0.748605	0.765443	0.781331	0.779794	0.787113	0.787043	0.786955	0.785366	0.782925	0.782177	0.786012	0.781375	0.779419	0.784954	0.776607	0.776249	0.779536	0.77839	0.769132	0.769031	0.785048	0.785555	0.784679	0.785833	0.787533	0.780234	0.778711	0.780474	0.779234
131	SWRI56*	0.712089	0.742727	0.742233	0.743384	0.740315	0.739416	0.7374	0.731627	0.731359	0.732449	0.731295	0.736526	0.740613	0.743983	0.736891	0.745956	0.744144	0.742542	0.742687	0.743859	0.760385	0.771853	0.771348	0.776345	0.775292	0.77639	0.77642	0.773357	0.774226	0.775221	0.772085	0.771659	0.774795	0.768081	0.76747	0.769345	0.770074	0.762621	0.762434	0.774445	0.775285	0.775163	0.776606	0.778223	0.773452	0.772445	0.77386	0.772976
132	P. cremoricolorata DSM 17059	0.709642	0.744152	0.743551	0.745797	0.74434	0.741348	0.739617	0.733346	0.732515	0.734741	0.732653	0.738263	0.743686	0.747547	0.739336	0.750796	0.748553	0.745184	0.746009	0.74639	0.761983	0.776866	0.775847	0.783025	0.783729	0.783246	0.782023	0.779332	0.779338	0.782168	0.778022	0.775324	0.780662	0.773515	0.773624	0.775603	0.775762	0.765846	0.76595	0.780648	0.781126	0.78014	0.78252	0.782555	0.777993	0.776899	0.77808	0.777644
133	SWRI107*	0.713182	0.744637	0.744696	0.746146	0.743883	0.743623	0.741114	0.735035	0.734717	0.735247	0.735329	0.740153	0.745764	0.748788	0.740397	0.750323	0.747481	0.746672	0.745713	0.746856	0.762637	0.774057	0.775189	0.780925	0.780682	0.780743	0.780363	0.777054	0.77809	0.780637	0.777403	0.775731	0.780127	0.773683	0.773292	0.77361	0.773175	0.766322	0.766133	0.778745	0.78018	0.779027	0.779719	0.782844	0.775808	0.774294	0.776561	0.775626
134	SWRI51*	0.713037	0.74493	0.744478	0.746148	0.743637	0.74243	0.741119	0.734428	0.733995	0.735482	0.734675	0.739824	0.745424	0.747739	0.741007	0.750077	0.748519	0.746684	0.746329	0.7483	0.763097	0.775551	0.777593	0.782273	0.782415	0.782635	0.781005	0.778723	0.778936	0.781755	0.779164	0.775547	0.781039	0.77284	0.772673	0.772662	0.772498	0.767079	0.767165	0.779633	0.779433	0.780194	0.781153	0.783664	0.776805	0.775299	0.777134	0.777293
135	P. donghuensis HYS	0.712344	0.743686	0.74355	0.745904	0.744078	0.742375	0.73996	0.733261	0.732826	0.734095	0.733685	0.739192	0.745033	0.74839	0.739949	0.750065	0.748261	0.746749	0.74536	0.74568	0.764421	0.778681	0.778087	0.78498	0.784614	0.78536	0.783715	0.781081	0.780141	0.78301	0.779456	0.779097	0.782804	0.773719	0.772836	0.775941	0.77646	0.766957	0.767197	0.779345	0.779686	0.781029	0.781773	0.784942	0.779281	0.777761	0.778907	0.77892
136	P. vranovensis DSM 16006	0.712467	0.740876	0.740284	0.742047	0.74003	0.738937	0.735389	0.730914	0.730162	0.732054	0.731052	0.735925	0.74187	0.743724	0.737791	0.74575	0.744155	0.74317	0.740703	0.742454	0.760865	0.772261	0.772216	0.77831	0.778221	0.778286	0.775318	0.773391	0.773402	0.776183	0.775439	0.77472	0.779111	0.768964	0.768286	0.770396	0.771869	0.763482	0.763831	0.77306	0.77573	0.775473	0.775671	0.780039	0.774464	0.772691	0.774507	0.774778
137	P. wadenswillerensis CCOS 864	0.713134	0.747027	0.746601	0.747382	0.746682	0.745196	0.743019	0.736052	0.736454	0.739058	0.736909	0.742869	0.747582	0.750601	0.742811	0.751916	0.749356	0.749414	0.747877	0.747396	0.767231	0.779896	0.779183	0.7866	0.786292	0.786335	0.784041	0.782118	0.782154	0.784372	0.78093	0.779383	0.784087	0.77618	0.775746	0.777986	0.778902	0.769413	0.769501	0.781234	0.783163	0.782927	0.784559	0.786618	0.781906	0.780017	0.781663	0.780648
138	P. alkylphenolica JCM 16553	0.714005	0.746987	0.746752	0.751939	0.746627	0.745039	0.74332	0.737217	0.735866	0.740423	0.739281	0.743996	0.746131	0.750648	0.745851	0.749911	0.747326	0.748051	0.75192	0.748972	0.764261	0.775357	0.773632	0.777465	0.778047	0.778897	0.777115	0.775791	0.775855	0.777867	0.775142	0.775271	0.779752	0.771526	0.771386	0.774237	0.773812	0.767944	0.769005	0.776336	0.776978	0.778378	0.778457	0.783606	0.781439	0.776277	0.777672	0.777407
139	P. japonica JCM 21532	0.709298	0.745967	0.746023	0.746665	0.746046	0.743216	0.740732	0.734118	0.734515	0.735628	0.735486	0.742145	0.748277	0.751171	0.7433	0.754272	0.751569	0.749513	0.748709	0.744981	0.766217	0.786361	0.783224	0.792077	0.791731	0.793038	0.79028	0.787227	0.786145	0.790579	0.78631	0.782437	0.789307	0.77824	0.777562	0.781762	0.781916	0.768938	0.769276	0.784782	0.787795	0.786861	0.788649	0.788698	0.783945	0.781625	0.784036	0.782769
140	P. qingdaonensis JJ3	0.71015	0.744859	0.74679	0.746526	0.746927	0.744252	0.741451	0.733669	0.73509	0.736187	0.7351	0.742025	0.746529	0.750241	0.743358	0.752796	0.750481	0.748566	0.747344	0.748525	0.766548	0.78281	0.78089	0.789051	0.787878	0.789479	0.786831	0.783307	0.782847	0.788131	0.785072	0.782285	0.788376	0.777015	0.777153	0.780623	0.780703	0.769554	0.769705	0.785535	0.786001	0.786364	0.787128	0.788475	0.782319	0.780523	0.782854	0.782138
141	P. coleopterorum CECT 8695	0.709957	0.746685	0.746659	0.747686	0.746637	0.745159	0.743261	0.737453	0.736069	0.738903	0.736989	0.742012	0.74633	0.74892	0.741277	0.751206	0.75073	0.749842	0.74628	0.748316	0.764582	0.776234	0.773503	0.779769	0.780897	0.780412	0.779093	0.776223	0.777891	0.778394	0.778825	0.774991	0.77807	0.772238	0.77219	0.774227	0.775191	0.766841	0.767043	0.778589	0.777841	0.778164	0.779029	0.782657	0.776391	0.775214	0.777388	0.776152
142	P. rhizosphaerae LMG 21640	0.708684	0.747949	0.748095	0.748521	0.746632	0.745353	0.743684	0.737413	0.737826	0.741202	0.73844	0.741962	0.747325	0.749637	0.742775	0.750959	0.749925	0.748057	0.747101	0.748121	0.766005	0.775793	0.773679	0.779671	0.780429	0.781134	0.778141	0.776623	0.776581	0.779936	0.776984	0.775849	0.779214	0.773788	0.773841	0.774567	0.774252	0.768342	0.768286	0.776606	0.776721	0.77718	0.77817	0.784094	0.777496	0.776488	0.777868	0.777716
143	P. savastanoi LMG 2209	0.7115	0.736441	0.736688	0.738506	0.737293	0.735574	0.733751	0.730351	0.728198	0.729389	0.729613	0.734017	0.734493	0.736429	0.731486	0.738069	0.737673	0.737286	0.736731	0.737762	0.754601	0.758073	0.759044	0.761403	0.761549	0.761958	0.761626	0.760483	0.760364	0.762175	0.760997	0.762032	0.762352	0.756278	0.75575	0.75693	0.757878	0.752941	0.753658	0.758062	0.759705	0.760887	0.7618	0.764308	0.762253	0.761254	0.762196	0.761782
144	P. tremae LMG 22121	0.71143	0.73575	0.736165	0.737349	0.736108	0.734071	0.732838	0.728171	0.728294	0.730961	0.728227	0.733114	0.734167	0.735241	0.731631	0.736528	0.735303	0.735818	0.734985	0.736366	0.752682	0.75664	0.757411	0.758579	0.75919	0.758605	0.758728	0.757785	0.757674	0.760841	0.759525	0.759479	0.759578	0.756043	0.755762	0.75552	0.756075	0.752072	0.752298	0.757619	0.758226	0.759006	0.759158	0.762993	0.760127	0.759385	0.759446	0.759487
145	P. amygdali LMG 13184	0.711243	0.737397	0.736738	0.738622	0.737121	0.735248	0.732815	0.729795	0.728492	0.730961	0.728287	0.734518	0.736003	0.737489	0.733065	0.737765	0.737692	0.737549	0.736936	0.737273	0.753811	0.758191	0.759859	0.760921	0.760944	0.760608	0.761719	0.76058	0.759995	0.761009	0.760577	0.762484	0.761902	0.756454	0.756507	0.757473	0.758231	0.753701	0.753577	0.759649	0.759465	0.76109	0.761611	0.764268	0.762032	0.760629	0.761558	0.761826
146	P. ficuserectae CCUG 32779	0.711804	0.736703	0.736829	0.738251	0.737731	0.73477	0.733776	0.728467	0.72929	0.730041	0.728048	0.733137	0.735129	0.736483	0.730995	0.735982	0.736778	0.736645	0.736069	0.738188	0.754658	0.757754	0.759456	0.76182	0.761397	0.761189	0.762487	0.760602	0.759439	0.760219	0.759805	0.76111	0.76227	0.75596	0.755637	0.757014	0.756556	0.75347	0.753729	0.758808	0.758916	0.76049	0.760809	0.764011	0.761987	0.761824	0.76225	0.761965
147	P. meliae ICMP 6289	0.71235	0.735717	0.735879	0.736978	0.736306	0.733715	0.732538	0.728547	0.728332	0.729671	0.729094	0.733821	0.734735	0.735944	0.732259	0.738026	0.736511	0.737306	0.73626	0.737528	0.754122	0.758181	0.759404	0.761915	0.761942	0.761398	0.762167	0.760335	0.759453	0.760986	0.760059	0.760826	0.761361	0.757303	0.757013	0.757372	0.758144	0.752937	0.7535	0.758885	0.759524	0.761274	0.76225	0.764123	0.762735	0.76136	0.762667	0.76185
148	P. caricapapayae LMG 2152	0.710915	0.737926	0.737417	0.738186	0.737814	0.736964	0.734504	0.728376	0.729829	0.730978	0.730043	0.73397	0.735909	0.737759	0.732792	0.736197	0.737346	0.736448	0.737714	0.736582	0.752933	0.757073	0.758035	0.759746	0.759655	0.760001	0.760812	0.759061	0.758352	0.761084	0.759076	0.759625	0.760176	0.756938	0.756664	0.756934	0.756483	0.753633	0.753532	0.758299	0.759721	0.760218	0.75995	0.763249	0.760041	0.759111	0.760901	0.759302
149	P. cerasi LMG 28609	0.711677	0.740391	0.740891	0.742128	0.742698	0.739912	0.737514	0.734845	0.733216	0.733404	0.732665	0.739052	0.739836	0.741952	0.736795	0.741945	0.742942	0.743502	0.742603	0.741894	0.758953	0.762079	0.761585	0.765153	0.765868	0.765961	0.766835	0.764594	0.765038	0.765673	0.764162	0.764475	0.765969	0.763518	0.763123	0.761593	0.762464	0.759466	0.759974	0.764588	0.765631	0.766054	0.767592	0.76911	0.767267	0.765287	0.767183	0.765958
150	P. syringae pv. syringae NCPPB 281	0.712128	0.739516	0.739667	0.740308	0.739296	0.737168	0.735121	0.730499	0.730934	0.732417	0.730282	0.735953	0.73705	0.740182	0.73498	0.741395	0.740152	0.739212	0.739018	0.739137	0.757031	0.761444	0.762806	0.765047	0.76478	0.76542	0.766533	0.764736	0.76445	0.766119	0.764648	0.764873	0.766972	0.761788	0.761192	0.761002	0.76094	0.75666	0.757189	0.763724	0.764585	0.764785	0.76569	0.769247	0.766149	0.765182	0.765868	0.764996
151	P. congelans LMG 21466	0.711369	0.738163	0.738485	0.739334	0.73914	0.736511	0.735172	0.730833	0.730595	0.732366	0.731137	0.735442	0.738422	0.739831	0.735257	0.741361	0.740894	0.73982	0.740193	0.740441	0.756273	0.761036	0.762726	0.764862	0.764595	0.76551	0.766225	0.763898	0.763642	0.766102	0.764349	0.76367	0.764706	0.759319	0.758871	0.760692	0.760395	0.75755	0.757498	0.762141	0.764007	0.764335	0.764716	0.768664	0.765392	0.763722	0.765027	0.764179
152	P. coronafaciens LMG 5060	0.716402	0.740732	0.740117	0.742407	0.740898	0.738771	0.737505	0.733941	0.731763	0.733305	0.732618	0.737182	0.739911	0.741948	0.737172	0.7421	0.741993	0.741579	0.740957	0.74106	0.756285	0.760463	0.761086	0.763377	0.763618	0.763171	0.764233	0.762692	0.762229	0.763981	0.763531	0.763038	0.76371	0.759757	0.760051	0.760329	0.761164	0.756418	0.756443	0.76088	0.762354	0.762747	0.762968	0.766546	0.763918	0.763576	0.763636	0.764258
153	P. avellanae CIP 105176	0.714965	0.740751	0.740139	0.742593	0.741334	0.739068	0.738162	0.734164	0.731001	0.733609	0.733152	0.737312	0.739712	0.74299	0.737167	0.743112	0.74242	0.741589	0.741826	0.741217	0.757535	0.763439	0.764658	0.767359	0.766597	0.767304	0.767576	0.765279	0.764769	0.766855	0.76628	0.765902	0.767567	0.761565	0.760964	0.762084	0.763129	0.757676	0.757594	0.764505	0.766045	0.766154	0.767422	0.769566	0.766601	0.765761	0.766422	0.766485
154	P. cannabina LMG 5096	0.713266	0.738833	0.73947	0.740528	0.739338	0.737602	0.735075	0.73017	0.728611	0.732119	0.729181	0.734399	0.737955	0.739069	0.734027	0.737369	0.739892	0.737324	0.738001	0.739138	0.756728	0.760893	0.761505	0.763813	0.764032	0.76512	0.765649	0.763462	0.762871	0.764773	0.763209	0.763834	0.765044	0.760592	0.76037	0.76007	0.759878	0.756537	0.756561	0.763026	0.762339	0.764647	0.763553	0.768892	0.764791	0.764464	0.764961	0.765069
155	P. floridensis GEV388	0.711398	0.738835	0.738816	0.739498	0.739813	0.737502	0.735122	0.72963	0.730126	0.73084	0.730594	0.735787	0.737493	0.739186	0.735114	0.73847	0.740694	0.739336	0.737755	0.739135	0.755778	0.760653	0.761863	0.764418	0.764232	0.764734	0.765447	0.763367	0.763384	0.764776	0.764739	0.763288	0.764905	0.760637	0.760367	0.759972	0.759941	0.755166	0.755675	0.762686	0.761638	0.763403	0.764051	0.767659	0.764267	0.763587	0.764128	0.763859
156	P. viridiflava ATCC 13223	0.711898	0.740011	0.739521	0.740197	0.73946	0.73748	0.735181	0.729867	0.73099	0.731825	0.729862	0.735469	0.739026	0.739439	0.736345	0.741175	0.740637	0.740306	0.738362	0.740257	0.755574	0.762196	0.763781	0.766107	0.765198	0.766279	0.767145	0.763519	0.764531	0.7668	0.766486	0.765558	0.766566	0.759955	0.759851	0.762159	0.76115	0.756086	0.755982	0.763578	0.76318	0.764432	0.764196	0.767894	0.765708	0.764511	0.765427	0.7657
157	P. asturiensis LMG 26898	0.712142	0.737809	0.737712	0.73946	0.73786	0.735636	0.733803	0.729811	0.731062	0.732049	0.730534	0.733488	0.737266	0.739384	0.733535	0.739422	0.739707	0.738761	0.739096	0.739467	0.756573	0.760383	0.761916	0.765067	0.765041	0.765024	0.765386	0.763463	0.763044	0.764902	0.764764	0.764773	0.765268	0.759498	0.759799	0.760097	0.759342	0.756664	0.757	0.762289	0.762518	0.763726	0.764378	0.766488	0.763705	0.762824	0.764229	0.764238
158	P. cichorii ATCC 10857	0.713603	0.739276	0.73882	0.7428	0.739863	0.737956	0.735798	0.730916	0.731464	0.733009	0.732152	0.738441	0.73969	0.740672	0.734995	0.741254	0.740836	0.740531	0.738717	0.737712	0.756876	0.759227	0.761067	0.762125	0.761577	0.762342	0.763438	0.76197	0.761933	0.763485	0.76464	0.764862	0.763563	0.759233	0.758585	0.7594	0.758439	0.754475	0.754758	0.760929	0.760811	0.763047	0.761518	0.764684	0.763615	0.763981	0.7645	0.764502
159	P. caspiana FBF102	0.712597	0.733015	0.732338	0.733997	0.734028	0.7322	0.729587	0.726055	0.726142	0.72573	0.726246	0.731095	0.732209	0.73334	0.730717	0.734071	0.733529	0.732072	0.731303	0.735176	0.749924	0.751172	0.751982	0.75284	0.753613	0.752543	0.753886	0.753716	0.753262	0.753576	0.754375	0.755546	0.755708	0.751198	0.750628	0.749922	0.749483	0.748127	0.748216	0.752986	0.75223	0.753743	0.753795	0.758173	0.756762	0.755773	0.75615	0.755855
160	P. abietaniphila ATCC 700689	0.711285	0.73949	0.737511	0.74024	0.736905	0.738107	0.733417	0.731202	0.727687	0.72942	0.734688	0.733198	0.737107	0.739694	0.732791	0.74452	0.736982	0.739452	0.739069	0.739733	0.75245	0.760003	0.761265	0.763539	0.763649	0.763537	0.764611	0.761505	0.763138	0.762697	0.761555	0.761531	0.764227	0.758185	0.758347	0.757459	0.758159	0.752957	0.753366	0.759949	0.760308	0.760902	0.761918	0.766187	0.762418	0.761346	0.762407	0.762282
161	P. bohemica IA19	0.711041	0.737557	0.737792	0.740458	0.739032	0.737925	0.733244	0.730132	0.731327	0.730423	0.729987	0.734924	0.738198	0.740075	0.733807	0.740167	0.738869	0.738196	0.737232	0.741212	0.756123	0.76166	0.764296	0.765914	0.766475	0.76627	0.767054	0.764579	0.764988	0.76619	0.764846	0.765308	0.766108	0.759853	0.759894	0.760257	0.759844	0.754817	0.755034	0.763713	0.763568	0.764318	0.765944	0.769275	0.765053	0.765296	0.765282	0.765423
162	P. graminis LMG 21661	0.710531	0.736497	0.736803	0.737195	0.736623	0.735274	0.732667	0.727247	0.727847	0.729055	0.729025	0.73353	0.735666	0.737708	0.731788	0.739068	0.737529	0.738204	0.736141	0.738807	0.753685	0.762706	0.76298	0.767155	0.766486	0.766474	0.76691	0.764029	0.764312	0.765292	0.764113	0.764413	0.766731	0.75885	0.758645	0.759707	0.760583	0.754239	0.754116	0.76379	0.762872	0.764199	0.763725	0.768	0.764564	0.76397	0.764772	0.765096
163	P. lutea DSM 17257	0.711478	0.740852	0.741467	0.742734	0.74253	0.741778	0.737449	0.734578	0.732654	0.736007	0.734659	0.738481	0.739718	0.741608	0.737859	0.742488	0.739973	0.7417	0.739736	0.742251	0.75613	0.761202	0.761719	0.762976	0.764847	0.76489	0.764075	0.762414	0.763013	0.763356	0.762864	0.762707	0.765067	0.760717	0.760608	0.759704	0.761074	0.756813	0.757059	0.764705	0.762862	0.76481	0.765643	0.767489	0.763894	0.76142	0.764404	0.763599
164	P. asplenii LMG 2137	0.712188	0.74381	0.744095	0.746403	0.745265	0.743724	0.741245	0.737666	0.735714	0.738097	0.737484	0.743332	0.745618	0.749233	0.742082	0.751306	0.74815	0.747577	0.744833	0.745232	0.766879	0.776356	0.774112	0.779781	0.780397	0.781944	0.779661	0.779497	0.777952	0.779633	0.778236	0.776291	0.778496	0.773365	0.77283	0.775838	0.776195	0.767392	0.767037	0.776982	0.778726	0.778338	0.779307	0.781472	0.776092	0.775266	0.777041	0.776184
165	P. fuscovaginae LMG 2158	0.712534	0.747257	0.746634	0.749273	0.748055	0.747584	0.742871	0.738995	0.73751	0.740597	0.738932	0.744785	0.74942	0.753189	0.745644	0.752966	0.750362	0.750628	0.747645	0.746487	0.767476	0.777553	0.774068	0.779685	0.779674	0.781581	0.77927	0.778589	0.777581	0.780528	0.779175	0.776454	0.77928	0.774342	0.774042	0.775511	0.775292	0.769344	0.768741	0.778541	0.778892	0.778981	0.779425	0.782638	0.778046	0.776173	0.777681	0.777565
166	RW8P3*	0.713561	0.74613	0.746451	0.749164	0.749147	0.746035	0.742481	0.737676	0.739672	0.740179	0.738478	0.744102	0.749147	0.752245	0.743266	0.753073	0.751391	0.749619	0.747954	0.746509	0.769404	0.781195	0.779611	0.786211	0.786289	0.787388	0.786688	0.783556	0.78352	0.788335	0.785676	0.782998	0.786324	0.77759	0.777064	0.78102	0.78153	0.770917	0.771649	0.783981	0.785102	0.785837	0.786265	0.787446	0.780575	0.779653	0.780845	0.780812
167	P. agarici ATCC 25941	0.710009	0.739562	0.73956	0.739797	0.739025	0.738261	0.735606	0.731016	0.730749	0.731687	0.731255	0.73597	0.741848	0.743145	0.737508	0.744375	0.742615	0.741516	0.739456	0.740225	0.75817	0.768744	0.767087	0.77159	0.771604	0.771096	0.77271	0.770399	0.769206	0.770671	0.770414	0.768341	0.771776	0.764715	0.764452	0.766346	0.766864	0.760533	0.760846	0.765982	0.767009	0.767422	0.768013	0.77422	0.769572	0.768424	0.769803	0.769008
168	P. batumici UCM B-321	0.710996	0.746076	0.746274	0.747336	0.74713	0.745521	0.741399	0.734503	0.735919	0.737126	0.734341	0.74246	0.746282	0.749356	0.741247	0.751453	0.750258	0.748233	0.746755	0.745151	0.767206	0.780545	0.77958	0.784035	0.784683	0.786269	0.784616	0.780443	0.780535	0.785014	0.781854	0.78211	0.785798	0.775388	0.774836	0.779342	0.777578	0.76855	0.768835	0.779656	0.780584	0.781223	0.78177	0.785665	0.780493	0.777982	0.77969	0.78076
169	P. protegens DSM 19095	0.71279	0.745233	0.74587	0.747583	0.747393	0.743597	0.743755	0.737196	0.735157	0.738667	0.737428	0.742879	0.748137	0.751872	0.741504	0.751894	0.749899	0.748692	0.746711	0.747381	0.76676	0.778471	0.777104	0.782958	0.784088	0.783641	0.781788	0.780783	0.779965	0.783304	0.78258	0.780229	0.783985	0.774335	0.774382	0.778112	0.778219	0.768673	0.768739	0.779794	0.77946	0.780721	0.782531	0.784545	0.779385	0.777326	0.779763	0.779136
170	P. saponiphila DSM 9751	0.71146	0.743261	0.745773	0.742555	0.745775	0.742283	0.74253	0.750672	0.736455	0.73884	0.73716	0.742559	0.748373	0.749888	0.743248	0.750463	0.748953	0.748746	0.740604	0.746714	0.766667	0.777941	0.776056	0.782289	0.784088	0.784019	0.794294	0.77921	0.777896	0.780238	0.78396	0.779677	0.785283	0.773195	0.772767	0.776235	0.775849	0.76896	0.769128	0.77729	0.778004	0.779412	0.780233	0.780206	0.773831	0.772085	0.780142	0.778889
171	P. chlororaphis subsp. aurantiaca LMG 21630	0.71211	0.746706	0.748243	0.748827	0.747894	0.74605	0.745055	0.737068	0.739045	0.740017	0.739699	0.745048	0.749499	0.751602	0.744242	0.753416	0.751409	0.750103	0.749472	0.750732	0.769165	0.782178	0.780023	0.786073	0.786616	0.786923	0.786102	0.782935	0.783428	0.785435	0.784904	0.783618	0.785835	0.775672	0.775758	0.779724	0.778787	0.769548	0.769233	0.781004	0.782148	0.781234	0.783378	0.787371	0.782242	0.779773	0.782085	0.781333
172	P. chlororaphis subsp. aureofaciens LMG 1245	0.71264	0.745296	0.74644	0.746971	0.746015	0.743818	0.743289	0.73687	0.73662	0.738579	0.737208	0.743435	0.747238	0.750427	0.741927	0.751972	0.747582	0.747507	0.747216	0.748768	0.768129	0.781114	0.778815	0.785577	0.7864	0.786163	0.785998	0.781396	0.781726	0.78332	0.783973	0.782052	0.785196	0.774995	0.774999	0.778448	0.778284	0.767951	0.768033	0.781314	0.780921	0.781068	0.783048	0.785756	0.780987	0.779258	0.781806	0.781724
173	P. chlororaphis subsp. chlororaphis DSM 50083	0.712389	0.74461	0.745712	0.748329	0.746657	0.744361	0.742436	0.735501	0.735955	0.738353	0.736841	0.742536	0.747904	0.750045	0.742529	0.751384	0.748988	0.748199	0.748665	0.74721	0.767323	0.781941	0.777055	0.784887	0.785772	0.784527	0.783343	0.781274	0.781071	0.783057	0.7835	0.780972	0.785188	0.77532	0.774969	0.778865	0.777544	0.767737	0.767777	0.778994	0.779664	0.77982	0.781056	0.785358	0.779767	0.7777	0.779867	0.780334
174	P. chlororaphis subsp. piscium DSM 21509	0.713232	0.746157	0.745968	0.748885	0.746064	0.744339	0.743054	0.734462	0.736566	0.739885	0.737698	0.744289	0.747598	0.75013	0.7418	0.751757	0.748573	0.747879	0.748167	0.74808	0.768878	0.780965	0.778232	0.78424	0.785271	0.784512	0.783388	0.782019	0.781081	0.782647	0.783775	0.781426	0.784164	0.775045	0.774443	0.776676	0.776155	0.768573	0.768187	0.779355	0.779401	0.781149	0.782092	0.784867	0.78034	0.777741	0.780133	0.780567
175	SWRI12*	0.711848	0.742418	0.742374	0.742681	0.742707	0.740775	0.737357	0.732178	0.732644	0.732118	0.732412	0.738469	0.741868	0.74515	0.737076	0.74604	0.743805	0.743344	0.742183	0.743184	0.761876	0.772825	0.772036	0.776205	0.77604	0.776562	0.776298	0.775094	0.774198	0.777739	0.778269	0.775593	0.777702	0.769982	0.769132	0.771728	0.771064	0.763038	0.763724	0.773359	0.773645	0.7746	0.775296	0.779087	0.77431	0.77151	0.774311	0.773864
176	SWRI179*	0.710639	0.740894	0.740137	0.740211	0.740089	0.738319	0.73569	0.731483	0.730917	0.731919	0.730551	0.737169	0.740866	0.743879	0.734881	0.745417	0.74434	0.742847	0.740742	0.742774	0.762565	0.771803	0.773396	0.776773	0.776789	0.777392	0.776103	0.77464	0.774584	0.777239	0.777367	0.775268	0.778865	0.769021	0.768636	0.770473	0.769206	0.761997	0.762048	0.772307	0.772953	0.77541	0.774392	0.778584	0.774072	0.771445	0.773611	0.774574
177	P. brassicacearum subsp. brassicacearum DSM 13227	0.711139	0.743047	0.743607	0.744893	0.743477	0.742451	0.739975	0.734128	0.732401	0.736747	0.734272	0.741441	0.743575	0.746988	0.739806	0.746922	0.74601	0.746724	0.744224	0.746106	0.763491	0.772917	0.771509	0.776781	0.776547	0.777308	0.775871	0.774305	0.773193	0.775672	0.776237	0.775357	0.777525	0.770436	0.769792	0.771337	0.770992	0.765283	0.765336	0.773539	0.773607	0.773678	0.77488	0.778656	0.774743	0.771866	0.774616	0.773441
178	P. kilonensis DSM 13647	0.710901	0.740857	0.741422	0.7425	0.741004	0.739452	0.738169	0.733422	0.730858	0.733179	0.733982	0.739465	0.742514	0.74511	0.737833	0.747141	0.745376	0.744518	0.741634	0.74393	0.762531	0.772661	0.772583	0.776713	0.776412	0.777311	0.776417	0.773629	0.77311	0.77656	0.776658	0.775072	0.777159	0.768137	0.767828	0.770721	0.769572	0.763631	0.763696	0.773419	0.773114	0.773719	0.773814	0.778602	0.774118	0.772658	0.774134	0.773596
179	SWRI108*	0.712296	0.741981	0.741235	0.741489	0.741972	0.739304	0.737264	0.732015	0.730697	0.733683	0.732557	0.738309	0.742573	0.74527	0.738293	0.747074	0.744179	0.742748	0.741859	0.742834	0.762718	0.772486	0.771687	0.776651	0.776317	0.777289	0.776486	0.774549	0.773712	0.777145	0.776768	0.774843	0.777628	0.769053	0.768802	0.771048	0.770302	0.762767	0.76341	0.773076	0.7737	0.774836	0.775005	0.778667	0.773743	0.772376	0.77417	0.773787
180	P. thivervalensis CFBP 11261	0.711868	0.742878	0.743517	0.743884	0.742597	0.741796	0.738659	0.732754	0.733126	0.734449	0.732426	0.73946	0.741303	0.745349	0.737572	0.745904	0.744089	0.743236	0.742325	0.74343	0.763432	0.772709	0.772995	0.777398	0.776851	0.777377	0.776716	0.775401	0.774606	0.777416	0.777781	0.776081	0.778987	0.769241	0.769258	0.771935	0.771771	0.762886	0.76321	0.773858	0.773982	0.775414	0.774836	0.778885	0.77396	0.772751	0.774564	0.774318
181	SWRI196*	0.714177	0.741769	0.740722	0.742122	0.742318	0.739521	0.736628	0.732547	0.731764	0.733583	0.732501	0.736993	0.741533	0.743049	0.737722	0.745145	0.7435	0.742731	0.741859	0.74217	0.760287	0.767791	0.769041	0.772186	0.772073	0.772795	0.771906	0.770594	0.770369	0.772456	0.772649	0.770399	0.772648	0.765458	0.765029	0.768177	0.767865	0.760007	0.75984	0.76921	0.769269	0.770114	0.77013	0.773844	0.771372	0.769121	0.771654	0.769884
182	SWRI92*	0.71033	0.739986	0.740656	0.741632	0.740916	0.739654	0.736463	0.731733	0.732109	0.732753	0.731472	0.737056	0.739973	0.742917	0.735798	0.743992	0.742597	0.742275	0.741025	0.742396	0.760226	0.768397	0.769187	0.772647	0.772279	0.772843	0.773013	0.770728	0.769986	0.772567	0.772184	0.77118	0.772767	0.7652	0.764922	0.767929	0.767306	0.760434	0.760366	0.768952	0.7688	0.770778	0.770596	0.773747	0.769034	0.767618	0.769498	0.769124
183	SWRI102*	0.7115	0.740244	0.740047	0.741696	0.740963	0.738522	0.737042	0.73149	0.731538	0.733451	0.731761	0.737986	0.740056	0.744536	0.736872	0.744246	0.743053	0.742226	0.741011	0.741968	0.758879	0.768445	0.769051	0.77224	0.772041	0.77269	0.772921	0.77002	0.769319	0.772157	0.772012	0.77205	0.772916	0.764699	0.764721	0.768141	0.766912	0.758508	0.758851	0.769569	0.769294	0.770257	0.771309	0.775117	0.768762	0.76682	0.768887	0.768847
184	SWRI154*	0.710374	0.738026	0.737895	0.73956	0.738404	0.736667	0.734364	0.730053	0.730779	0.731322	0.73064	0.734685	0.738696	0.743242	0.735027	0.743471	0.740283	0.740923	0.737996	0.740061	0.759053	0.767628	0.768701	0.771916	0.770983	0.772291	0.772997	0.769765	0.769535	0.77027	0.772062	0.771066	0.772704	0.763877	0.763542	0.767413	0.766508	0.758792	0.757835	0.7679	0.767948	0.770777	0.770553	0.773874	0.768905	0.767662	0.769308	0.769174
185	P. corrugata LMG 2172	0.711455	0.740432	0.740917	0.74199	0.741188	0.73808	0.737023	0.731359	0.732079	0.732886	0.731412	0.738404	0.740842	0.744062	0.737013	0.744623	0.74248	0.741739	0.739492	0.740654	0.760383	0.768971	0.769948	0.773764	0.774107	0.774287	0.772545	0.770222	0.769402	0.772545	0.773304	0.771299	0.77496	0.76519	0.765283	0.768348	0.767013	0.759957	0.759811	0.769759	0.768647	0.771132	0.771746	0.773884	0.770761	0.769245	0.770661	0.770385
186	P. mediterranea CFBP 5447	0.709654	0.744291	0.743536	0.744777	0.743452	0.742463	0.740035	0.734207	0.736292	0.737096	0.73693	0.740991	0.745104	0.748583	0.742009	0.749673	0.746194	0.746155	0.744368	0.744691	0.764763	0.775035	0.772819	0.777934	0.778173	0.778683	0.777124	0.77502	0.774993	0.777364	0.779035	0.776992	0.779723	0.771136	0.771145	0.773855	0.773032	0.765943	0.765742	0.774949	0.775884	0.77672	0.776085	0.780219	0.775118	0.772783	0.775582	0.775188
187	P. jessenii CIP 105274	0.711853	0.745839	0.746793	0.746908	0.745359	0.743814	0.741319	0.735961	0.736014	0.739015	0.737308	0.742327	0.74433	0.747478	0.7413	0.747247	0.745257	0.74672	0.743716	0.746158	0.762751	0.770341	0.769805	0.773094	0.774607	0.774348	0.773466	0.770814	0.771402	0.771974	0.770969	0.772924	0.77431	0.768014	0.767809	0.768027	0.768326	0.762934	0.763072	0.771218	0.771142	0.771094	0.771602	0.776356	0.772284	0.771361	0.77441	0.774034
188	P. laurylsulfatiphila AP3 16	0.713139	0.742378	0.741396	0.742292	0.74078	0.738159	0.7365	0.731107	0.731279	0.731893	0.731537	0.73652	0.741039	0.742637	0.736494	0.744292	0.741121	0.741765	0.73917	0.741501	0.757393	0.768876	0.768733	0.774358	0.773818	0.773988	0.772911	0.769675	0.770318	0.77209	0.77079	0.771496	0.773457	0.76438	0.764001	0.766566	0.766415	0.760278	0.760133	0.767937	0.76848	0.770857	0.770592	0.774282	0.770967	0.76931	0.771625	0.771236
189	P. laurylsulfativorans AP3 22	0.712309	0.739088	0.73974	0.741047	0.740082	0.737928	0.735369	0.730994	0.731247	0.731383	0.730501	0.736977	0.738157	0.74121	0.736111	0.742592	0.739942	0.740504	0.738484	0.741251	0.75707	0.768359	0.767919	0.771196	0.770772	0.770487	0.77003	0.769435	0.76905	0.769472	0.768933	0.769538	0.772443	0.76308	0.762535	0.763843	0.763906	0.758741	0.758793	0.76534	0.766842	0.768218	0.768116	0.773273	0.769485	0.768018	0.769899	0.770193
190	P. vancouverensis ATCC 700688	0.712631	0.743212	0.744314	0.746778	0.745418	0.743355	0.738607	0.733895	0.735534	0.735749	0.735463	0.740525	0.741525	0.746741	0.739288	0.746969	0.744259	0.74582	0.74187	0.745271	0.763339	0.769178	0.769502	0.772837	0.774058	0.77299	0.773201	0.770755	0.771098	0.771261	0.772595	0.772414	0.77477	0.766713	0.766002	0.76774	0.768258	0.763208	0.763138	0.769296	0.770799	0.772179	0.773094	0.777638	0.772795	0.770921	0.773366	0.772369
191	P. umsongensis LMG 21317	0.711815	0.743675	0.74505	0.744881	0.743412	0.741917	0.73992	0.73496	0.73399	0.737008	0.735133	0.741148	0.742309	0.747119	0.741099	0.746476	0.74292	0.745503	0.74146	0.744731	0.760223	0.768746	0.768008	0.771602	0.77286	0.77218	0.771763	0.769688	0.770438	0.770333	0.770892	0.770967	0.772017	0.765087	0.763648	0.765452	0.765942	0.761238	0.76143	0.769498	0.770554	0.77041	0.771641	0.775124	0.770779	0.769848	0.77096	0.770988
192	P. mohnii CCUG 53115	0.712001	0.74282	0.742974	0.743687	0.743249	0.740908	0.739261	0.733441	0.732508	0.735123	0.733359	0.73904	0.741903	0.744984	0.740178	0.74583	0.742981	0.744714	0.740987	0.744891	0.759389	0.767536	0.767792	0.770916	0.77265	0.772065	0.771464	0.768528	0.768498	0.767737	0.770489	0.7711	0.773091	0.764858	0.763336	0.764905	0.766106	0.759519	0.760007	0.767581	0.768194	0.767999	0.768233	0.773804	0.769427	0.76814	0.770516	0.769639
193	P. moorei CCUG 53114	0.713265	0.746412	0.746682	0.747827	0.746654	0.745999	0.745047	0.737547	0.737987	0.742637	0.738934	0.746645	0.746643	0.748879	0.74353	0.748205	0.746479	0.747905	0.745422	0.747084	0.762653	0.77112	0.768775	0.771897	0.774508	0.773552	0.772381	0.770131	0.770666	0.770524	0.771382	0.771504	0.774305	0.766895	0.765635	0.768268	0.768252	0.762872	0.762867	0.769727	0.769749	0.771405	0.771838	0.775606	0.771562	0.769547	0.771944	0.771064
194	P. reinekei CCUG 53116	0.713233	0.73995	0.739712	0.739304	0.739171	0.738108	0.735649	0.729891	0.730094	0.730871	0.731034	0.736373	0.73748	0.73994	0.734216	0.74012	0.739292	0.739476	0.737975	0.741049	0.756524	0.764157	0.765973	0.768317	0.768479	0.768904	0.769448	0.766898	0.766849	0.767164	0.767124	0.769032	0.768658	0.760797	0.760651	0.761742	0.761916	0.75718	0.757163	0.763537	0.765131	0.766075	0.76656	0.770569	0.767621	0.766468	0.76759	0.767736
195	P. fluorescens BW11P2*	0.711407	0.741356	0.741331	0.742921	0.740945	0.738771	0.736487	0.731149	0.730603	0.731631	0.730789	0.737531	0.740237	0.742783	0.73667	0.745149	0.743612	0.742331	0.74099	0.742033	0.760151	0.770055	0.77125	0.774423	0.774041	0.77368	0.774896	0.77181	0.771677	0.772823	0.77279	0.772351	0.772621	0.765704	0.765846	0.768583	0.768223	0.760489	0.759809	0.769675	0.770225	0.772196	0.773032	0.776246	0.772322	0.770867	0.771998	0.77189
196	P. kribbensis DSM 100278	0.712187	0.742482	0.743619	0.746192	0.744182	0.742044	0.740975	0.73499	0.733381	0.736717	0.734645	0.742083	0.743505	0.746122	0.738998	0.747227	0.743773	0.746052	0.743435	0.746075	0.762974	0.771177	0.771606	0.773823	0.775007	0.774703	0.776209	0.772999	0.773242	0.773298	0.773211	0.773501	0.773399	0.766967	0.766336	0.768829	0.76851	0.76252	0.761976	0.771369	0.773704	0.774552	0.775264	0.777325	0.773416	0.771729	0.774093	0.774365
197	SWRI54*	0.712823	0.739587	0.739266	0.741663	0.739929	0.738837	0.738299	0.731381	0.730789	0.732096	0.732373	0.737192	0.740334	0.742189	0.735951	0.743298	0.741499	0.740918	0.738938	0.742162	0.760033	0.769307	0.769161	0.772174	0.771832	0.772443	0.774698	0.770718	0.771093	0.772215	0.770651	0.771181	0.771853	0.763604	0.763787	0.766992	0.766367	0.760732	0.759824	0.769303	0.770424	0.77136	0.77203	0.775641	0.773282	0.77163	0.77238	0.772622
198	P. moraviensis DSM 16007	0.713401	0.742619	0.74339	0.74496	0.744068	0.742529	0.740028	0.735976	0.734234	0.737517	0.734528	0.741541	0.743564	0.745567	0.740701	0.7475	0.744847	0.744243	0.743555	0.746153	0.763155	0.770092	0.770329	0.772559	0.77356	0.773693	0.774412	0.772635	0.771553	0.772166	0.772268	0.771661	0.77308	0.766515	0.766476	0.768057	0.768188	0.762348	0.762217	0.7726	0.773073	0.773635	0.77475	0.776709	0.773353	0.77132	0.773771	0.773401
199	SWRI153*	0.711704	0.740411	0.740112	0.741891	0.740603	0.737849	0.736297	0.730482	0.730297	0.732196	0.730399	0.7371	0.739192	0.740735	0.735729	0.743036	0.740159	0.739622	0.74039	0.740433	0.757123	0.765381	0.765304	0.767382	0.767977	0.767508	0.77003	0.766026	0.766122	0.767566	0.767556	0.767139	0.768923	0.761137	0.761332	0.76354	0.762438	0.757034	0.757111	0.765454	0.766948	0.767698	0.768455	0.771617	0.76887	0.767064	0.769168	0.76774
200	SWRI99*	0.713608	0.739383	0.74037	0.740665	0.74048	0.738451	0.736459	0.731517	0.732686	0.734044	0.731421	0.738329	0.741219	0.741611	0.736009	0.743569	0.740631	0.741454	0.739818	0.741539	0.75884	0.767453	0.76727	0.770433	0.770928	0.770706	0.772543	0.769467	0.769313	0.769548	0.768869	0.768693	0.769614	0.763499	0.763083	0.764369	0.763994	0.759813	0.759309	0.767255	0.769575	0.770081	0.770404	0.772951	0.770676	0.769021	0.770102	0.770615
201	SWRI111*	0.715245	0.740543	0.741091	0.740593	0.740994	0.738692	0.736409	0.732329	0.73097	0.732204	0.732182	0.737796	0.739376	0.741419	0.736226	0.743059	0.740936	0.740318	0.740313	0.74293	0.759252	0.767636	0.766153	0.769967	0.770191	0.769719	0.772162	0.768697	0.768435	0.769468	0.768547	0.768695	0.769937	0.763669	0.763474	0.76624	0.765027	0.759157	0.758562	0.76943	0.769907	0.771461	0.77194	0.773304	0.770713	0.76971	0.770478	0.769756
202	SWRI65*	0.715346	0.739997	0.74021	0.741932	0.741871	0.739378	0.737119	0.732559	0.7321	0.733309	0.733473	0.738114	0.740478	0.740607	0.73681	0.743331	0.741892	0.74085	0.74134	0.744085	0.759676	0.76843	0.767724	0.771192	0.771329	0.77106	0.773042	0.769297	0.770305	0.770271	0.769629	0.768892	0.771097	0.763949	0.7641	0.766023	0.765504	0.760265	0.759904	0.770424	0.770116	0.771696	0.772429	0.773802	0.771093	0.769981	0.770575	0.771083
203	SWRI81*	0.714988	0.741238	0.740986	0.743206	0.741798	0.739601	0.737637	0.732579	0.732818	0.734316	0.734125	0.738808	0.742096	0.743024	0.736864	0.74409	0.742856	0.74149	0.741328	0.742049	0.760487	0.767667	0.767087	0.770881	0.771481	0.770724	0.772742	0.76918	0.769723	0.770076	0.769884	0.769446	0.770766	0.763931	0.764054	0.766126	0.765705	0.759636	0.759647	0.768822	0.770833	0.771074	0.771458	0.773022	0.769696	0.768924	0.770124	0.769914
204	OE 48.2*	0.717286	0.73911	0.739252	0.741587	0.740331	0.738956	0.736815	0.731961	0.731554	0.732908	0.732281	0.738879	0.739661	0.742118	0.736255	0.74225	0.741583	0.740873	0.739799	0.74421	0.759278	0.766093	0.765863	0.767679	0.767096	0.767209	0.769585	0.767167	0.766182	0.768741	0.765756	0.767163	0.767668	0.761595	0.761608	0.763001	0.762334	0.758433	0.757979	0.767154	0.768209	0.768211	0.768008	0.770826	0.770016	0.768075	0.769977	0.769949
205	ZA 5.3*	0.712904	0.736721	0.737302	0.739185	0.737107	0.736172	0.734062	0.728769	0.728697	0.729105	0.728586	0.734915	0.737463	0.739338	0.733393	0.73963	0.737837	0.73862	0.736589	0.741379	0.756336	0.764165	0.764859	0.765566	0.766309	0.765983	0.767647	0.766243	0.76484	0.766246	0.764872	0.765489	0.766647	0.760399	0.760452	0.760797	0.759893	0.756104	0.755217	0.764295	0.764985	0.766285	0.766415	0.769623	0.767267	0.766245	0.76716	0.768055
206	P. helmanticensis CECT 8548	0.71292	0.736879	0.738211	0.739331	0.737068	0.736429	0.733843	0.728527	0.729556	0.729653	0.729417	0.735829	0.736483	0.737887	0.732461	0.738579	0.736907	0.736944	0.736107	0.740341	0.757472	0.764681	0.765021	0.766784	0.766283	0.766409	0.76796	0.766353	0.765094	0.767032	0.765528	0.766526	0.767072	0.759568	0.759762	0.761376	0.760583	0.756631	0.756565	0.765107	0.765604	0.766871	0.766932	0.769939	0.768288	0.766809	0.768767	0.768917
207	P. crudilactis UCMA 17988	0.712233	0.73803	0.738361	0.740506	0.737847	0.736953	0.734011	0.729946	0.729215	0.731271	0.729525	0.735606	0.735906	0.738101	0.732651	0.740172	0.739022	0.738166	0.738177	0.740918	0.756755	0.764187	0.764553	0.766121	0.766523	0.766704	0.768101	0.764997	0.765239	0.765433	0.764904	0.765162	0.766231	0.759305	0.760508	0.761591	0.760224	0.7566	0.756808	0.765136	0.76503	0.765932	0.765041	0.7696	0.768202	0.76675	0.768083	0.767862
208	P. granadensis LMG 27940	0.713403	0.745195	0.745564	0.747148	0.745156	0.743394	0.741126	0.73642	0.735616	0.737998	0.736	0.742234	0.743691	0.745682	0.741117	0.746723	0.743741	0.745533	0.743416	0.745522	0.763458	0.769951	0.767912	0.770882	0.771655	0.771505	0.774102	0.770574	0.770416	0.771516	0.770405	0.77102	0.77151	0.766742	0.766382	0.768137	0.767998	0.762074	0.762117	0.772782	0.77356	0.774678	0.774829	0.775828	0.773691	0.771627	0.773922	0.774529
209	PGSB 8459*	0.714497	0.739605	0.739266	0.740765	0.740421	0.738034	0.735951	0.731073	0.731342	0.731775	0.731907	0.737612	0.738965	0.741849	0.735098	0.743182	0.741993	0.74116	0.739405	0.741722	0.760533	0.768659	0.768481	0.772837	0.77231	0.772997	0.772724	0.770142	0.769603	0.771571	0.77006	0.769714	0.771113	0.764545	0.76422	0.7664	0.765265	0.758603	0.758948	0.76993	0.77039	0.771008	0.77052	0.775529	0.771392	0.77013	0.771835	0.771971
210	P. koreensis LMG 21318	0.712767	0.743918	0.744423	0.745695	0.744562	0.742913	0.740166	0.734985	0.733695	0.737672	0.735406	0.741072	0.742407	0.746687	0.739573	0.746563	0.744445	0.744171	0.743266	0.746588	0.764216	0.772887	0.771983	0.774855	0.775856	0.775872	0.776281	0.773186	0.773571	0.774936	0.773549	0.77374	0.775779	0.7677	0.768188	0.769507	0.769495	0.764024	0.763738	0.774701	0.773615	0.775037	0.776184	0.778836	0.774567	0.772149	0.774254	0.77425
211	P. baetica CECT 7720	0.714946	0.742026	0.74321	0.745197	0.742913	0.743658	0.741133	0.735694	0.734314	0.735336	0.733943	0.741572	0.743216	0.745378	0.739357	0.745305	0.743087	0.742279	0.742004	0.744459	0.761267	0.766189	0.766357	0.768082	0.768091	0.768804	0.770445	0.768136	0.76757	0.768515	0.768292	0.768993	0.769065	0.763189	0.762851	0.765091	0.764889	0.760635	0.760381	0.76803	0.769096	0.77032	0.770713	0.772755	0.769012	0.768275	0.769287	0.77031
212	P. arsenicoxydans CECT 7543	0.712395	0.7398	0.739998	0.740693	0.740276	0.739093	0.736091	0.73184	0.730725	0.733189	0.732238	0.737793	0.739143	0.741441	0.736506	0.740038	0.738056	0.738959	0.738816	0.741513	0.757245	0.765391	0.764944	0.767472	0.768452	0.767623	0.768896	0.765512	0.765681	0.764965	0.766643	0.768658	0.769253	0.760704	0.760553	0.761853	0.761508	0.756542	0.756686	0.764193	0.764697	0.765153	0.765739	0.769299	0.76663	0.766071	0.767837	0.767029
213	P. frederiksbergensis DSM 13022	0.712972	0.74159	0.741833	0.743853	0.743703	0.740964	0.738761	0.735121	0.733036	0.738447	0.734913	0.741163	0.742772	0.744347	0.739788	0.744897	0.744636	0.743374	0.742518	0.743969	0.76012	0.766872	0.766498	0.76912	0.770425	0.769848	0.770426	0.76825	0.767901	0.76749	0.769567	0.76994	0.770129	0.763406	0.763316	0.76388	0.764097	0.760071	0.759729	0.76699	0.767175	0.768745	0.77002	0.772483	0.769307	0.766697	0.76982	0.76948
214	P. mandelii LMG 21607	0.712505	0.742259	0.741553	0.747238	0.742027	0.741776	0.739231	0.735952	0.733073	0.736327	0.733305	0.740171	0.740139	0.743372	0.737463	0.742957	0.73974	0.743137	0.746073	0.743627	0.758711	0.766341	0.764788	0.768017	0.769326	0.768132	0.76828	0.765965	0.76522	0.767078	0.766773	0.767327	0.768226	0.762509	0.76194	0.763648	0.762204	0.758582	0.758765	0.766258	0.765881	0.766548	0.766665	0.771727	0.768012	0.766876	0.768365	0.768853
215	P. lini CIP 107460	0.714359	0.742569	0.742565	0.744699	0.743247	0.741988	0.739744	0.734598	0.734013	0.737656	0.734984	0.741038	0.741015	0.743687	0.73879	0.744545	0.741794	0.741986	0.742275	0.744423	0.762817	0.765244	0.76525	0.766873	0.767922	0.76791	0.767728	0.767929	0.767675	0.767252	0.768024	0.769739	0.769674	0.764024	0.764087	0.764955	0.765661	0.761453	0.761835	0.767599	0.767785	0.768902	0.769196	0.771984	0.770429	0.7678	0.770164	0.769966
216	P. silesiensis A3	0.711872	0.745068	0.745876	0.745577	0.745329	0.743389	0.741341	0.7354	0.735096	0.738439	0.736815	0.742445	0.744935	0.747799	0.740863	0.748776	0.747313	0.746588	0.744909	0.746703	0.763055	0.77117	0.768784	0.771534	0.772988	0.772353	0.772452	0.770633	0.77037	0.77299	0.772013	0.772569	0.773345	0.766846	0.766131	0.767665	0.768105	0.764218	0.763975	0.769174	0.771314	0.77111	0.771915	0.775334	0.772707	0.77094	0.772465	0.772772
217	P. migulae CCUG 43165	0.712844	0.743474	0.743952	0.745655	0.745546	0.741901	0.740729	0.734452	0.732952	0.738465	0.736267	0.741479	0.741928	0.743884	0.740534	0.744236	0.7441	0.744105	0.74319	0.746405	0.762429	0.767009	0.766245	0.768762	0.770012	0.769808	0.769241	0.768621	0.768721	0.768314	0.768973	0.768611	0.769956	0.764901	0.764492	0.764847	0.764716	0.761488	0.761535	0.769086	0.767768	0.768729	0.769471	0.772286	0.768263	0.767793	0.769694	0.769824
218	P. prosekii LMG 26867	0.712908	0.740501	0.74107	0.743554	0.742632	0.741341	0.738597	0.733214	0.731476	0.735042	0.734466	0.739714	0.73984	0.742904	0.736912	0.743794	0.739895	0.7405	0.740069	0.744169	0.760198	0.768194	0.765439	0.76802	0.769616	0.769508	0.76993	0.767949	0.767933	0.767562	0.76656	0.76658	0.768031	0.762802	0.762832	0.763698	0.763454	0.758413	0.758694	0.767429	0.767982	0.769878	0.769635	0.77227	0.768604	0.767376	0.769625	0.770156
219	P. deceptionensis CECT 7677	0.716591	0.738332	0.737309	0.740127	0.737725	0.735673	0.735193	0.729807	0.728524	0.731856	0.729199	0.734172	0.735965	0.738158	0.734119	0.737842	0.738016	0.736591	0.737606	0.740815	0.755195	0.757346	0.75824	0.760478	0.76177	0.76184	0.760814	0.75912	0.758389	0.760972	0.759923	0.761475	0.763141	0.757217	0.756288	0.756492	0.756179	0.754375	0.754764	0.758619	0.758879	0.760059	0.760612	0.764798	0.76261	0.761653	0.763219	0.761331
220	P. psychrophila DSM 17535	0.716901	0.740877	0.743301	0.745118	0.74266	0.741823	0.739462	0.73522	0.734828	0.739821	0.735939	0.740353	0.739837	0.741732	0.73881	0.741469	0.741321	0.741213	0.743004	0.74385	0.75746	0.757871	0.755939	0.756658	0.759596	0.759565	0.757624	0.757397	0.757165	0.757638	0.758033	0.759747	0.760794	0.757392	0.756068	0.754815	0.756879	0.755911	0.756213	0.757777	0.757884	0.75888	0.759938	0.764764	0.762981	0.759632	0.763505	0.761166
221	P. versuta L10.10	0.714541	0.740625	0.743127	0.742237	0.741692	0.741032	0.739593	0.734255	0.731498	0.737199	0.733657	0.737375	0.738166	0.739664	0.736772	0.739799	0.738409	0.739363	0.740212	0.744517	0.757017	0.75689	0.755866	0.757845	0.760455	0.758884	0.758805	0.758788	0.758475	0.757958	0.759438	0.759591	0.761188	0.757577	0.756749	0.755072	0.75582	0.755352	0.75538	0.758117	0.758433	0.75869	0.760474	0.764133	0.762179	0.760207	0.762842	0.76118
222	P. fragi CECT 446	0.715957	0.745222	0.746002	0.746803	0.745759	0.74406	0.743898	0.737145	0.737892	0.740552	0.737361	0.74072	0.743404	0.745361	0.740824	0.747255	0.744638	0.744599	0.745609	0.747501	0.762189	0.765386	0.764811	0.766297	0.769174	0.768829	0.767681	0.76591	0.765285	0.766662	0.766921	0.768218	0.769592	0.764505	0.763361	0.762129	0.764457	0.76261	0.762281	0.765451	0.766085	0.767602	0.769114	0.772884	0.76876	0.767236	0.769843	0.767837
223	P. lundensis ATCC 49968	0.715629	0.734978	0.734827	0.735378	0.734793	0.734374	0.73258	0.726603	0.725009	0.728586	0.729496	0.731417	0.734837	0.735033	0.735314	0.735839	0.733576	0.73433	0.733059	0.740012	0.751357	0.754535	0.756348	0.758611	0.759465	0.759633	0.757724	0.756694	0.757292	0.757469	0.758657	0.758972	0.760761	0.753731	0.752657	0.754274	0.753897	0.751437	0.750883	0.754979	0.756112	0.757011	0.757698	0.761379	0.759422	0.759122	0.759676	0.75919
224	P. weihenstephanensis DSM 29166	0.715888	0.732714	0.732172	0.732868	0.732682	0.731264	0.730938	0.726425	0.725371	0.72822	0.724917	0.730801	0.731137	0.732844	0.729336	0.733081	0.731984	0.731114	0.732681	0.738606	0.74921	0.749832	0.752231	0.753559	0.754038	0.754202	0.753351	0.753198	0.753402	0.752477	0.754026	0.755545	0.755129	0.748759	0.74936	0.749153	0.748359	0.747303	0.747525	0.750074	0.750097	0.753051	0.752181	0.756582	0.756296	0.755027	0.756561	0.755694
225	P. taetrolens LMG 2336	0.715238	0.734925	0.734811	0.735734	0.734254	0.733835	0.732388	0.727898	0.727758	0.729495	0.726629	0.730096	0.732601	0.733578	0.73061	0.734936	0.734015	0.733889	0.734376	0.736968	0.751636	0.753471	0.754514	0.755631	0.75586	0.756515	0.755744	0.755304	0.755136	0.755753	0.755922	0.757808	0.758781	0.752852	0.751693	0.751943	0.751572	0.750507	0.750878	0.75357	0.753054	0.75501	0.755672	0.760416	0.757819	0.757373	0.75847	0.757813
226	P. endophytica BSTT44	0.717549	0.729965	0.7298	0.730382	0.728819	0.727639	0.726578	0.722748	0.720886	0.724493	0.720723	0.725522	0.726596	0.726251	0.724	0.726106	0.726047	0.725685	0.730383	0.734419	0.74228	0.741455	0.743992	0.743874	0.744741	0.744672	0.74481	0.743701	0.744181	0.742895	0.744839	0.74614	0.746244	0.741775	0.741185	0.740492	0.739253	0.742313	0.742665	0.741583	0.740956	0.742337	0.742537	0.747705	0.747079	0.746417	0.747165	0.746759
227	P. helleri DSM 29165	0.716048	0.735594	0.736764	0.736893	0.734346	0.734701	0.732074	0.728221	0.726247	0.729509	0.728448	0.731541	0.733818	0.7355	0.730295	0.734592	0.733671	0.733202	0.733084	0.740506	0.752743	0.755323	0.75668	0.759	0.759096	0.75976	0.760079	0.757581	0.758047	0.757968	0.758514	0.759903	0.760607	0.754269	0.754171	0.753316	0.753285	0.751233	0.752022	0.755397	0.756574	0.758085	0.757747	0.761168	0.760976	0.759267	0.760935	0.760015
228	SWRI52*	0.713972	0.740004	0.740683	0.74206	0.73942	0.738587	0.737203	0.73032	0.731469	0.7338	0.731041	0.735696	0.740387	0.743792	0.735009	0.744283	0.74244	0.741826	0.7397	0.74201	0.760307	0.767834	0.768721	0.772632	0.773421	0.773252	0.771932	0.771128	0.77019	0.772306	0.772716	0.771297	0.773732	0.766131	0.766178	0.766954	0.767259	0.760403	0.760248	0.768397	0.767974	0.769094	0.769882	0.775787	0.771496	0.769981	0.770993	0.770358
229	P. gessardii CIP 105469	0.714284	0.746377	0.74825	0.746622	0.745802	0.746197	0.74074	0.737749	0.735598	0.738435	0.736284	0.739871	0.745071	0.748662	0.740576	0.748189	0.744852	0.744657	0.746843	0.746424	0.763645	0.77024	0.769385	0.774123	0.77506	0.775467	0.773256	0.771929	0.771731	0.774756	0.774814	0.772124	0.777631	0.768596	0.768317	0.770426	0.769986	0.76356	0.763023	0.77417	0.77204	0.773623	0.774126	0.779476	0.774358	0.770936	0.77296	0.77311
230	SWRI104*	0.714433	0.742151	0.74136	0.743582	0.741813	0.739363	0.738166	0.733893	0.733216	0.734499	0.735058	0.73659	0.742869	0.744675	0.737882	0.745415	0.744233	0.741979	0.741614	0.744788	0.76081	0.76781	0.768352	0.771912	0.772561	0.772478	0.771179	0.770519	0.770661	0.773676	0.772649	0.771757	0.774015	0.765992	0.765665	0.768004	0.766649	0.762078	0.761305	0.769751	0.770719	0.77158	0.771872	0.774852	0.771601	0.769872	0.771539	0.771202
231	P. proteolytica CIP 108464	0.712269	0.74523	0.743476	0.745026	0.744341	0.742078	0.741025	0.736789	0.734439	0.737907	0.738521	0.740319	0.744529	0.746729	0.742011	0.747489	0.744542	0.744244	0.743278	0.745085	0.762318	0.768828	0.768701	0.771178	0.772782	0.772832	0.771559	0.771492	0.771432	0.772759	0.774073	0.772714	0.775515	0.766947	0.766848	0.767352	0.76734	0.763519	0.76286	0.770767	0.769109	0.772855	0.772682	0.778397	0.773233	0.769191	0.771651	0.772003
232	P. brennerii DSM 15294	0.711338	0.74287	0.744014	0.744917	0.744104	0.741688	0.740992	0.735275	0.735323	0.736362	0.736185	0.740469	0.743195	0.74778	0.741206	0.746908	0.744901	0.743913	0.743677	0.746238	0.760887	0.768183	0.767843	0.771722	0.773168	0.772383	0.771623	0.771123	0.770719	0.772145	0.772577	0.771634	0.772889	0.768841	0.768691	0.76663	0.767209	0.762982	0.763194	0.769505	0.770283	0.770649	0.771788	0.775809	0.771792	0.769457	0.771395	0.77029
233	P. yamanorum LMG 27247	0.713524	0.740934	0.741929	0.742568	0.741761	0.739664	0.739427	0.733686	0.732712	0.734893	0.733959	0.739297	0.742061	0.74537	0.73875	0.743799	0.743563	0.742315	0.743472	0.744268	0.760959	0.765739	0.767996	0.770608	0.772348	0.771206	0.77043	0.769272	0.770482	0.770695	0.771868	0.770352	0.77234	0.76579	0.766117	0.766805	0.766305	0.761042	0.761131	0.768598	0.768626	0.769367	0.770002	0.775148	0.771009	0.768709	0.770622	0.770231
234	P. mucidolens LMG 2223	0.712774	0.738573	0.739477	0.741424	0.740989	0.737791	0.736857	0.732484	0.732292	0.735332	0.731603	0.737975	0.738469	0.741309	0.735332	0.741687	0.740098	0.740115	0.740166	0.74314	0.759522	0.761716	0.761342	0.76369	0.764809	0.764147	0.76405	0.764826	0.763974	0.765585	0.766349	0.76585	0.765573	0.761305	0.761459	0.761492	0.761056	0.757986	0.757986	0.763403	0.762971	0.766077	0.766002	0.768905	0.765456	0.763764	0.765864	0.76583
235	SWRI18*	0.710993	0.741226	0.741645	0.742576	0.740392	0.740782	0.73595	0.731936	0.730739	0.733356	0.73047	0.734109	0.739486	0.742387	0.736553	0.743114	0.742461	0.739792	0.739947	0.742478	0.760778	0.768289	0.768948	0.772755	0.77323	0.773585	0.772093	0.771783	0.771586	0.773713	0.773631	0.773035	0.774316	0.766616	0.766242	0.767823	0.766687	0.759951	0.759727	0.769908	0.769887	0.771151	0.771853	0.776047	0.771031	0.769503	0.77107	0.77085
236	P. cedrina subsp. cedrina DSM 17516	0.712546	0.74289	0.744299	0.745243	0.744533	0.742551	0.73914	0.73321	0.734968	0.737336	0.732968	0.738785	0.743116	0.745813	0.738246	0.745604	0.746248	0.742902	0.743352	0.745096	0.763099	0.76937	0.769396	0.775026	0.774997	0.776701	0.773965	0.772619	0.772379	0.774689	0.77491	0.773485	0.776197	0.769306	0.7688	0.768719	0.769517	0.763319	0.76346	0.77298	0.773489	0.774051	0.774293	0.778624	0.772761	0.770964	0.773037	0.772333
237	SWRI103*	0.713803	0.742511	0.742495	0.743159	0.742111	0.741116	0.736556	0.731646	0.731594	0.733028	0.731501	0.734374	0.73992	0.743337	0.737873	0.744813	0.743565	0.741569	0.739626	0.742397	0.761234	0.768696	0.770243	0.775047	0.774763	0.775107	0.773318	0.772229	0.772836	0.773461	0.774164	0.773174	0.775401	0.76699	0.767064	0.767797	0.766536	0.759717	0.759827	0.771056	0.770866	0.772459	0.772603	0.775356	0.77144	0.77005	0.770949	0.771267
238	SWRI145*	0.7127	0.734056	0.734236	0.736001	0.734525	0.733709	0.732429	0.727721	0.726799	0.727363	0.726796	0.731699	0.734277	0.735528	0.730912	0.737667	0.735788	0.734005	0.732596	0.738702	0.751788	0.758606	0.759366	0.762297	0.76289	0.762553	0.761838	0.761318	0.760947	0.761891	0.763107	0.762379	0.763646	0.755308	0.755271	0.755826	0.756467	0.751799	0.751817	0.758947	0.759439	0.760024	0.761063	0.764293	0.761419	0.760329	0.76124	0.761022
239	SWRI144*	0.714554	0.734886	0.734673	0.736385	0.734451	0.734522	0.732593	0.728908	0.727764	0.728864	0.727832	0.731455	0.734585	0.735688	0.730504	0.736786	0.736595	0.735173	0.734468	0.739649	0.751953	0.758718	0.759679	0.763443	0.764117	0.763851	0.762904	0.761867	0.761395	0.761669	0.762948	0.763133	0.764774	0.75631	0.756005	0.755489	0.756594	0.752206	0.752211	0.759018	0.759313	0.760437	0.761619	0.765029	0.761943	0.76092	0.761315	0.760758
240	P. costantinii LMG 22119	0.711238	0.741445	0.743808	0.745248	0.743726	0.742988	0.739931	0.734636	0.733208	0.736117	0.735635	0.740675	0.741522	0.743927	0.739914	0.743558	0.74305	0.742093	0.741045	0.745978	0.760213	0.763187	0.763569	0.764883	0.767523	0.767806	0.765647	0.765117	0.766356	0.766086	0.767605	0.766071	0.767839	0.764366	0.76412	0.761177	0.761988	0.759505	0.759898	0.765871	0.765559	0.767228	0.767182	0.770731	0.767474	0.765329	0.767756	0.767357
241	P. kairouanesis KC12	0.713376	0.740894	0.74023	0.741871	0.739765	0.738716	0.734882	0.730134	0.729059	0.731582	0.731104	0.734484	0.738412	0.741734	0.73564	0.742462	0.742449	0.741048	0.739175	0.742464	0.758093	0.76548	0.769259	0.772297	0.771435	0.772383	0.771005	0.76967	0.769244	0.769935	0.772319	0.771585	0.772638	0.764153	0.764351	0.764575	0.763977	0.759091	0.7591	0.767553	0.767083	0.768403	0.768271	0.773233	0.770108	0.768496	0.769872	0.769905
242	P. nabeulensis E10B	0.714035	0.73762	0.739724	0.740621	0.738403	0.738454	0.7351	0.730505	0.728651	0.731715	0.729748	0.732806	0.739808	0.740811	0.735116	0.742137	0.740988	0.740614	0.738357	0.743401	0.758395	0.765024	0.767121	0.769388	0.769055	0.7703	0.76939	0.768836	0.767869	0.770978	0.770414	0.770778	0.772104	0.764532	0.763172	0.763652	0.763125	0.759086	0.759038	0.766927	0.766723	0.767503	0.766855	0.773454	0.769128	0.768307	0.769716	0.76857
243	P. marginalis ATCC 10844	0.712172	0.745481	0.747024	0.747918	0.746569	0.744051	0.742556	0.736337	0.73616	0.739241	0.735952	0.742357	0.745156	0.749332	0.741451	0.747599	0.74789	0.747338	0.745927	0.747492	0.764253	0.769796	0.769845	0.774089	0.774893	0.776077	0.772525	0.772892	0.773052	0.774832	0.774967	0.774201	0.775603	0.7688	0.769669	0.769466	0.770236	0.763961	0.765067	0.772867	0.772285	0.773901	0.773324	0.777438	0.77262	0.769923	0.772148	0.772439
244	P. grimontii ATCC BAA-140	0.711475	0.741966	0.742255	0.745974	0.743826	0.742398	0.738246	0.736527	0.734655	0.736995	0.733449	0.738833	0.741739	0.745637	0.736807	0.745383	0.743504	0.745405	0.742986	0.744956	0.76319	0.769078	0.769444	0.772353	0.773304	0.774276	0.772313	0.771818	0.77118	0.773132	0.772359	0.772228	0.774321	0.767644	0.767096	0.767005	0.766998	0.761278	0.761687	0.770169	0.770924	0.771584	0.771207	0.775387	0.769916	0.768917	0.770535	0.770858
245	P. panacis CIP 108524	0.712165	0.744504	0.744909	0.747647	0.744917	0.744417	0.741676	0.736436	0.736316	0.739321	0.737415	0.741849	0.745041	0.748388	0.740596	0.748008	0.747076	0.746783	0.744976	0.748876	0.763833	0.773307	0.771948	0.775844	0.776456	0.776691	0.775485	0.774705	0.772929	0.776337	0.773575	0.773999	0.777002	0.769614	0.769543	0.770677	0.771006	0.764259	0.764284	0.773831	0.773798	0.775007	0.775739	0.779247	0.774911	0.77306	0.775197	0.773899
246	P. veronii LMG 17761	0.712664	0.739098	0.739569	0.742454	0.739804	0.739455	0.735749	0.73172	0.730672	0.731965	0.730774	0.734849	0.740389	0.743445	0.735076	0.742716	0.742292	0.742162	0.740029	0.745	0.76213	0.771309	0.771254	0.776106	0.775369	0.775854	0.774852	0.772702	0.770944	0.77503	0.77152	0.772515	0.775435	0.767467	0.767005	0.768318	0.767531	0.76161	0.761936	0.771283	0.770631	0.77227	0.77224	0.77757	0.772124	0.770682	0.772409	0.77176
247	P. orientalis DSM 17489	0.712375	0.745599	0.745411	0.746715	0.746169	0.743587	0.743019	0.736286	0.737488	0.740278	0.736119	0.743301	0.745409	0.748727	0.741949	0.749287	0.747477	0.746705	0.746165	0.747344	0.76422	0.770994	0.770811	0.774486	0.775981	0.775878	0.775736	0.773186	0.773218	0.774714	0.775909	0.774836	0.776497	0.770843	0.770494	0.769477	0.769933	0.76405	0.764467	0.773644	0.77386	0.776013	0.775575	0.779151	0.773742	0.772247	0.774255	0.773328
248	P. extremaustralis DSM 17835	0.711707	0.743388	0.742287	0.744665	0.74158	0.741105	0.738933	0.734423	0.732823	0.736111	0.734175	0.738335	0.742926	0.742529	0.73694	0.746018	0.743341	0.742321	0.740869	0.743624	0.762174	0.769671	0.769722	0.774526	0.774519	0.775377	0.772652	0.772584	0.772268	0.772737	0.774342	0.773431	0.776201	0.766224	0.766603	0.768038	0.767185	0.76102	0.761294	0.770379	0.77099	0.771973	0.772138	0.775556	0.772244	0.770656	0.775316	0.773003
249	SWRI2*	0.712353	0.740361	0.740824	0.743302	0.742492	0.739307	0.738033	0.732538	0.733058	0.734907	0.732588	0.737866	0.739876	0.743561	0.738236	0.745078	0.744281	0.742289	0.741352	0.743885	0.761444	0.77018	0.770874	0.775339	0.775456	0.776331	0.77422	0.773543	0.772558	0.774685	0.774255	0.772031	0.775519	0.767458	0.76741	0.768257	0.768135	0.762066	0.762084	0.770325	0.771543	0.772559	0.77178	0.776791	0.772368	0.769632	0.771983	0.771702
250	P. poae DSM 14936	0.712768	0.744507	0.744064	0.746438	0.743737	0.74318	0.74081	0.73657	0.734265	0.737023	0.735705	0.741657	0.743055	0.746178	0.739302	0.748324	0.746015	0.745346	0.744441	0.746164	0.764371	0.770975	0.770865	0.774808	0.77541	0.775534	0.774169	0.773091	0.77301	0.774469	0.774859	0.77271	0.775868	0.76955	0.769149	0.769612	0.769492	0.763735	0.762525	0.772729	0.773008	0.774043	0.773002	0.778649	0.773544	0.771085	0.773247	0.77356
251	P. trivialis LMG 21464	0.712776	0.741899	0.740507	0.742739	0.740296	0.738846	0.737755	0.732349	0.731882	0.733525	0.73319	0.736017	0.740788	0.743633	0.738154	0.746326	0.744014	0.743887	0.74156	0.743486	0.762002	0.769758	0.771083	0.775451	0.775486	0.776905	0.774777	0.772469	0.772333	0.77472	0.7746	0.773114	0.776649	0.767738	0.767658	0.769028	0.769948	0.761786	0.761825	0.771954	0.771774	0.772853	0.772676	0.77797	0.772304	0.770778	0.77204	0.772403
252	SWRI70*	0.71349	0.740262	0.740048	0.741574	0.740389	0.738954	0.736492	0.731659	0.73293	0.734417	0.731987	0.736426	0.740505	0.743401	0.737636	0.743454	0.742951	0.741289	0.740599	0.743351	0.758906	0.763699	0.76654	0.768586	0.770144	0.769558	0.769365	0.768094	0.767953	0.76948	0.769756	0.768349	0.770386	0.763107	0.763018	0.763875	0.763605	0.75928	0.75884	0.767182	0.767202	0.767246	0.767548	0.771374	0.769069	0.767552	0.769068	0.768149
253	P. paralactis DSM 29164	0.713212	0.739507	0.739351	0.7401	0.739706	0.736931	0.735932	0.730271	0.731316	0.73228	0.730111	0.734016	0.738483	0.740175	0.735201	0.740136	0.739833	0.740016	0.738834	0.741452	0.757851	0.763066	0.766458	0.769156	0.770014	0.769921	0.768586	0.767813	0.76755	0.769082	0.769589	0.768736	0.770275	0.761889	0.762583	0.763923	0.762887	0.758284	0.757491	0.765678	0.765228	0.767145	0.767362	0.77166	0.768621	0.768057	0.76873	0.769178
254	SWRI126*	0.713799	0.739884	0.739798	0.741924	0.739496	0.738046	0.737202	0.732109	0.732552	0.732045	0.72949	0.735914	0.739711	0.743032	0.734665	0.743847	0.743472	0.740929	0.740345	0.742928	0.759758	0.766229	0.768851	0.772211	0.772465	0.773158	0.771858	0.769986	0.769809	0.771837	0.771982	0.771099	0.772905	0.76506	0.765073	0.765049	0.765717	0.760673	0.760094	0.769556	0.768906	0.770138	0.769298	0.774158	0.770255	0.769378	0.770144	0.769537
255	P. lactis DSM 29167	0.712467	0.738296	0.738274	0.739324	0.738676	0.735549	0.734292	0.731838	0.730042	0.731106	0.734923	0.734092	0.737864	0.740218	0.737121	0.747471	0.740246	0.738833	0.739149	0.742092	0.759131	0.765252	0.767488	0.769909	0.770612	0.771296	0.769593	0.768371	0.770638	0.770408	0.770168	0.769527	0.77229	0.764397	0.763674	0.764164	0.764193	0.760027	0.759204	0.766626	0.767031	0.767887	0.767892	0.772915	0.769853	0.768329	0.769713	0.768137
256	SWRI22*	0.713789	0.741506	0.741163	0.742367	0.741488	0.740154	0.737115	0.732713	0.73162	0.734465	0.731622	0.735761	0.740729	0.743696	0.736438	0.742801	0.742785	0.741626	0.740457	0.743135	0.759348	0.765423	0.767435	0.770996	0.771121	0.772115	0.770912	0.768629	0.768611	0.769814	0.771204	0.769992	0.773258	0.765029	0.765124	0.765777	0.765012	0.759494	0.759429	0.767487	0.768732	0.770555	0.769187	0.773689	0.770087	0.768646	0.769824	0.769133
257	P. libanensis CIP 105460	0.712947	0.746348	0.745192	0.74711	0.745459	0.743637	0.742769	0.736548	0.736369	0.738549	0.736746	0.742415	0.745283	0.74744	0.741498	0.747559	0.747677	0.744884	0.743678	0.745606	0.761993	0.767613	0.767495	0.7707	0.773011	0.772838	0.771231	0.769945	0.76988	0.771667	0.772322	0.770715	0.773403	0.767815	0.767348	0.767197	0.766609	0.761835	0.761812	0.770853	0.770235	0.77093	0.772183	0.774522	0.768957	0.768211	0.769591	0.770064
258	P. synxantha ATCC 9890	0.710814	0.742567	0.744048	0.745047	0.742656	0.741516	0.739137	0.734289	0.734319	0.738213	0.73433	0.739717	0.743063	0.747062	0.739525	0.747093	0.74453	0.745207	0.743968	0.744677	0.762091	0.767047	0.767277	0.770003	0.772706	0.772058	0.770166	0.769026	0.76951	0.770859	0.771667	0.770211	0.771991	0.766716	0.766693	0.766147	0.766167	0.760754	0.761609	0.769295	0.768173	0.770357	0.770696	0.77411	0.770632	0.767776	0.769621	0.7705
259	P. haemolytica DSM 108988	0.712031	0.738566	0.738416	0.739239	0.737089	0.736387	0.735445	0.729951	0.730009	0.731747	0.729947	0.734445	0.737993	0.740646	0.733614	0.741852	0.740076	0.739463	0.736798	0.740994	0.757767	0.764092	0.766115	0.769118	0.769198	0.769927	0.769659	0.766659	0.767377	0.768959	0.769442	0.769002	0.771386	0.762211	0.762668	0.76388	0.762985	0.756366	0.756882	0.765482	0.766071	0.767112	0.768045	0.774097	0.769084	0.766874	0.767842	0.767573
260	P. antarctica LMG 22709	0.7127	0.739427	0.740583	0.741646	0.741009	0.73901	0.737252	0.733285	0.731521	0.733677	0.73241	0.736703	0.73964	0.743038	0.737729	0.742563	0.742382	0.742343	0.740489	0.743259	0.75789	0.764022	0.764689	0.767529	0.769078	0.769107	0.767193	0.766351	0.767477	0.766836	0.766836	0.766565	0.768335	0.76274	0.763085	0.761865	0.760482	0.757708	0.75775	0.765233	0.764553	0.766854	0.76615	0.770675	0.76784	0.76535	0.768365	0.767856
261	P. fluorescens ATCC 13525	0.712476	0.737941	0.738025	0.739958	0.739363	0.738103	0.735289	0.730867	0.731006	0.731699	0.730805	0.734893	0.738322	0.740721	0.735412	0.741301	0.740023	0.738716	0.738002	0.742816	0.758096	0.762644	0.765217	0.767864	0.768992	0.768788	0.767471	0.76639	0.766148	0.767123	0.767886	0.767944	0.767762	0.763137	0.763495	0.762905	0.7633	0.756996	0.757027	0.765369	0.765958	0.768248	0.767534	0.770502	0.767795	0.766234	0.767643	0.767406
262	P. rhodesiae LMG 17764	0.712839	0.743064	0.741861	0.746412	0.74022	0.740457	0.738939	0.734253	0.730702	0.73408	0.738811	0.737429	0.741894	0.742692	0.736684	0.750846	0.742264	0.741271	0.741839	0.744374	0.759206	0.765856	0.765991	0.769758	0.771021	0.771211	0.769188	0.768789	0.769972	0.770308	0.770778	0.769164	0.773699	0.764341	0.76399	0.764739	0.764792	0.760538	0.760058	0.766538	0.766746	0.768821	0.768224	0.778319	0.76992	0.767103	0.768449	0.768997
263	P. palleroniana LMG 23076	0.712081	0.743699	0.743701	0.744926	0.743623	0.742397	0.739292	0.734985	0.734441	0.735056	0.736248	0.740614	0.742545	0.745627	0.741081	0.745779	0.74503	0.743865	0.742675	0.744962	0.761847	0.766665	0.767364	0.769361	0.7714	0.771747	0.770383	0.76992	0.769895	0.771073	0.771453	0.769971	0.772119	0.764897	0.765433	0.765916	0.765255	0.761182	0.761418	0.768202	0.767572	0.769877	0.769659	0.773797	0.769945	0.766892	0.770245	0.7703
264	P. tolaasii NCPPB 2192	0.712784	0.74277	0.743439	0.744881	0.743393	0.74095	0.739179	0.734059	0.733885	0.734632	0.733662	0.739101	0.741724	0.744681	0.738391	0.744116	0.742382	0.741185	0.741723	0.747373	0.761102	0.765468	0.768128	0.770213	0.771357	0.772018	0.771261	0.769854	0.76976	0.771739	0.770861	0.769852	0.772423	0.766432	0.766031	0.764456	0.765715	0.761862	0.761515	0.769732	0.770332	0.770171	0.770696	0.774775	0.7716	0.769422	0.77084	0.772105
265	OE 28.3*	0.714152	0.738626	0.738593	0.739887	0.739311	0.737993	0.736404	0.73118	0.729156	0.73081	0.73013	0.734745	0.737862	0.738665	0.733933	0.74095	0.739966	0.737582	0.738566	0.742158	0.758607	0.764168	0.766473	0.770533	0.770664	0.770822	0.770122	0.768422	0.768531	0.769796	0.769341	0.768348	0.769959	0.762179	0.762651	0.763227	0.763711	0.757202	0.757314	0.765936	0.76592	0.766613	0.767466	0.772708	0.769363	0.767749	0.769116	0.768633
266	P. salomonii LMG 22120	0.714227	0.747072	0.74654	0.747316	0.746878	0.74523	0.743487	0.737486	0.738763	0.739211	0.737509	0.743544	0.744355	0.747383	0.741914	0.746716	0.746006	0.745228	0.743355	0.749483	0.763809	0.768374	0.767053	0.771199	0.772873	0.77349	0.771645	0.77047	0.770386	0.772706	0.771525	0.770711	0.772535	0.767909	0.767802	0.766797	0.767717	0.763879	0.764118	0.77239	0.771233	0.772383	0.772929	0.776724	0.771065	0.7689	0.772171	0.771177
267	P. azotoformans LMG 21611	0.712194	0.744206	0.743695	0.744849	0.74416	0.743021	0.739499	0.734612	0.732512	0.735995	0.733336	0.738977	0.742142	0.745432	0.738644	0.746536	0.743945	0.74371	0.742814	0.744501	0.76239	0.769033	0.770718	0.773879	0.775316	0.775162	0.773297	0.773463	0.774096	0.773317	0.77441	0.773194	0.774891	0.769316	0.769056	0.766991	0.767633	0.763171	0.763178	0.771466	0.772124	0.773591	0.773636	0.77687	0.772648	0.770569	0.772694	0.772529
268	P. extremorientalis LMG 19695	0.712071	0.741769	0.742133	0.742832	0.743374	0.741367	0.737649	0.733016	0.732487	0.732869	0.732429	0.73814	0.740667	0.743819	0.736589	0.74489	0.743331	0.742389	0.741282	0.742628	0.759372	0.768259	0.76964	0.774267	0.774195	0.774581	0.772351	0.771754	0.771416	0.773147	0.773739	0.77184	0.773841	0.767694	0.767072	0.768737	0.768078	0.760473	0.760197	0.770656	0.770409	0.771927	0.772178	0.775119	0.770355	0.769271	0.769972	0.769909
269	P. aylmerense S1E40	0.711992	0.743252	0.742872	0.743675	0.741326	0.741864	0.739107	0.733499	0.733444	0.735694	0.733419	0.738169	0.742479	0.745105	0.737963	0.746278	0.74421	0.742481	0.742319	0.745492	0.761998	0.770023	0.770329	0.774161	0.774836	0.774408	0.773369	0.772831	0.772498	0.774303	0.773238	0.772088	0.774343	0.76734	0.76756	0.768273	0.767918	0.761827	0.761684	0.77121	0.772171	0.772981	0.774409	0.776996	0.772861	0.770633	0.772707	0.772827
270	PGSB 8273*	0.713655	0.739207	0.738688	0.739826	0.739179	0.738283	0.73434	0.728583	0.730097	0.729684	0.729702	0.73433	0.740053	0.741095	0.735753	0.741305	0.740523	0.739708	0.737838	0.741682	0.758068	0.767001	0.767931	0.771624	0.77174	0.771903	0.770267	0.769167	0.768672	0.771593	0.770666	0.770204	0.772383	0.764389	0.764136	0.764319	0.764233	0.760142	0.760288	0.768352	0.768147	0.769856	0.769725	0.773002	0.76997	0.768323	0.770057	0.769313
271	P. lurida DSM 15835	0.712155	0.742898	0.743373	0.745348	0.742392	0.741446	0.739239	0.731064	0.732459	0.735319	0.734525	0.738259	0.741226	0.744317	0.738754	0.744042	0.74366	0.743948	0.742947	0.744095	0.760613	0.76632	0.766808	0.770234	0.771875	0.771855	0.770003	0.76986	0.76932	0.772085	0.771369	0.770641	0.77244	0.766867	0.766843	0.766293	0.766376	0.761871	0.761869	0.769547	0.768813	0.771408	0.770936	0.774796	0.769784	0.768047	0.770712	0.770192
272	PGSB 3962*	0.712418	0.740225	0.739509	0.740902	0.739069	0.737285	0.735842	0.730695	0.731527	0.73165	0.729947	0.736212	0.739067	0.74194	0.735407	0.742523	0.739896	0.740588	0.738963	0.742975	0.758488	0.766021	0.767027	0.771214	0.771471	0.771518	0.769905	0.768738	0.76885	0.770736	0.771083	0.770324	0.772338	0.764166	0.764061	0.764743	0.763539	0.757739	0.758157	0.766866	0.768903	0.769842	0.7701	0.772689	0.768286	0.767078	0.768142	0.768492
273	PGSB 7828*	0.712455	0.740881	0.740602	0.742629	0.739931	0.740269	0.736563	0.732021	0.731009	0.732928	0.731685	0.736235	0.739409	0.741262	0.735962	0.742853	0.741881	0.740127	0.740106	0.742214	0.758758	0.76599	0.7676	0.771436	0.771582	0.771917	0.770375	0.769634	0.769194	0.771762	0.771607	0.770195	0.772309	0.765132	0.76517	0.765954	0.764668	0.758206	0.75845	0.767897	0.768144	0.771093	0.770433	0.772928	0.768942	0.767756	0.768626	0.769133
274	P. canadensis 2-92	0.71468	0.743835	0.743675	0.745514	0.744912	0.744565	0.741211	0.735968	0.734295	0.738283	0.737895	0.741316	0.743534	0.746346	0.740784	0.746575	0.744891	0.745528	0.744538	0.747536	0.761591	0.766351	0.767742	0.770871	0.772312	0.772766	0.770949	0.76953	0.769573	0.771078	0.772385	0.771052	0.772766	0.767556	0.76749	0.765704	0.766726	0.761717	0.761663	0.769625	0.769469	0.771274	0.771782	0.773989	0.770956	0.768633	0.770731	0.771542
275	P. simiae Oli	0.712658	0.743881	0.74324	0.745505	0.744074	0.742457	0.741049	0.735282	0.734712	0.736773	0.736895	0.740091	0.742308	0.74583	0.741121	0.746109	0.744386	0.743884	0.742438	0.746369	0.761382	0.765655	0.767458	0.770279	0.772319	0.771671	0.769948	0.768803	0.769618	0.770606	0.771422	0.770599	0.771144	0.767467	0.767378	0.766605	0.767182	0.76117	0.760754	0.770571	0.770209	0.771524	0.772542	0.774168	0.769771	0.767569	0.770548	0.769821
[truncated: 227 more columns]

## Sheet: TableS5_MLSA
		1	2	3	4	5	6	7	8	9	10	11	12	13	14	15	16	17	18	19	20	21	22	23	24	25	26	27	28	29
1	P. chengduensis DSM 26382		97.74	95.04	95.02	94.94	84.74	84.29	84.55	84.41	84.71	84.71	85.31	85.24	86.05	85.64	85.03	85.13	85.09	84.95	84.45	84.7	94.03	95.35	84.78	84.9	84.93	85.07	84.97	85.21
2	P. toyotomiensis JCM 15604	97.74		95.01	94.88	94.75	84.58	84.07	84.33	84.33	84.41	84.33	85.58	85.54	86.43	86.02	84.46	84.73	84.68	84.87	84.67	84.83	94.27	95.7	84.67	84.68	84.93	84.94	84.75	84.97
3	P. indoloxydans JCM 14246	95.04	95.01		97.51	97.48	83.95	83.45	83.57	83.7	83.95	83.92	85.07	84.73	85.73	85.32	84.49	84.51	84.51	84.62	84.07	84.48	93.22	95.17	84.04	84.3	84.63	84.72	84.37	84.5
4	P. oleovorans subsp. oleovorans ATCC 8062	95.02	94.88	97.51		99.48	84.18	83.67	83.74	83.96	84.04	84.04	85.05	84.64	85.88	85.27	84.61	84.63	84.66	84.68	84.22	84.58	93.18	94.11	84.29	84.44	84.67	84.71	84.48	84.62
5	P. pseudoalcaligenes subsp. pseudoalcaligenes LMG 1225	94.94	94.75	97.48	99.48		83.98	83.53	83.55	83.82	83.9	83.87	85.06	84.64	85.56	85.17	84.52	84.54	84.57	84.59	84.13	84.49	93.05	93.92	84.21	84.38	84.53	84.62	84.34	84.48
6	P. tremae LMG 22121	84.74	84.58	83.95	84.18	83.98		93.86	99.2	97.72	98.4	97.58	82.58	82.65	82.37	82.2	89.53	89.39	89.37	89.75	89.26	89.5	83.6	84.36	89.06	89.2	89.3	89.55	89.55	89.98
7	P. coronafaciens LMG 5060	84.29	84.07	83.45	83.67	83.53	93.86		94.44	94.22	93.75	93.83	81.7	81.86	81.77	81.55	88.77	88.79	88.85	88.74	88.57	88.79	83.26	84.05	88.27	88.33	88.59	88.68	88.73	89.27
8	P. amygdali LMG 13184	84.55	84.33	83.57	83.74	83.55	99.2	94.44		97.41	97.99	97.22	82.44	82.51	82.18	81.98	89.4	89.17	89.18	89.51	89.26	89.48	83.38	84.11	88.85	88.96	89.19	89.44	89.47	89.96
9	P. ficuserectae CCUG 32779	84.41	84.33	83.7	83.96	83.82	97.72	94.22	97.41		97.88	98.16	82.55	82.57	82.1	81.96	89.42	89.39	89.15	89.53	89.2	89.34	83.52	83.92	89.12	88.99	89	89.36	89.6	90.12
10	P. meliae ICMP 6289	84.71	84.41	83.95	84.04	83.9	98.4	93.75	97.99	97.88		98.57	82.49	82.57	82.07	82.06	89.51	89.31	89.21	89.56	89.2	89.28	83.68	84.19	89.01	89.18	88.97	89.36	89.33	89.93
11	P. savastanoi LMG 2209	84.71	84.33	83.92	84.04	83.87	97.58	93.83	97.22	98.16	98.57		82.44	82.54	82.21	82.14	89.89	89.72	89.51	89.83	89.5	89.56	83.6	84.17	89.15	89.26	89.13	89.58	89.8	90.37
12	P. chloritidismutans AW-1	85.31	85.58	85.07	85.05	85.06	82.58	81.7	82.44	82.55	82.49	82.44		98.24	84.21	84.15	81.93	81.92	81.88	81.98	81.54	81.79	85.12	85.55	81.68	81.68	82	81.73	81.96	82.18
13	P. kunmingensis DSM 25974	85.24	85.54	84.73	84.64	84.64	82.65	81.86	82.51	82.57	82.57	82.54	98.24		84.23	84.31	82	82.02	82	82.21	81.86	82	85	85.22	81.98	81.95	82.1	81.86	82.08	82.37
14	P. oryzihabitans ATCC 43272	86.05	86.43	85.73	85.88	85.56	82.37	81.77	82.18	82.1	82.07	82.21	84.21	84.23		98.6	82.49	82.7	82.79	82.94	82.75	82.91	86.59	86.4	83.09	82.84	82.75	82.96	82.58	82.89
15	P. psychrotolerans LMG 21977	85.64	86.02	85.32	85.27	85.17	82.2	81.55	81.98	81.96	82.06	82.14	84.15	84.31	98.6		82.17	82.38	82.41	82.59	82.59	82.7	86.23	85.96	82.85	82.54	82.54	82.66	82.31	82.72
16	P. grimontii ATCC BAA-140	85.03	84.46	84.49	84.61	84.52	89.53	88.77	89.4	89.42	89.51	89.89	81.93	82	82.49	82.17		98.41	97.78	96.07	94.58	95.11	84.52	85.03	93.55	94.17	94.4	95.27	94.56	95.75
17	P. marginalis ATCC 10844	85.13	84.73	84.51	84.63	84.54	89.39	88.79	89.17	89.39	89.31	89.72	81.92	82.02	82.7	82.38	98.41		98.57	95.9	94.49	94.96	84.57	84.97	93.48	94.08	94.42	95.21	94.31	95.55
18	P. panacis CIP 108524	85.09	84.68	84.51	84.66	84.57	89.37	88.85	89.18	89.15	89.21	89.51	81.88	82	82.79	82.41	97.78	98.57		95.96	94.34	95.05	84.47	85.14	93.77	94.56	94.37	95.32	94.43	95.47
19	P. veronii LMG 17761	84.95	84.87	84.62	84.68	84.59	89.75	88.74	89.51	89.53	89.56	89.83	81.98	82.21	82.94	82.59	96.07	95.9	95.96		94.44	94.83	84.09	84.63	94.06	94.52	94.53	95.21	94.37	95.44
20	P. libanensis CIP 105460	84.45	84.67	84.07	84.22	84.13	89.26	88.57	89.26	89.2	89.2	89.5	81.54	81.86	82.75	82.59	94.58	94.49	94.34	94.44		98.49	84.35	84.62	93.6	94.55	94.44	95.65	93.52	94.89
21	P. synxantha ATCC 9890	84.7	84.83	84.48	84.58	84.49	89.5	88.79	89.48	89.34	89.28	89.56	81.79	82	82.91	82.7	95.11	94.96	95.05	94.83	98.49		84.59	85	93.92	94.72	94.83	95.95	94.04	95.19
22	P. guguanensis JCM 18416	94.03	94.27	93.22	93.18	93.05	83.6	83.26	83.38	83.52	83.68	83.6	85.12	85	86.59	86.23	84.52	84.57	84.47	84.09	84.35	84.59		94.99	84.11	84.09	84.72	84.75	84.05	84.59
23	P. mendocina NCTC 10897	95.35	95.7	95.17	94.11	93.92	84.36	84.05	84.11	83.92	84.19	84.17	85.55	85.22	86.4	85.96	85.03	84.97	85.14	84.63	84.62	85	94.99		84.73	84.68	85.18	85.29	84.86	85.02
24	SWRI103	84.78	84.67	84.04	84.29	84.21	89.06	88.27	88.85	89.12	89.01	89.15	81.68	81.98	83.09	82.85	93.55	93.48	93.77	94.06	93.6	93.92	84.11	84.73		97.64	94.59	94	95.14	94.57
25	P. cedrina subsp. cedrina DSM 17516	84.9	84.68	84.3	84.44	84.38	89.2	88.33	88.96	88.99	89.18	89.26	81.68	81.95	82.84	82.54	94.17	94.08	94.56	94.52	94.55	94.72	84.09	84.68	97.64		93.68	94.77	94.12	94.97
26	SWRI126	84.93	84.93	84.63	84.67	84.53	89.3	88.59	89.19	89	88.97	89.13	82	82.1	82.75	82.54	94.4	94.42	94.37	94.53	94.44	94.83	84.72	85.18	94.59	93.68		97.89	95.66	95.09
27	P. lactis DSM 29167	85.07	84.94	84.72	84.71	84.62	89.55	88.68	89.44	89.36	89.36	89.58	81.73	81.86	82.96	82.66	95.27	95.21	95.32	95.21	95.65	95.95	84.75	85.29	94	94.77	97.89		94.8	95.68
28	OE 28.3	84.97	84.75	84.37	84.48	84.34	89.55	88.73	89.47	89.6	89.33	89.8	81.96	82.08	82.58	82.31	94.56	94.31	94.43	94.37	93.52	94.04	84.05	84.86	95.14	94.12	95.66	94.8		97.53
29	P. salomonii LMG 22120	85.21	84.97	84.5	84.62	84.48	89.98	89.27	89.96	90.12	89.93	90.37	82.18	82.37	82.89	82.72	95.75	95.55	95.47	95.44	94.89	95.19	84.59	85.02	94.57	94.97	95.09	95.68	97.53
